# Supplementary material for: Characterization of Sigma Factor Genes in Streptomyces lividans TK24 Using a Genomic Library-Based Approach for Multiple Gene Deletions
Source: Front Microbiol. 2018 Dec 10;9:3033. doi: 10.3389/fmicb.2018.03033 (PMC6295645; doi:10.3389/fmicb.2018.03033)
Supplement: Supplementary file 2 [file Data_Sheet_2.xlsx]

## Sheet: Tray 100
Clone name	SR4F_eq	SL1R_seq		Insert - bp	Location in tray 100
101	2209961	2232581	-22620	22620	A1			Tray 100
102	2439597	2424353	15244	15244	B1
103	4045805	4014360	31445	31445	C1				1	2	3	4	5	6	7	8	9	10	11	12
104	5641122	5668109	-26987	26987	D1			A	101	109	117	125	133	141	149	157	165	173	181	189
105	1183448	1204186	-20738	20738	E1			B	102	110	118	126	134	142	150	158	166	174	182	190
106	2701982	2735170	-33188	33188	F1			C	103	111	119	127	135	143	151	159	167	175	183	191
107	8291561	8269293	22268	22268	G1			D	104	112	120	128	136	144	152	160	168	176	184	192
108	583909	559776	24133	24133	H1			E	105	113	121	129	137	145	153	161	169	177	185	193
109	6318795	6299446	19349	19349	A2			F	106	114	122	130	138	146	154	162	170	178	186	194
110	7903109	7933664	-30555	30555	B2			G	107	115	123	131	139	147	155	163	171	179	187	195
111	5649485	5665641	-16156	16156	C2			H	108	116	124	132	140	148	156	164	172	180	188	196
112	6368762	6343869	24893	24893	D2
113	463601	488089	-24488	24488	E2
114	4057376	4087647	-30271	30271	F2
115	7302579	7318334	-15755	15755	G2
116	4945211	4922502	22709	22709	H2
117	3533264	3548341	-15077	15077	A3
118	3345192	3324923	20269	20269	B3
119	4251450	4266673	-15223	15223	C3
120	4865909	4886055	-20146	20146	D3
121	2577174	2560508	16666	16666	E3
122	2861745	2877020	-15275	15275	F3
123	2725790	2753174	-27384	27384	G3
124	5434115	5407119	26996	26996	H3
125	3572308	3588317	-16009	16009	A4
126	533649	504909	28740	28740	B4
127	6783654	6798983	-15329	15329	C4
128	2927268	2909656	17612	17612	D4
129	4516731	4544409	-27678	27678	E4
130	6959633	6922737	36896	36896	F4
131	2348558	2312094	36464	36464	G4
132	7583346	7566951	16395	16395	H4
133	3915410	3933914	-18504	18504	A5
134	3116201	3094402	21799	21799	B5
135	3636744	3609452	27292	27292	C5
136	1730760	1752723	-21963	21963	D5
137	6555513	6538356	17157	17157	E5
138	6187933	6172874	15059	15059	F5
139	1840963	1821251	19712	19712	G5
140	3386046	3404639	-18593	18593	H5
141	3116200	3094406	21794	21794	A6
142	5204505	5182609	21896	21896	B6
143	8135730	8117057	18673	18673	C6
144	4949968	4967775	-17807	17807	D6
145	1498758	1517432	-18674	18674	E6
146	2832079	2849341	-17262	17262	F6
147	2983547	2962469	21078	21078	G6
148	3900052	3915878	-15826	15826	H6
149	6196443	6220282	-23839	23839	A7
150	2927265	2909658	17607	17607	B7
151	1777155	1798044	-20889	20889	C7
152	7030495	7053199	-22704	22704	D7
153	1545635	1562901	-17266	17266	E7
154	4073130	4088527	-15397	15397	F7
155	7507921	7479831	28090	28090	G7
156	2669739	2713852	-44113	44113	H7
157	2829447	2795185	34262	34262	A8
158	2755066	2780096	-25030	25030	B8
159	4670216	4632622	37594	37594	C8
160	2583512	2564112	19400	19400	D8
161	4238950	4179438	59512	59512	E8
162	7623085	7654898	-31813	31813	F8
163	3278893	3302378	-23485	23485	G8
164	5235522	5213316	22206	22206	H8
165	1208214	1177727	30487	30487	A9
166	3975511	4034373	-58862	58862	B9
167	5442735	5413116	29619	29619	C9
168	3999975	3958061	41914	41914	D9
169	4967708	5004610	-36902	36902	E9
170	2988676	3005432	-16756	16756	F9
171	3873626	3830550	43076	43076	G9
172	7285168	7225107	60061	60061	H9
173	4496151	4474453	21698	21698	A10
174	4338573	4373430	-34857	34857	B10			68376
175	4349901	4309285	40616	40616	C10
176	4369876	4413705	-43829	43829	D10
177	4500908	4539507	-38599	38599	E10
178	2057201	2094081	-36880	36880	F10
179	4424052	4384218	39834	39834	G10
180	3874739	3895559	-20820	20820	H10
181	5756804	5783637	-26833	26833	A11
182	5698230	5717359	-19129	19129	B11
183	2271922	2237932	33990	33990	C11
184	7249857	7279347	-29490	29490	D11
185	7691030	7723421	-32391	32391	E11
186	3197972	3227048	-29076	29076	F11
187	3949552	3933145	16407	16407	G11
188	4348678	4368756	-20078	20078	H11
189	1663311	1702173	-38862	38862	A12
190	5028438	5063086	-34648	34648	B12
191	5342176	5311062	31114	31114	C12
192	4128490	4094453	34037	34037	D12
193	4073584	4035153	38431	38431	E12
194	2111069	2079944	31125	31125	F12
195	3740958	3704385	36573	36573	G12
196	6554111	6526149	27962	27962	H12
				2564210
				26710.5

## Sheet: Tray 200
Clone name	SR4F_eq	SL1R_seq		Insert - bp	Location in tray 200
201	4277383	4312071	-34688	34688	A1
202	4163630	4182610	-18980	18980	B1					1	2	3	4	5	6	7	8	9	10	11	12
203	2031985	2088820	-56835	56835	C1				A	201	209	217	225	233	241	249	257	265	273	281	289
204	2859660	2907133	-47473	47473	D1				B	202	210	218	226	234	242	250	258	266	274	282	290
205	6773320	6810273	-36953	36953	E1				C	203	211	219	227	235	243	251	259	267	275	283	291
206	3152798	3178167	-25369	25369	F1				D	204	212	220	228	236	244	252	260	268	276	284	292
207	7709542	7680125	29417	29417	G1				E	205	213	221	229	237	245	253	261	269	277	285	293
208	8029566	7982955	46611	46611	H1				F	206	214	222	230	238	246	254	262	270	278	286	294
209	4743103	4768538	-25435	25435	A2				G	207	215	223	231	239	247	255	263	271	279	287	295
210	4852903	4880054	-27151	27151	B2				H	208	216	224	232	240	248	256	264	272	280	288	296
211	4853165	4891500	-38335	38335	C2
212	2235354	2217130	18224	18224	D2
213	3454107	3475135	-21028	21028	E2
214	2746615	2785766	-39151	39151	F2
215	2991175	2970442	20733	20733	G2
216	7756955	7706303	50652	50652	H2
217	7422270	7399210	23060	23060	A3
218	1885973	1901180	-15207	15207	B3
219	1421828	1402793	19035	19035	C3
220	105554	130643	-25089	25089	D3
221	6475341	6432385	42956	42956	E3
222	1668865	1703296	-34431	34431	F3
223	2667415	2646326	21089	21089	G3
224	6054568	6071914	-17346	17346	H3
225	4494004	4524299	-30295	30295	A4
226	3799128	3772515	26613	26613	B4
227	2008727	1985713	23014	23014	C4
228	4607573	4630194	-22621	22621	D4
229	2872363	2894024	-21661	21661	E4
230	3936306	3916829	19477	19477	F4
231	76079	32782	43297	43297	G4
232	3307864	3278942	28922	28922	H4
233	1485204	1530496	-45292	45292	A5
234	8229206	8250662	-21456	21456	B5
235	1993268	1963687	29581	29581	C5
236	4934533	4952313	-17780	17780	D5
237	3727839	3760199	-32360	32360	E5
238	6508701	6476720	31981	31981	F5
239	6030619	6011318	19301	19301	G5
240	443512	419068	24444	24444	H5
241	7140584	7110920	29664	29664	A6
242	1715244	1687768	27476	27476	B6
243	833338	810823	22515	22515	C6
244	306752	325256	-18504	18504	D6
245	4526174	4493134	33040	33040	E6
246	5684094	5641081	43013	43013	F6
247	2442402	2421711	20691	20691	G6
248	6495832	6447507	48325	48325	H6
249	5049349	5088912	-39563	39563	A7
250	991373	1013872	-22499	22499	B7
251	6693800	6715003	-21203	21203	C7
252	1475234	1454037	21197	21197	D7
253	3386024	3343062	42962	42962	E7
254	3043556	3020302	23254	23254	F7
255	2337708	2366356	-28648	28648	G7
256	448173	465565	-17392	17392	H7
257	2280027	2262041	17986	17986	A8
258	586034	563483	22551	22551	B8
259	4609305	4581896	27409	27409	C8
260	2111069	2079944	31125	31125	D8
261	1395808	1367056	28752	28752	E8
262	6199019	6171308	27711	27711	F8
263	3079456	3119552	-40096	40096	G8
264	5016659	5037168	-20509	20509	H8
265	6559850	6582871	-23021	23021	A9
266	5641081	5684094	-43013	43013	B9
267	4263846	4235904	27942	27942	C9
268	2201151	2236458	-35307	35307	D9
269	4905131	4924510	-19379	19379	E9
270	7768475	7794580	-26105	26105	F9
271	7718857	7687999	30858	30858	G9
272	4154961	4120584	34377	34377	H9
273	3486686	3507872	-21186	21186	A10
274	2432563	2460865	-28302	28302	B10
275	3619975	3642479	-22504	22504	C10
276	6554111	6526149	27962	27962	D10
277	5153539	5135147	18392	18392	E10
278	7812396	7833501	-21105	21105	F10
279	5088912	5049347	39565	39565	G10
280	5006238	5031545	-25307	25307	H10
281	153861	179898	-26037	26037	A11
282	3449896	3432174	17722	17722	B11
283	860631	839524	21107	21107	C11
284	6334464	6356304	-21840	21840	D11
285	7154159	7118527	35632	35632	E11
286	4999521	5019108	-19587	19587	F11
287	4905576	4968745	-63169	63169	G11
288	8201780	8225798	-24018	24018	H11
289	4917224	4876671	40553	40553	A12
290	3378153	3416466	-38313	38313	B12
291	3405659	3376859	28800	28800	C12
292	4361030	4331858	29172	29172	D12
293	3767400	3787958	-20558	20558	E12
294	5346632	5380821	-34189	34189	F12
295	3674645	3655708	18937	18937	G12
296	403848	423159	-19311	19311	H12
				2752698
				28673.9

## Sheet: Tray 300
Clone name	SR4F_eq	SL1R_seq		Insert - bp	Location in tray 300
301	6146636	6183848	-37212	37212	A1
302	2691210	2730120	-38910	38910	B1
303	2971371	2991255	-19884	19884	C1				1	2	3	4	5	6	7	8	9	10	11	12
304	7265486	7245731	19755	19755	D1			A	301	309	317	325	333	341	349	357	365	373	381	389
305	6297420	6316981	-19561	19561	E1			B	302	310	318	326	334	342	350	358	366	374	382	390
306	6451828	6402740	49088	49088	F1			C	303	311	319	327	335	343	351	359	367	375	383	391
307	3792537	3821413	-28876	28876	G1			D	304	312	320	328	336	344	352	360	368	376	384	392
308	4364406	4397387	-32981	32981	H1			E	305	313	321	329	337	345	353	361	369	377	385	393
309	7173994	7148028	25966	25966	A2			F	306	314	322	330	338	346	354	362	370	378	386	394
310	4853193	4898587	-45394	45394	B2			G	307	315	323	331	339	347	355	363	371	379	387	395
311	2355664	2338480	17184	17184	C2			H	308	316	324	332	340	348	356	364	372	380	388	396
312	1130670	1114246	16424	16424	D2
313	6477418	6459414	18004	18004	E2
314	3508278	3477853	30425	30425	F2
315	4147476	4177459	-29983	29983	G2
316	2360265	2380099	-19834	19834	H2
317	506469	479693	26776	26776	A3
318	136806	168130	-31324	31324	B3
319	3276406	3232995	43411	43411	C3
320	1312831	1281426	31405	31405	D3
321	1722262	1689610	32652	32652	E3
322	2857739	2902001	-44262	44262	F3
323	2504513	2483025	21488	21488	G3
324	5146057	5118701	27356	27356	H3
325	241246	262063	-20817	20817	A4
326	4882135	4920603	-38468	38468	B4
327	7312942	7288420	24522	24522	C4
328	4244489	4199816	44673	44673	D4
329	3423715	3486958	-63243	63243	E4
330	5600722	5623530	-22808	22808	F4
331	2314360	2268629	45731	45731	G4
332	4697492	4662702	34790	34790	H4
333	5960896	5940981	19915	19915	A5
334	5593168	5574770	18398	18398	B5
335	2038171	2084067	-45896	45896	C5
336	5535994	5560219	-24225	24225	D5
337	4976837	5007218	-30381	30381	E5
338	4363463	4403575	-40112	40112	F5
339	3900018	3926662	-26644	26644	G5
340	809381	792669	16712	16712	H5
341	4739368	4699907	39461	39461	A6
342	3013189	2973955	39234	39234	B6
343	3966616	3984853	-18237	18237	C6
344	3646839	3669651	-22812	22812	D6
345	927913	955937	-28024	28024	E6
346	1965442	1917417	48025	48025	F6
347	6699542	6668281	31261	31261	G6
348	214012	194425	19587	19587	H6
349	8201780	8225613	-23833	23833	A7
350	3899853	3940623	-40770	40770	B7
351	3112763	3093942	18821	18821	C7
352	7611867	7636617	-24750	24750	D7
353	6272680	6311611	-38931	38931	E7
354	4007716	3986155	21561	21561	F7
355	1522910	1501707	21203	21203	G7
356	3261479	3279121	-17642	17642	H7
357	3832378	3810754	21624	21624	A8
358	617709	636724	-19015	19015	B8
359	4553193	4590876	-37683	37683	C8
360	5611309	5637926	-26617	26617	D8
361	5970453	5996087	-25634	25634	E8
362	4969556	4945985	23571	23571	F8
363	3888806	3867721	21085	21085	G8
364	6175879	6196262	-20383	20383	H8
365	3667050	3704899	-37849	37849	A9
366	1549888	1577449	-27561	27561	B9
367	5631851	5616311	15540	15540	C9
368	6005205	5964694	40511	40511	D9
369	4321613	4291595	30018	30018	E9
370	4558961	4579810	-20849	20849	F9
371	6987967	6970837	17130	17130	G9
372	5209445	5233691	-24246	24246	H9
373	4499889	4483008	16881	16881	A10
374	3541505	3502616	38889	38889	B10
375	3632208	3614572	17636	17636	C10
376	5658533	5682088	-23555	23555	D10
377	4937124	4976026	-38902	38902	E10
378	5175366	5154405	20961	20961	F10
379	4384275	4337001	47274	47274	G10
380	1657862	1637649	20213	20213	H10
381	640191	621876	18315	18315	A11
382	2847665	2895912	-48247	48247	B11
383	2240667	2211530	29137	29137	C11
384	4220680	4242602	-21922	21922	D11
385	7808868	7836221	-27353	27353	E11
386	7287881	7307101	-19220	19220	F11
387	4469471	4498071	-28600	28600	G11
388	1131757	1105545	26212	26212	H11
389	4851952	4885902	-33950	33950	A12
390	4951014	4984358	-33344	33344	B12
391	7426747	7403180	23567	23567	C12
392	5092768	5072184	20584	20584	D12
393	6670793	6647785	23008	23008	E12
394	4393913	4426617	-32704	32704	F12
395	6792013	6772275	19738	19738	G12
396	4337165	4359843	-22678	22678	H12
				2741848
				28560.9

## Sheet: Tray 400
Clone name	SR4F_eq	SL1R_seq		Insert - bp	Location in tray 400
401	4959002	4987972	-28970	28970	A1
402	4360296	4338730	21566	21566	B1
403	3233488	3257560	-24072	24072	C1				1	2	3	4	5	6	7	8	9	10	11	12
404	23237	44608	-21371	21371	D1			A	401	409	417	425	433	441	449	457	465	473	481	489
405	4057376	4073408	-16032	16032	E1			B	402	410	418	426	434	442	450	458	466	474	482	490
406	4817292	4851656	-34364	34364	F1			C	403	411	419	427	435	443	451	459	467	475	483	491
407	1821115	1799964	21151	21151	G1			D	404	412	420	428	436	444	452	460	468	476	484	492
408	4586605	4545131	41474	41474	H1			E	405	413	421	429	437	445	453	461	469	477	485	493
409	5012449	4951272	61177	61177	A2			F	406	414	422	430	438	446	454	462	470	478	486	494
410	543283	491037	52246	52246	B2			G	407	415	423	431	439	447	455	463	471	479	487	495
411	1154583	1179992	-25409	25409	C2			H	408	416	424	432	440	448	456	464	472	480	488	496
412	4828742	4847756	-19014	19014	D2
413	1727966	1691959	36007	36007	E2
414	5096305	5119739	-23434	23434	F2
415	2451225	2466320	-15095	15095	G2
416	3588001	3563772	24229	24229	H2
417	3598857	3582592	16265	16265	A3
418	4956641	4928950	27691	27691	B3
419	4832101	4786791	45310	45310	C3
420	4147157	4163916	-16759	16759	D3
421	348549	401155	-52606	52606	E3
422	4715056	4658346	56710	56710	F3
423	5108229	5151255	-43026	43026	G3
424	2597869	2630154	-32285	32285	H3
425	7412820	7445187	-32367	32367	A4
426	7536824	7497392	39432	39432	B4
427	7416692	7444625	-27933	27933	C4
428	5247477	5307260	-59783	59783	D4
429	2359694	2322620	37074	37074	E4
430	704025	726465	-22440	22440	F4
431	5994449	5968411	26038	26038	G4
432	2544417	2527279	17138	17138	H4
433	3512379	3542031	-29652	29652	A5
434	1967537	1945816	21721	21721	B5
435	3316360	3283685	32675	32675	C5
436	3058712	3030931	27781	27781	D5
437	4236633	4215252	21381	21381	E5
438	345979	391011	-45032	45032	F5
439	2225738	2201847	23891	23891	G5
440	4111971	4095111	16860	16860	H5
441	3760356	3734301	26055	26055	A6
442	5055114	5032375	22739	22739	B6
443	4220192	4255998	-35806	35806	C6
444	4228258	4182249	46009	46009	D6
445	4151786	4175007	-23221	23221	E6
446	4339555	4366247	-26692	26692	F6
447	1534365	1575440	-41075	41075	G6
448	1962066	1980199	-18133	18133	H6
449	4567148	4604048	-36900	36900	A7
450	3096116	3119835	-23719	23719	B7
451	3931651	3898716	32935	32935	C7
452	1852061	1832544	19517	19517	D7
453	3055208	3021014	34194	34194	E7
454	6760719	6733316	27403	27403	F7
455	3101223	3078998	22225	22225	G7
456	5074849	5053640	21209	21209	H7
457	7348466	7329959	18507	18507	A8
458	7349170	7382373	-33203	33203	B8
459	693604	732584	-38980	38980	C8
460	1826840	1864265	-37425	37425	D8
461	2158873	2142418	16455	16455	E8
462	5356440	5330752	25688	25688	F8
463	6511193	6480673	30520	30520	G8
464	5809428	5782338	27090	27090	H8
465	4991288	4974569	16719	16719	A9
466	4418698	4434818	-16120	16120	B9
467	450288	389828	60460	60460	C9
468	3296587	3313347	-16760	16760	D9
469	5296242	5241382	54860	54860	E9
470	4244699	4219744	24955	24955	F9
471	2184411	2202543	-18132	18132	G9
472	4282399	4251111	31288	31288	H9
473	3438374	3414359	24015	24015	A10
474	4094810	4076152	18658	18658	B10
475	1987927	1970981	16946	16946	C10
476	566754	582688	-15934	15934	D10
477	4857793	4836960	20833	20833	E10
478	5258890	5240317	18573	18573	F10
479	4281018	4236048	44970	44970	G10
480	3237459	3277690	-40231	40231	H10
481	474363	433802	40561	40561	A11
482	7189333	7241069	-51736	51736	B11
483	1539484	1491263	48221	48221	C11
484	1277995	1255927	22068	22068	D11
485	1332673	1306783	25890	25890	E11
486	4145608	4115596	30012	30012	F11
487	6617912	6645782	-27870	27870	G11
488	4193966	4177133	16833	16833	H11
489	7037147	7063323	-26176	26176	A12
490	8267306	8299389	-32083	32083	B12
491	4012154	3993184	18970	18970	C12
492	2559284	2535085	24199	24199	D12
493	3879009	3904382	-25373	25373	E12
494	948882	918490	30392	30392	F12
495	5331395	5358404	-27009	27009	G12
496	4012833	4039772	-26939	26939	H12
				2836947
				29551.5

## Sheet: Tray 500
Clone name	SR4F_eq	SL1R_seq		Insert - bp	Location in tray 500
501	5177279	5160670	16609	16609	A1
502	1788754	1761499	27255	27255	B1
503	3127601	3145687	-18086	18086	C1
504	4674964	4659079	15885	15885	D1				1	2	3	4	5	6	7	8	9	10	11	12
505	5736379	5718523	17856	17856	E1			A	501	509	517	525	533	541	549	557	565	573	581	589
506	4385182	4410476	-25294	25294	F1			B	502	510	518	526	534	542	550	558	566	574	582	590
507	3760374	3745135	15239	15239	G1			C	503	511	519	527	535	543	551	559	567	575	583	591
508	6412399	6436667	-24268	24268	H1			D	504	512	520	528	536	544	552	560	568	576	584	592
509	8168184	8152958	15226	15226	A2			E	505	513	521	529	537	545	553	561	569	577	585	593
510	3898399	3930923	-32524	32524	B2			F	506	514	522	530	538	546	554	562	570	578	586	594
511	4000824	3982507	18317	18317	C2			G	507	515	523	531	539	547	555	563	571	579	587	595
512	2855579	2880012	-24433	24433	D2			H	508	516	524	532	540	548	556	564	572	580	588	596
513	3882651	3866729	15922	15922	E2
514	4135058	4099254	35804	35804	F2
515	4517852	4534477	-16625	16625	G2
516	4419152	4387733	31419	31419	H2
517	2816132	2787208	28924	28924	A3
518	4646540	4675159	-28619	28619	B3
519	2875881	2826867	49014	49014	C3
520	7938015	7968981	-30966	30966	D3
521	6694986	6679161	15825	15825	E3
522	559373	575249	-15876	15876	F3
523	4546649	4523704	22945	22945	G3
524	3633237	3612327	20910	20910	H3
525	4696084	4714399	-18315	18315	A4
526	5485987	5468594	17393	17393	B4
527	4542980	4507346	35634	35634	C4
528	4187044	4153318	33726	33726	D4
529	2834122	2850793	-16671	16671	E4
530	7039642	7058906	-19264	19264	F4
531	5794434	5823206	-28772	28772	G4
532	4551264	4571235	-19971	19971	H4
533	5872534	5838438	34096	34096	A5
534	4390022	4369810	20212	20212	B5
535	1824204	1857179	-32975	32975	C5
536	4487842	4517459	-29617	29617	D5
537	2140616	2188178	-47562	47562	E5
538	6492243	6510208	-17965	17965	F5
539	3044510	3070174	-25664	25664	G5
540	4471026	4453302	17724	17724	H5
541	3860322	3882193	-21871	21871	A6
542	4264159	4238371	25788	25788	B6
543	3870113	3850292	19821	19821	C6
544	1839260	1807145	32115	32115	D6
545	5685336	5718146	-32810	32810	E6
546	7511025	7537439	-26414	26414	F6
547	3435306	3409115	26191	26191	G6
548	209053	184337	24716	24716	H6
549	5105934	5081468	24466	24466	A7
550	5905011	5924534	-19523	19523	B7
551	3260609	3303250	-42641	42641	C7
552	4544527	4560692	-16165	16165	D7
553	4287011	4268444	18567	18567	E7
554	6891693	6862079	29614	29614	F7
555	381477	415042	-33565	33565	G7
556	6323806	6302636	21170	21170	H7
557	5774658	5744700	29958	29958	A8
558	5509071	5490079	18992	18992	B8
559	6043328	6001442	41886	41886	C8
560	4194203	4230364	-36161	36161	D8
561	6242845	6223022	19823	19823	E8
562	7935731	7956251	-20520	20520	F8
563	6637851	6655634	-17783	17783	G8
564	5289267	5329186	-39919	39919	H8
565	6242029	6218945	23084	23084	A9
566	4067773	4050505	17268	17268	B9
567	1145428	1128163	17265	17265	C9
568	3745202	3761728	-16526	16526	D9
569	2733311	2761297	-27986	27986	E9
570	1716784	1696983	19801	19801	F9
571	2709648	2682835	26813	26813	G9
572	3211082	3184790	26292	26292	H9
573	3701151	3673847	27304	27304	A10
574	2020200	1986165	34035	34035	B10
575	6105450	6068148	37302	37302	C10
576	6823292	6841624	-18332	18332	D10
577	3998423	3972946	25477	25477	E10
578	4739028	4790871	-51843	51843	F10
579	5177789	5195508	-17719	17719	G10
580	3217639	3179373	38266	38266	H10
581	2801082	2818490	-17408	17408	A11
582	3819102	3783245	35857	35857	B11
583	5932291	5962411	-30120	30120	C11
584	4829145	4849304	-20159	20159	D11
585	3700573	3718521	-17948	17948	E11
586	5644904	5664699	-19795	19795	F11
587	3821803	3806248	15555	15555	G11
588	4605197	4575183	30014	30014	H11
589	5173481	5123059	50422	50422	A12
590	3281864	3220090	61774	61774	B12
591	2109997	2080440	29557	29557	C12
592	4209419	4182445	26974	26974	D12
593	4485375	4468628	16747	16747	E12
594	3990467	4025361	-34894	34894	F12
595	3297615	3336776	-39161	39161	G12
596	5257310	5216012	41298	41298	H12
				2532877
				26384.1

## Sheet: Tray 600
Clone name	SR4F_eq	SL1R_seq		Insert - bp	Location in tray 500
601	6098901	6078383	20518	20518	A1
602	7768827	7739565	29262	29262	B1
603	4716643	4681414	35229	35229	C1
604	3774463	3752872	21591	21591	D1				1	2	3	4	5	6	7	8	9	10	11	12
605	3050076	3033911	16165	16165	E1			A	601	609	617	625	633	641	649	657	665	673	681	689
606	406095	427231	-21136	21136	F1			B	602	610	618	626	634	642	650	658	666	674	682	690
607	6383287	6405301	-22014	22014	G1			C	603	611	619	627	635	643	651	659	667	675	683	691
608	5467619	5449140	18479	18479	H1			D	604	612	620	628	636	644	652	660	668	676	684	692
609	5661922	5694964	-33042	33042	A2			E	605	613	621	629	637	645	653	661	669	677	685	693
610	5082606	5122834	-40228	40228	B2			F	606	614	622	630	638	646	654	662	670	678	686	694
611	4267219	4307184	-39965	39965	C2			G	607	615	623	631	639	647	655	663	671	679	687	695
612	3821707	3787395	34312	34312	D2			H	608	616	624	632	640	648	656	664	672	680	688	696
613	6164842	6103094	61748	61748	E2
614	5214170	5174966	39204	39204	F2
615	4544421	4579408	-34987	34987	G2
616	3365961	3312929	53032	53032	H2
617	6915239	6931193	-15954	15954	A3
618	4264150	4289818	-25668	25668	B3
619	5883004	5865071	17933	17933	C3
620	4450171	4434534	15637	15637	D3
621	5616694	5590635	26059	26059	E3
622	4973328	4992810	-19482	19482	F3
623	1496443	1462522	33921	33921	G3
624	8285368	8300926	-15558	15558	H3
625	2913303	2893030	20273	20273	A4
626	3872931	3852903	20028	20028	B4
627	4515573	4589871	-74298	74298	C4
628	4181629	4215841	-34212	34212	D4
629	3695438	3720248	-24810	24810	E4
630	1880097	1858034	22063	22063	F4
631	868730	913857	-45127	45127	G4
632	1815853	1857287	-41434	41434	H4
633	3515544	3550842	-35298	35298	A5
634	6013684	5991081	22603	22603	B5
635	933610	911397	22213	22213	C5
636	7717620	7679587	38033	38033	D5
637	5671301	5697819	-26518	26518	E5
638	4747862	4773406	-25544	25544	F5
639	4160019	4122273	37746	37746	G5
640	4770429	4788791	-18362	18362	H5
641	2534860	2553242	-18382	18382	A6
642	4563511	4543452	20059	20059	B6
643	2881314	2909341	-28027	28027	C6
644	4625891	4595333	30558	30558	D6
645	7917066	7897857	19209	19209	E6
646	2465917	2482248	-16331	16331	F6
647	3622797	3647954	-25157	25157	G6
648	2548768	2587897	-39129	39129	H6
649	6395795	6380230	15565	15565	A7
650	7562194	7523870	38324	38324	B7
651	3730736	3713416	17320	17320	C7
652	5415054	5445011	-29957	29957	D7
653	5501854	5483351	18503	18503	E7
654	3459311	3431709	27602	27602	F7
655	3459930	3512188	-52258	52258	G7
656	5615403	5596798	18605	18605	H7
657	5140184	5190970	-50786	50786	A8
658	6784648	6750395	34253	34253	B8
659	4071337	4033094	38243	38243	C8
660	2257824	2194508	63316	63316	D8
661	2480835	2545165	-64330	64330	E8
662	4531514	4509570	21944	21944	F8
663	3882564	3952282	-69718	69718	G8
664	407525	429205	-21680	21680	H8
665	3501034	3519624	-18590	18590	A9
666	4059916	4085499	-25583	25583	B9
667	1772137	1808885	-36748	36748	C9
668	1922428	1904560	17868	17868	D9
669	1269431	1290476	-21045	21045	E9
670	5874589	5900271	-25682	25682	F9
671	2234386	2250328	-15942	15942	G9
672	4736507	4700919	35588	35588	H9
673	1613603	1565015	48588	48588	A10
674	5946104	5909627	36477	36477	B10
675	3470090	3448548	21542	21542	C10
676	6834847	6817600	17247	17247	D10
677	3711538	3726914	-15376	15376	E10
678	3359044	3343857	15187	15187	F10
679	5580553	5528152	52401	52401	G10
680	1555839	1599662	-43823	43823	H10
681	4965992	4945130	20862	20862	A11
682	6895664	6879874	15790	15790	B11
683	5538557	5501437	37120	37120	C11
684	5876941	5861719	15222	15222	D11
685	4445353	4463452	-18099	18099	E11
686	1781363	1755362	26001	26001	F11
687	3970333	3947829	22504	22504	G11
688	4815964	4791891	24073	24073	H11
689	4192906	4165454	27452	27452	A12
690	3662394	3681128	-18734	18734	B12
691	4819476	4841584	-22108	22108	C12
692	4334066	4355849	-21783	21783	D12
693	6144048	6167477	-23429	23429	E12
694	3796237	3777070	19167	19167	F12
695	2785403	2760740	24663	24663	G12
696	3528987	3545649	-16662	16662	H12
				2780298
				28961.4

## Sheet: Tray 700
	Clone name	SR4F_eq	SL1R_seq	Insert - bp	Location in tray 700
	701	4444505	4427343	17162	A1
	702	2595140	2553654	41486	B1					1	2	3	4	5	6	7	8	9	10	11	12
	703	1596812	1575900	20912	C1				A	701	709	717	725	733	741	749	757	765	773	781	789
	704	599910	621250	21340	D1				B	702	710	718	726	734	742	750	758	766	774	782	790
	705	6514179	6471479	42700	E1				C	703	711	719	727	735	743	751	759	767	775	783	791
	706	6260580	6241904	18676	F1				D	704	712	720	728	736	744	752	760	768	776	784	792
	707	5864338	5792431	71907	G1				E	705	713	721	729	737	745	753	761	769	777	785	793
	708	4299855	4316572	16717	H1				F	706	714	722	730	738	746	754	762	770	778	786	794
	709	7351221	7334041	17180	A2				G	707	715	723	731	739	747	755	763	771	779	787	795
	710	6575144	6557613	17531	B2				H	708	716	724	732	740	748	756	764	772	780	788	796
	711	2880757	2853151	27606	C2
	712	1715100	1733507	18407	D2
	713	3442385	3489470	47085	E2
	714	4715727	4697557	18170	F2
	715	2327188	2307082	20106	G2
	716	849316	887475	38159	H2
	717	414517	396280	18237	A3
	718	6368221	6397935	29714	B3
	719	2501443	2520825	19382	C3
	720	3711469	3686711	24758	D3
	721	1294350	1275531	18819	E3
	722	4544527	4569155	24628	F3
	723	2652501	2631796	20705	G3
	724	5496011	5479543	16468	H3
	725	4855437	4871748	16311	A4
	726	2792010	2819777	27767	B4
	727	1975395	1991255	15860	C4
	728	7351217	7371967	20750	D4
	729	6990714	7009470	18756	E4
	730	4742798	4724644	18154	F4
	731	3683254	3659634	23620	G4
	732	3680258	3662062	18196	H4
	733	543061	562426	19365	A5
	734	4294672	4239940	54732	B5
	735	6653937	6616999	36938	C5
	736	5455112	5436542	18570	D5
	737	3448566	3495945	47379	E5
	738	1743020	1717286	25734	F5
	739	7784763	7827004	42241	G5
	740	6885373	6914353	28980	H5
	741	1940160	1918836	21324	A6
	742	8040445	8018476	21969	B6
	743	6399686	6377842	21844	C6
	744	3058425	3037090	21335	D6
	745	3102628	3086829	15799	E6
	746	5099763	5126000	26237	F6
	747	1098977	1133434	34457	G6
	748	7437819	7417915	19904	H6
	749	4855437	4871748	16311	A7
	750	4073713	4109962	36249	B7
	751	951578	920603	30975	C7
	752	932561	967521	34960	D7
	753	7136926	7152433	15507	E7
	754	3129279	3150438	21159	F7
	755	4787410	4701018	86392	G7
	756	2934063	2900532	33531	H7
	757	5660984	5705404	44420	A8
	758	3868340	3852050	16290	B8
	759	8290660	8273505	17155	C8
	760	5856933	5823059	33874	D8
	761	3156641	3125994	30647	E8
	762	771857	798236	26379	F8
	763	3261337	3237702	23635	G8
	764	4862982	4825473	37509	H8
	765	4113016	4143220	30204	A9
	766	5155016	5139819	15197	B9
	767	4807303	4781716	25587	C9
	768	643367	591251	52116	D9
	769	5113141	5071470	41671	E9
	770	7738681	7707312	31369	F9
	771	3449535	3489523	39988	G9
	772	1390039	1358441	31598	H9
	773	2645411	2663288	17877	A10
	774	1928966	1976351	47385	B10
	775	7094052	7071885	22167	C10
	776	3772823	3812333	39510	D10
	777	631340	647346	16006	E10
	778	4524503	4500653	23850	F10
	779	5685288	5709995	24707	G10
	780	1786284	1808146	21862	H10
	781	3125597	3141377	15780	A11
	782	2326626	2350318	23692	B11
	783	7609211	7673879	64668	C11
	784	2259181	2238429	20752	D11
	785	6624291	6649217	24926	E11
	786	3961769	3986237	24468	F11
	787	3693005	3708115	15110	G11
	788	5976484	5944548	31936	H11
	789	3686063	3653819	32244	A12
	790	3511265	3540175	28910	B12
	791	4400271	4354499	45772	C12
	792	563433	582424	18991	D12
	793	1824616	1859020	34404	E12
	794	2344640	2303510	41130	F12
	795	4044524	4085411	40887	G12
	796	4508659	4542364	33705	H12
				28411.9

## Sheet: Tray 800
	Clone name	SR4F_eq	SL1R_seq	Insert - bp	Location in tray 800
	801	784185	759807	24378	A1
	802	8199012	8216090	17078	B1
	803	3470631	3493049	22418	C1					1	2	3	4	5	6	7	8	9	10	11	12
	804	1511031	1485155	25876	D1				A	801	809	817	825	833	841	849	857	865	873	881	889
	805	1892369	1915207	22838	E1				B	802	810	818	826	834	842	850	858	866	874	882	890
	806	5938306	5918311	19995	F1				C	803	811	819	827	835	843	851	859	867	875	883	891
	807	2400323	2420550	20227	G1				D	804	812	820	828	836	844	852	860	868	876	884	892
	808	4498114	4518488	20374	H1				E	805	813	821	829	837	845	853	861	869	877	885	893
	809	5885956	5849694	36262	A2				F	806	814	822	830	838	846	854	862	870	878	886	894
	810	6373418	6398590	25172	B2				G	807	815	823	831	839	847	855	863	871	879	887	895
	811	5961692	5983640	21948	C2				H	808	816	824	832	840	848	856	864	872	880	888	896
	812	381451	364497	16954	D2
	813	5502913	5468853	34060	E2
	814	2842017	2812455	29562	F2
	815	877335	905519	28184	G2
	816	4526688	4492685	34003	H2
	817	3535893	3519686	16207	A3
	818	3528229	3546380	18151	B3
	819	3903653	3886124	17529	C3
	820	5761843	5744302	17541	D3
	821	2359316	2336351	22965	E3
	822	4034015	4018332	15683	F3
	823	8063459	8095526	32067	G3
	824	874286	858771	15515	H3
	825	3567164	3536800	30364	A4
	826	7650699	7630982	19717	B4
	827	1087800	1105953	18153	C4
	828	396938	423087	26149	D4
	829	4263956	4239220	24736	E4
	830	4258177	4280972	22795	F4
	831	6280908	6314504	33596	G4
	832	3311851	3333006	21155	H4
	833	4255957	4237843	18114	A5
	834	6590085	6567124	22961	B5
	835	147920	183095	35175	C5
	836	3084101	3103976	19875	D5
	837	6219042	6201360	17682	E5
	838	5170413	5190012	19599	F5
	839	5567908	5546250	21658	G5
	840	3911482	3883813	27669	H5
	841	546871	563011	16140	A6
	842	7878244	7895507	17263	B6
	843	4878230	4816216	62014	C6
	844	4130255	4087720	42535	D6
	845	5945072	5962359	17287	E6
	846	429618	399970	29648	F6
	847	7878244	7895507	17263	G6
	848	6745150	6728663	16487	H6
	849	6112445	6140555	28110	A7
	850	2934063	2900532	33531	B7
	851	7650699	7630982	19717	C7
	852	4443274	4474507	31233	D7
	853	3970333	3947829	22504	E7
	854	1456813	1481539	24726	F7
	855	401905	419266	17361	G7
	856	5127571	5112068	15503	H7
	857	4363345	4321865	41480	A8
	858	2562711	2541325	21386	B8
	859	4870855	4889433	18578	C8
	860	4468713	4483766	15053	D8
	861	6634373	6678229	43856	E8
	862	1920022	1939762	19740	F8
	863	445336	464206	18870	G8
	864	3088883	3108797	19914	H8
	865	1708319	1726014	17695	A9
	866	6009446	5988763	20683	B9
	867	6647334	6630206	17128	C9
	868	8098976	8081211	17765	D9
	869	981103	1032507	51404	E9
	870	2415236	2381756	33480	F9
	871	2978243	3006923	28680	G9
	872	3857152	3900335	43183	H9
	873	8160961	8145071	15890	A10
	874	7517124	7465205	51919	B10
	875	2323653	2285338	38315	C10
	876	883165	867998	15167	D10
	877	4200097	4236118	36021	E10
	878	1958554	1981032	22478	F10
	879	5665456	5700674	35218	G10
	880	2030152	2046622	16470	H10
	881	5570695	5547091	23604	A11
	882	5228567	5204542	24025	B11
	883	7763730	7740644	23086	C11
	884	2259133	2238380	20753	D11
	885	5121638	5150715	29077	E11
	886	7280884	7321055	40171	F11
	887	4046674	4019183	27491	G11
	888	5543993	5571405	27412	H11
	889	459320	400347	58973	A12
	890	4263013	4288909	25896	B12
	891	2150557	2170578	20021	C12
	892	5006385	5024743	18358	D12
	893	1356088	1322790	33298	E12
	894	3078224	3037407	40817	F12
	895	7010664	6983820	26844	G12
	896	216803	198803	18000	H12
				25665.7

## Sheet: Tray 900
	Clone name	SR4F_eq	SL1R_seq	Insert - bp	Location in tray 800
	901	4030630	4010866	19764	A1
	902	5017926	5046986	29060	B1				1	2	3	4	5	6	7	8	9	10	11	12
	903	1845162	1827690	17472	C1			A	901	909	917	925	933	941	949	957	965	973	981	989
	904	6877839	6860132	17707	D1			B	902	910	918	926	934	942	950	958	966	974	982	990
	905	5312619	5339170	26551	E1			C	903	911	919	927	935	943	951	959	967	975	983	991
	906	1871372	1891690	20318	F1			D	904	912	920	928	936	944	952	960	968	976	984	992
	907	3693635	3672995	20640	G1			E	905	913	921	929	937	945	953	961	969	977	985	993
	908	1546510	1523131	23379	H1			F	906	914	922	930	938	946	954	962	970	978	986	994
	909	3456462	3472989	16527	A2			G	907	915	923	931	939	947	955	963	971	979	987	995
	910	5900878	5919052	18174	B2			H	908	916	924	932	940	948	956	964	972	980	988	996
	911	3202731	3223481	20750	C2
	912	2865490	2833881	31609	D2
	913	5082296	5065147	17149	E2
	914	1624318	1661702	37384	F2
	915	1830098	1787164	42934	G2
	916	3731799	3699183	32616	H2
	917	446666	472926	26260	A3
	918	2601976	2618151	16175	B3
	919	3857152	3900333	43181	C3
	925	2515835	2531476	15641	D3
	920	6878125	6901163	23038	E3
	921	4503561	4468853	34708	F3
	922	1493570	1523283	29713	G3
	923	6756231	6773517	17286	H3
	924	3478686	3439811	38875	A4
	926	3880932	3844761	36171	B4
	927	7479924	7509528	29604	C4
	928	2798088	2774060	24028	D4
	929	7253876	7211244	42632	E4
	930	835019	865101	30082	F4
	931	4319624	4364171	44547	G4
	932	3637540	3687458	49918	H4
	933	7030404	7006391	24013	A5
	934	2994647	3012251	17604	B5
	935	3370497	3340294	30203	C5
	936	5435279	5362646	72633	D5
	937	8368	24611	16243	E5
	938	1198900	1220562	21662	F5
	939	5534977	5517453	17524	G5
	940	1498892	1516301	17409	H5
	941	3685055	3742447	57392	A6
	942	6642738	6676430	33692	B6
	943	4445209	4424186	21023	C6
	944	164625	122817	41808	D6
	945	5540521	5503248	37273	E6
	946	3132513	3113829	18684	F6
	947	1347252	1384928	37676	G6
	948	1153949	1178552	24603	H6
	950	5414761	5398949	15812	A7
	951	4152558	4125848	26710	B7
	952	271145	286747	15602	C7
	953	6360800	6385806	25006	D7
	954	3300930	3279076	21854	E7
	955	4415290	4434070	18780	F7
	956	5180236	5162182	18054	G7
	957	2856136	2806446	49690	H7
	958	3701649	3685630	16019	A8
	959	2777026	2755458	21568	B8
	960	3510073	3535066	24993	C8
	961	3642569	3587169	55400	D8
	962	4269151	4252742	16409	E8
	963	7071707	7054128	17579	F8
	965	1310620	1294985	15635	G8
	966	4269151	4252742	16409	H8
	967	1598455	1583057	15398	A9
	968	4174963	4203467	28504	B9
	969	2018757	2054657	35900	C9
	970	5628718	5596779	31939	D9
	971	3173324	3220503	47179	E9
	972	2893020	2864907	28113	F9
	964	3636669	3618946	17723	G9
	973	3458406	3497789	39383	H9
	974	4515055	4487285	27770	A10
	975	4735372	4713923	21449	B10
	976	3692138	3708556	16418	C10
	977	4878549	4901121	22572	D10
	978	66721	92720	25999	E10
	979	4110254	4082623	27631	F10
	981	3354504	3373359	18855	G10
	982	208377	235330	26953	H10
	983	4690885	4718208	27323	A11
	984	2030777	2010997	19780	B11
	980	3389340	3343347	45993	C11
	985	4090853	4143355	52502	D11
	986	4506069	4484969	21100	E11
	987	4988667	4953085	35582	F11
	988	5142805	5122200	20605	G11
	989	1442329	1406695	35634	H11
	990	1492041	1513926	21885	A12
	991	5766065	5726051	40014	B12
	992	4183803	4211506	27703	C12
	993	6528094	6556601	28507	D12
	994	1054140	1100963	46823	E12
	995	3613097	3596828	16269	F12
	996	5731998	5762272	30274	G12
	949	6783650	6825586	41936	H12
				28151.8

## Sheet: Tray 1000
		Clone name	SR4F_eq	SL1R_seq	Insert - bp	Location in tray 1000
		1001	3020308	3038703	18395	A1
		1002	2878473	2913245	34772	B1
		1003	3795622	3814884	19262	C1					1	2	3	4	5	6	7	8	9	10	11	12
		1004	1906226	1929769	23543	D1				A	1001	1009	1017	1025	1033	1041	1049	1057	1065	1073	1081	1089
		1005	5994001	5978836	15165	E1				B	1002	1010	1018	1026	1034	1042	1050	1058	1066	1074	1082	1090
		1006	1736948	1694272	42676	F1				C	1003	1011	1019	1027	1035	1043	1051	1059	1067	1075	1083	1091
		1007	6197299	6176450	20849	G1				D	1004	1012	1020	1028	1036	1044	1052	1060	1068	1076	1084	1092
		1008	4769221	4799823	30602	H1				E	1005	1013	1021	1029	1037	1045	1053	1061	1069	1077	1085	1093
		1009	2288130	2263386	24744	A2				F	1006	1014	1022	1030	1038	1046	1054	1062	1070	1078	1086	1094
		1010	6063795	6037627	26168	B2				G	1007	1015	1023	1031	1039	1047	1055	1063	1071	1079	1087	1095
		1011	4875194	4894625	19431	C2				H	1008	1016	1024	1032	1040	1048	1056	1064	1072	1080	1088	1096
		1012	4169272	4146935	22337	D2
		1013	3360302	3316973	43329	E2
		1014	5668597	5653404	15193	F2
		1015	5002822	4963039	39783	G2
		1016	3346166	3381273	35107	H2
		1017	4520016	4571711	51695	A3
		1018	1598487	1628313	29826	B3
		1019	3361739	3340557	21182	C3
		1020	4878333	4907699	29366	D3
		1021	4513766	4561727	47961	E3
		1022	4396790	4419689	22899	F3
		1023	580933	610336	29403	G3
		1024	3513987	3453354	60633	H3
		1025	7569842	7538153	31689	A4
		1026	4621097	4591339	29758	B4
		1027	352818	312984	39834	C4
		1028	4560309	4537365	22944	D4
		1029	6447178	6477172	29994	E4
		1030	3290338	3270220	20118	F4
		1031	4850036	4886779	36743	G4
		1032	5921468	5958757	37289	H4
		1033	5389834	5367069	22765	A5
		1034	4032887	4065382	32495	B5
		1035	4618064	4636275	18211	C5
		1036	5892637	5913047	20410	D5
		1037	6375920	6347606	28314	E5
		1038	3680657	3704493	23836	F5
		1039	4296207	4334748	38541	G5
		1040	7695925	7680649	15276	H5
		1041	5711267	5743259	31992	A6
		1042	6721643	6685572	36071	B6
		1043	378390	393708	15318	C6
		1044	6748192	6722279	25913	D6
		1045	5617988	5595732	22256	E6
		1046	8228287	8212592	15695	F6
		1047	2445793	2430380	15413	G6
		1048	4026636	3994186	32450	H6
		1049	4950353	4932388	17965	A7
		1050	4317449	4289184	28265	B7
		1051	105554	130643	25089	C7
		1052	4105032	4125181	20149	D7
		1053	4436792	4457743	20951	E7
		1054	2074296	2037275	37021	F7
		1055	1139333	1182453	43120	G7
		1056	7004175	7022643	18468	H7
		1057	511550	491191	20359	A8
		1058	474159	489492	15333	B8
		1059	2381232	2359630	21602	C8
		1060	1201773	1165798	35975	D8
		1061	5197126	5167637	29489	E8
		1062	2808719	2785291	23428	F8
		1063	3154229	3177867	23638	G8
		1064	3931133	3976939	45806	H8
		1065	3309854	3328755	18901	A9
		1066	652621	675344	22723	B9
		1067	2666157	2693035	26878	C9
		1068	5486252	5467764	18488	D9
		1069	3233371	3217573	15798	E9
		1070	7108896	7143090	34194	F9
		1071	606855	625694	18839	G9
		1072	4523185	4540278	17093	H9
		1073	714487	731201	16714	A10
		1074	4069145	4084854	15709	B10
		1075	474159	489492	15333	C10
		1076	2510970	2538766	27796	D10
		1077	2924491	2904128	20363	E10
		1078	8178869	8148230	30639	F10
		1079	5006423	5028150	21727	G10
		1080	5699204	5674946	24258	H10
		1081	4669170	4689864	20694	A11
		1082	7634619	7652926	18307	B11
		1083	5429583	5454574	24991	C11
		1084	3088520	3064989	23531	D11
		1085	5083580	5100487	16907	E11
		1086	4534898	4557553	22655	F11
		1087	8060158	8077775	17617	G11
		1088	6777813	6821129	43316	H11
		1089	1181505	1208342	26837	A12
		1090	4712389	4694852	17537	B12
		1091	4495065	4451929	43136	C12
		1092	1410415	1384614	25801	D12
		1093	6454320	6476770	22450	E12
		1094	3863944	3882615	18671	F12
		1095	1941432	1925057	16375	G12
		1096	5412687	5394765	17922	H12
					26213.6

[truncated: 7 more sheets: Tray 1100, Tray 1200, Tray 1300, Tray 1400, Tray 1500, Tray 1600, Tray 1700]
