# Supplementary material for: Characterization of Sigma Factor Genes in Streptomyces lividans TK24 Using a Genomic Library-Based Approach for Multiple Gene Deletions
Source: Front Microbiol. 2018 Dec 10;9:3033. doi: 10.3389/fmicb.2018.03033 (PMC6295645; doi:10.3389/fmicb.2018.03033)
Supplement: Supplementary file 4 [file Data_Sheet_4.xlsx]

## Sheet: Table-S7_Proteins ID by MS
Table S6: Proteins identifed by mass spectrometry					Protein quantitation (iBAQ)																																						Number of peptides identified
GeneID	Uniprot Acc.	Mol. weight [kDa]	Protein topology (SToPSdb)	Protein name	TK24.WT_set1_rep1	TK24.WT_set1_rep2	TK24.WT_set1_rep3	TK24.WT_set1_rep4	TK24.WT_set1_rep5	TK24.WT_set1_rep6	TK24.WT_set1_rep7	TK24.WT_set2_rep1	TK24.WT_set2_rep2	TK24.WT_set2_rep3	TK24.WT_set2_rep4	TK24.WT_set2_rep5	TK24.WT_set2_rep6	TK24.WT_set2_rep7	delta.12280_set1_rep1	delta.12280_set1_rep2	delta.12280_set1_rep3	delta.12280_set1_rep4	delta.12280_set1_rep5	delta.12280_set1_rep6	delta.12285_set1_rep1	delta.12285_set1_rep2	delta.12285_set1_rep3	delta.12285_set1_rep4	delta.12285_set1_rep5	delta.12285_set1_rep6	delta.12285_set1_rep7	delta.12645_set1_re4	delta.12645_set1_rep1	delta.12645_set1_rep2	delta.12645_set1_rep3	delta.12645_set1_rep5	delta.12645_set1_rep6	delta.17315_set1_rep1	delta.17315_set1_rep2	delta.17315_set1_rep3	delta.17315_set1_rep4	delta.17315_set1_rep5	TK24.WT_set1_rep1	TK24.WT_set1_rep2	TK24.WT_set1_rep3	TK24.WT_set1_rep4	TK24.WT_set1_rep5	TK24.WT_set1_rep6	TK24.WT_set1_rep7
SLIV_04085	A0A076LSQ9	20.928	A	Riboflavin biosynthesis protein RibD domain-containing protein	1194700	1124200	1573100	1988600	2495000	1823200	3064000	6170600	6442500	6146200	6397300	8384300	6223100	0	0	0	139370	3719500	3119800	4264100	0	723310	381640	429600	3779400	6208700	2809600	3590900	0	433790	0	4012500	3076100	0	714550	1360300	2211200	2950400	1	1	1	1	1	1	1
SLIV_00685	A0A076LT48	47.307	B	Integral membrane protein of uknown function containing putative Lambda repressor-like, DNA-binding domain (IPR010982)	5223.1	0	0	0	0	9666.3	0	19149	18220	17010	0	0	0	16241	194950	128350	9676.1	283260	24480	29532	256170	94992	83028	127400	468950	48556	164060	0	0	0	0	14763	11942	0	0	0	0	13063	1	0	0	0	0	1	0
SLIV_05035	A0A076LTA4	35.253	B	Integral membrane protein of unknown function	1266300	2208500	519970	966220	2738900	804120	1474100	7789800	7340900	9687100	1360200	4597500	210640	12865000	3598600	2209400	1712800	3412500	512700	4179300	5401200	3258400	2906500	2724600	8227500	12408000	3739500	475150	178910	476990	0	373920	469580	1382300	1780400	153420	1884700	1220400	5	5	6	5	5	4	5
SLIV_05470	A0A076LTK4	72.249	X	Secreted protein (Sec) - Esterase	3779200	4525300	3153500	6943500	6829800	11917000	12922000	14924000	11331000	22713000	7059000	14798000	2433900	22143000	3303100	2287700	2040400	9354900	2342500	10596000	7601800	5299000	3217100	5486700	16270000	24277000	7695100	25776000	18009000	10446000	6780500	12773000	10732000	11361000	5886200	8034300	11480000	6794600	7	7	6	8	7	8	10
SLIV_02340	A0A076LTW5	26.45	E	Secreted Lipoprotein (Sec) - Putative lipoprotein localisation LolA/LolB/LppX-like protein (IPR029046)	192450	74047	116550	210900	260910	377690	306510	449480	558460	690560	398930	765380	237880	551190	163380	97934	180640	666920	247960	769570	440550	236950	116600	274600	688170	731670	340200	173660	0	143050	4245.8	9905.4	24252	378580	517660	321770	464970	447360	4	4	3	4	3	4	4
SLIV_03045	A0A076LUB5	68.556	P	Secreted protein (Sec) - N-acetylmuramoyl-L-alanine amidase (domain IPR002502)	114770	108260	126860	201390	429110	176930	316280	438670	541100	512060	105890	606580	51548	548050	76288	76609	39338	334470	138940	305350	190470	93653	38400	127420	341050	613120	157750	308170	0	81416	36251	44484	0	222140	182000	114410	216550	238210	3	3	3	4	5	4	6
SLIV_07150	A0A076LUE1	19.395	B	Integral membrane protein of unknown function	678790	632840	614820	1030600	959070	3763400	6857700	3512100	2437900	7581500	2217400	6442600	1440000	5713000	378280	965180	409110	6465400	2909700	8251400	1217900	973770	1347900	2533900	8447200	7673000	4408300	14972000	4821700	4600500	2544100	5592400	8902400	720900	732220	1003200	1906400	4429600	5	5	6	8	5	8	8
SLIV_03890	A0A076LUQ2	33.991	A	Dihydroxyacetone kinase subunit DhaK	0	0	0	0	0	0	9810.9	0	20007	0	0	0	0	0	0	0	0	0	0	37490	0	0	0	0	0	0	0	341360	0	0	0	0	0	0	12424	0	0	0	0	0	0	0	0	0	1
SLIV_04140	A0A076LUU8	38.745	X	Secreted protein (Sec) - Endopeptidase, NLPC/P60 domain (IPR000064)	126000	200930	194070	195460	417190	286150	434350	915360	1205900	1167500	818770	781550	244290	611380	85687	84944	30699	210460	155750	165360	120790	99051	19754	103680	217070	305490	141450	0	163160	0	14418	99775	106690	756460	176500	564600	237600	151310	3	3	3	3	3	3	3
SLIV_09300	A0A076LVE8	6.2618	A	Uncharacterized protein	0	487820	228780	379340	706800	0	1193100	1177600	1266900	1143800	812150	1529400	674220	0	277340	182170	126600	0	420540	876520	588750	315050	133800	195500	905290	0	421190	1661400	2155600	1106600	890640	569490	539890	143130	0	0	0	0	0	1	1	1	1	1	1
SLIV_10000	A0A076LVR5	21.594	B	Integral membrane protein - Protein of unknown function	0	0	0	0	0	96754	83826	0	0	121630	0	0	0	108980	35591	48010	0	78028	0	52195	0	0	0	61625	80544	0	49547	126920	0	0	0	0	0	0	103290	0	154100	0	0	0	0	0	0	1	1
SLIV_10025	A0A076LVS5	42.193	B	Integral membrane protein - T7SS peptidase S8A, mycosin-1, component of T7S export system	0	46358	0	9080	0	36919	0	173010	143350	250210	0	31581	24104	0	0	8284.3	0	0	0	0	0	0	0	0	0	0	0	0	0	0	0	0	0	0	0	0	0	0	0	2	0	1	0	1	0
SLIV_10100	A0A076LVU9	66.114	A	Translation initiation factor IF-2	0	0	0	0	0	0	0	0	18124	0	0	0	0	0	0	0	0	0	0	0	0	0	0	0	40099	0	0	243880	0	116050	0	0	0	0	0	0	0	0	0	0	0	0	0	0	0
SLIV_10150	A0A076LVX4	46.745	B	Integral membrane protein - Putative zinc metalloprotease (EC 3.4.24.-)	202440	198770	175880	185840	265980	208610	323330	52722	0	36998	0	0	0	0	283690	225030	160580	533440	456800	550530	512330	292390	221860	264290	946690	1286800	453430	772720	683200	485690	242600	192260	240130	811660	519900	416850	688220	511100	2	2	2	2	2	1	3
SLIV_10375	A0A076LW63	23.578	B	Integral membrane protein - Protein with LPXTG cell wall anchor domain (IPR019931)	0	273510	7905.7	790920	533410	1516800	1611900	2739500	2208000	6223500	304120	2228000	0	6410800	2019400	1365400	1234000	3998500	464220	4164000	3490500	2081000	2351200	2631200	6820700	15497000	3899200	7684100	3410200	613780	2520100	2977800	3156600	2593700	1647400	376900	2189100	2603900	0	2	1	2	2	2	2
SLIV_06455	A0A076LW80	47.531	A	3-oxoadipate enol-lactone hydrolase/4-carboxymuconolactone decarboxylase	0	0	0	0	0	10078	7509.1	0	0	36027	0	0	0	15529	0	0	8666.1	44676	0	41312	0	0	13262	0	0	37782	0	129100	80577	0	0	0	65371	0	0	0	0	0	0	0	0	0	0	1	1
SLIV_11705	A0A076LWS8	76.547	N	Transcription termination factor Rho (EC 3.6.4.-) (ATP-dependent helicase Rho)	16493	26027	9346.2	72006	54559	79339	25976	35682	111390	46326	72881	113200	0	118760	31507	5077.8	4810.5	0	9195.3	0	20593	0	11395	23784	27674	45085	28008	234560	302920	105040	73722	130570	151900	46523	38978	51455	106630	100890	1	2	1	3	2	3	1
SLIV_00915	A0A076LX52	55.888	X	Secreted protein (TAT) - Peptide/nickel binding protein, MppA-type (IPR030678)	43408	60994	96954	139450	203110	405870	337710	264000	249180	376130	0	185100	59975	485220	0	0	0	0	0	0	0	0	0	0	0	0	0	1968900	2078800	2087400	1083900	1741700	1763900	973350	341470	708870	879890	696200	1	2	2	3	3	4	5
SLIV_01900	A0A076LXE3	20.467	A	Co-chaperone DjlA 1	0	0	8480.3	0	0	185120	157460	225750	285400	333140	299860	683760	0	397740	48047	46943	50529	300100	139160	48917	127560	35533	71287	515040	648680	616750	326100	364080	624010	62205	87908	15082	53953	0	25091	70685	0	0	0	0	1	0	0	2	2
SLIV_13780	A0A076LXX4	50.299	A	NAD(P)H dehydrogenase (Quinone) (EC 1.6.5.2)	0	0	0	0	0	0	0	0	0	0	0	0	0	0	15501	3673.6	0	37302	26685	0	26824	0	7135.7	16730	0	142710	0	0	0	0	0	0	0	0	0	0	0	0	0	0	0	0	0	0	0
SLIV_09585	A0A076LY16	19.227	A	Protein containing TerD domain (IPR003325) - Putative stress response protein	129490	106250	124460	226680	169950	371450	282650	241040	228750	800110	108400	43918	0	375150	394960	241120	246430	1665100	71112	862330	755320	475840	445560	697630	2906500	2951500	1648100	11279000	6228800	4111400	2541700	5848400	4882000	422150	290420	517000	1084100	347900	2	2	2	2	2	2	2
SLIV_03135	A0A076LY96	20.767	E	Secreted Lipoprotein (Sec) - GerM protein	68352	32500	49897	93572	116750	165180	175020	203280	255890	428230	146690	71232	111040	408900	138430	36018	12020	32784	207340	260320	229550	136000	109300	116580	357670	509450	274660	249590	112490	51593	25926	127430	94282	48236	43308	0	30435	46407	1	1	1	1	1	2	2
SLIV_14480	A0A076LYA3	99.664	B	Integral membrane protein - Ser/Thr protein kinase	0	0	3122.7	4540.6	4150.9	0	0	0	0	0	0	38131	0	13610	13926	0	11108	49482	4396.8	32280	28963	5243.7	20373	16084	59911	78255	28140	49006	0	0	5340	17249	14174	7780.5	15543	0	0	7047.5	0	0	1	1	1	0	0
SLIV_03330	A0A076LYB1	25.875	X	Secreted protein (Sec) - Protein containing NmrA-like domain	6089.9	9747.3	7507.4	13167	0	23504	0	0	0	17508	0	0	0	33160	37965	15742	18694	52728	0	40396	62223	35608	24783	28765	76965	69844	47643	283830	215290	93124	75644	142310	153210	0	0	0	49758	0	1	1	1	1	0	1	0
SLIV_15640	A0A076LYY4	23.985	E	Secreted Lipoprotein (Sec) - Unknown function	56510	37842	53796	90911	121260	191360	336060	17726	34635	424430	100280	124620	21981	314890	249550	141690	101030	461550	47317	502460	276710	276840	165430	334750	829160	870670	541920	4291200	2224800	1507800	671810	1837200	1746100	476910	149800	403920	190710	147760	1	2	1	2	2	2	4
SLIV_11485	A0A076LZ26	25.973	X	Secreted protein (Sec) - Protein containing PepSY domain (IPR025711), possibly protease inhibitory function	2180200	1569000	1939500	3876300	4411000	4302200	5284100	7758700	9150000	10729000	5030100	10194000	3028800	12914000	5477600	2720200	1882700	8929200	2844300	13377000	8136900	5245800	3027600	4986500	8982900	19820000	7403000	9192200	5191300	1916300	1601000	1577700	4081900	11592000	8367600	6752900	10939000	9678300	5	5	5	6	5	6	8
SLIV_04825	A0A076LZ58	46.741	X	Secreted protein (Sec) - Carboxypeptidase	31317	35179	33039	42834	64837	52099	68010	70724	119990	86877	59856	54572	18658	86914	133340	13119	43489	222660	0	246820	191970	123310	91515	140480	432250	490730	231200	138060	68088	62803	0	27139	24132	0	0	4596.1	0	0	2	2	2	2	2	2	2
SLIV_05455	A0A076LZF9	121.5	X	Secreted protein (TAT) - Protein possibly involved in signal transduction. ALF stands for Alanine-rich (AL) - conserved Phenylalanine (F)	1582700	1461500	1339600	2655300	3301700	4975400	4400900	4787000	5912300	8652600	3456700	7253600	2297100	8448500	1953600	1114200	1008200	5016400	2508400	5347100	3640900	1504400	1825900	2866600	9262700	12391000	4513500	16003000	7549800	5773500	3768900	8272000	9979400	5157300	3160300	3479000	5287000	4548700	39	41	37	44	36	52	52
SLIV_05385	A0A076LZL8	57.422	X	Secreted protein (Sec) - Phosphodiester glycosidase (IPR018711) with Sporulation-related domain (IPR007730)	607620	585400	741580	860900	1056000	891980	1033500	1087400	1534500	1268700	1002700	1617700	191600	1863000	1515600	891580	644670	2067400	1032200	2444200	2400400	1691600	915130	1176400	3637700	4623000	2028900	3707800	2783900	1601700	1042000	1793400	1998200	2017200	1277100	1427300	2406600	1149300	7	7	9	7	9	6	10
SLIV_16905	A0A076LZM4	54.059	A	Carboxylic ester hydrolase (EC 3.1.1.-)	0	0	3685.1	0	0	0	0	0	0	0	0	0	0	0	0	12703	4270.7	74284	21259	31886	9101.8	2558.5	20661	8855	97565	6579.4	40855	413350	317970	193640	95983	178410	173910	0	0	0	0	0	0	0	1	0	0	0	0
SLIV_17370	A0A076LZW9	40.826	X	Secreted protein (Sec) - Endopeptidase, NLPC/P60 domain (IPR000064)	115630	143340	146590	131190	344110	754540	683290	499380	768210	1767600	306850	529950	144590	389750	218560	159140	130360	522050	129250	694000	130900	93015	123140	401450	583310	318750	297900	0	0	2635.7	4896.9	0	0	384960	438590	202890	714050	291660	3	6	5	7	6	9	7
SLIV_13190	A0A076M051	83.115	B	Integral membrane protein - Penicillin-binding protein	8254	5027.8	7258.1	12086	18496	16692	13559	16467	280680	173070	33196	25095	4711.7	377310	24739	17165	10277	31002	0	52997	0	16211	12029	16079	46288	81631	23512	28960	0	0	6101.2	0	0	69969	48821	52151	87471	59815	1	1	1	1	1	1	1
SLIV_13240	A0A076M061	26.815	X	Secreted protein (Sec) - Protein containing Lysozyme-like domain (IPR023346)	6581700	5246000	6925500	9571500	10552000	17491000	25529000	17793000	17863000	20946000	17518000	32254000	12572000	20526000	15365000	10422000	7936400	57177000	29520000	60399000	26032000	11663000	9506400	25670000	107070000	131510000	56524000	120400000	34947000	20319000	8965100	21015000	32614000	23510000	17929000	29331000	39144000	32309000	6	5	6	6	8	6	9
SLIV_17815	A0A076M066	70.794	B	Integral membrane protein - Protein with RNA polymerase sigma factor, region 2 (IPR013325), Winged helix-turn-helix DNA-binding domain (IPR011991) and Galactose-binding domain-like (IPR008979)	0	0	7041	0	11117	0	11472	0	0	0	0	0	0	0	27518	21797	32714	53408	0	53050	29793	25030	0	31550	95712	83050	47575	17856	0	0	0	6050.9	9105.2	39683	15494	32840	36742	0	0	0	1	0	1	0	1
SLIV_13600	A0A076M0A7	40.526	A	Cystathionine gamma-synthase (EC 2.5.1.48)	21813	19536	6712.1	26826	0	22605	0	67403	71611	47231	13695	0	0	0	85426	0	0	157960	7005.6	68030	131080	66792	78246	14433	302930	385080	114400	197470	302750	72286	0	260770	312260	0	0	0	65885	0	1	1	1	1	0	1	0
SLIV_13700	A0A076M0C2	43.503	E	Secreted Lipoprotein (Sec) - L,D-transpeptidase	3943700	3364600	2885200	7865200	9500600	11909000	12391000	12331000	12993000	20186000	8110800	16195000	2932400	20021000	8728300	5313100	3852600	24137000	7551400	23336000	15286000	8022100	5936800	9877700	38081000	48239000	19068000	40603000	25348000	13847000	6717300	16386000	19409000	17737000	18752000	17385000	24777000	22484000	23	22	21	25	25	27	29
SLIV_18135	A0A076M0E6	30.705	B	Integral membrane protein of unknown function	423510	227820	157180	412920	488560	656650	620890	600360	750240	583410	118250	477480	0	991110	413610	691830	483770	1376900	0	833830	248210	188800	162650	847240	1496400	0	484390	2516400	3011000	1654400	364580	325550	770530	155200	297070	123890	182390	92291	2	2	1	1	1	2	1
SLIV_07140	A0A076M0H8	74.416	X	Secreted protein (Sec) - Esterase	5443000	3473100	4465300	8099100	9645000	15684000	14449000	9532900	8965900	18732000	8501000	17229000	5005700	14445000	2483000	1734700	1170500	5402600	2559000	5926400	5713000	3228000	1614400	3308800	11524000	12177000	5628800	18551000	11876000	6855900	2879200	8461200	9752400	6521200	3533400	5586000	7993000	3959300	12	11	10	12	10	14	13
SLIV_14135	A0A076M0I7	43.826	B	Integral membrane protein - D-alanyl-D-alanine carboxypeptidase	656390	608640	431190	1065500	768640	1452400	1179400	2783900	3609500	4536300	1095500	2288900	226290	3954000	2963100	1686700	1632300	5662400	687920	3875700	5460400	2695400	2778600	3338300	11120000	13820000	5201000	8613100	5031700	3570600	1428000	2513600	3245500	1293600	1458700	945770	1075300	1154800	10	8	8	11	8	9	8
SLIV_18435	A0A076M0K2	50.326	B	Integral membrane protein - Putative pH-dependent serine endoprotease DegQ	553100	648070	489660	1166600	1513200	1245600	521820	307880	810110	652520	651200	577070	402370	1458200	166600	344180	14833	296190	174680	246620	729360	94844	395310	588010	1822700	1461100	1166000	3414200	1986200	1667800	1084500	95727	80113	526470	1139400	571020	173060	292990	6	7	7	7	7	5	5
SLIV_01150	A0A076M0P0	32.711	X	Secreted protein (TAT) - Endo-beta-N-acetylglucosaminidase H (EC 3.2.1.96)	243200	254830	279020	402490	493850	284220	174610	530200	548110	265120	383250	928800	343750	543680	920570	313380	104320	1406500	855010	1238500	1386200	251040	445030	293290	2253200	3638600	810730	4471400	2341000	1469700	624590	1863500	2760900	1146000	513150	650390	758440	719360	3	4	4	5	4	2	3
SLIV_14485	A0A076M0P7	74.111	B	Integral membrane protein - Ser/Thr protein kinase	320300	100660	199290	426070	541000	1018000	692590	825650	606640	1711600	349340	528710	145750	1527800	912780	624160	626510	1634200	257720	2073100	2661200	1172300	954990	1375400	3254500	3260600	1764700	4194500	2526500	2143200	978490	1743200	1593500	1115500	931040	800910	904310	420270	8	5	7	8	7	9	10
SLIV_18760	A0A076M0R3	95.823	B	Integral membrane protein - Penicillin-binding protein	115570	173480	113600	180970	320400	249620	294230	379480	603570	580360	228180	919900	206100	576120	90182	161160	110970	536330	202960	497280	204900	172870	160450	224830	517660	965670	217680	190110	65167	76507	66582	46044	119720	294050	264810	229990	249960	178170	6	7	6	6	8	6	6
SLIV_07590	A0A076M0T5	52.504	X	Secreted protein (Sec) - Peptidase S1A, chymotrypsin family	12616000	12626000	16930000	21532000	24850000	33795000	36604000	25572000	25730000	53595000	21838000	38133000	10733000	40615000	23527000	13587000	10414000	61941000	19411000	68615000	39897000	26033000	17655000	26322000	78613000	89327000	44616000	97556000	52204000	32752000	17803000	43640000	48723000	17884000	11320000	16781000	23268000	16485000	16	14	15	16	14	21	25
SLIV_18920	A0A076M0T6	176.52	B	Integral membrane protien - Quinoprotein alcohol dehydrogenase-like protein	0	5063.6	4240.6	8419.9	0	0	0	18216	0	1596.6	6431.3	10647	1522.7	1246.3	11014	0	71.308	22910	4744.7	21266	0	1105.2	975.16	0	4170.2	70707	19709	6326.8	723.34	566.25	752.03	3314.9	2998.8	0	624.46	0	0	0	0	1	1	1	0	0	0
SLIV_07990	A0A076M0V5	38.168	A	Uroporphyrinogen decarboxylase (UPD) (URO-D) (EC 4.1.1.37)	23340	14386	0	35598	49772	36650	28039	50838	0	0	28501	0	12520	0	67724	33822	20899	207250	47067	122600	154820	53848	37734	94567	590210	677760	191200	1191600	555290	305920	160110	390750	453160	50935	29014	35098	0	59806	1	1	0	1	1	1	1
SLIV_08090	A0A076M0X2	39.247	E	Secreted Lipoprotein (Sec) - Solute binding lipoprotein	135410	150200	68691	165700	159180	207220	261300	883610	799340	799430	597340	1102800	121560	696190	519310	275840	234210	556240	378790	996960	750980	408850	399650	243530	905080	1344200	577190	5467000	1728100	2594900	591270	1386400	1064700	246710	211900	308500	391530	207900	2	2	2	2	2	2	2
SLIV_01630	A0A076M0Y4	76.163	B	Integral membrane protein - Membrane protein of unknown function containing Strerol-Sensing domain	0	0	0	0	0	0	0	0	0	0	24499	55616	0	0	0	15784	12905	33175	6218.9	30084	0	15659	12646	30567	71982	59288	21386	0	94942	54787	0	0	50797	80511	0	47989	80124	71155	0	0	0	0	0	0	0
SLIV_14975	A0A076M0Y6	61.742	X	Secreted protein (TAT) - Secreted Endopeptidase, NLPC/P60 domain (IPR000064)	1255300	1314100	1339100	2291400	2881700	3118800	2877600	3219000	3384400	4267700	1658500	3173300	1070100	4383100	1862500	1139400	644410	4751000	1724400	4918100	4133700	2037800	1350500	2070600	8499300	11116000	3729900	8327500	4106300	2705600	1340600	2960300	3900900	3553300	2491300	2490000	3762500	3276800	10	10	11	12	12	14	11
SLIV_15025	A0A076M0Z6	43.78	F1	Elongation factor Tu (EF-Tu)	1742900	573170	1128700	2900800	2657200	5568700	5251600	4401500	5652900	7135300	3817600	6694300	2204100	5698700	6948600	3715100	2662900	16141000	5719400	13594000	13203000	5861600	4244800	9770000	32313000	23984000	17707000	131490000	74776000	53612000	19786000	39202000	61971000	1705100	1118400	1007800	901340	1074800	16	12	12	15	16	24	23
SLIV_15100	A0A076M112	32.844	N	Transcription termination/antitermination protein NusG	171230	159430	61138	81234	61857	286470	168290	268150	840880	305160	49563	732100	0	695220	756350	361830	736480	1894100	564440	1980700	1021000	496080	306290	744170	1824800	3907300	1250200	7973000	5696200	4867100	1015100	2654700	3536900	169040	195300	268500	2444900	845250	6	4	2	2	2	3	4
SLIV_09285	A0A076M1H1	11.003	A	Uncharacterized protein	507160	226320	269820	487520	0	700670	559330	541780	2164400	1249600	370600	669790	0	1833800	0	0	249550	0	0	901110	0	0	240230	0	2217900	422500	575700	1904100	3458700	0	0	407880	1380300	997820	724180	0	0	0	1	1	1	1	0	2	2
SLIV_15920	A0A076M1H4	47.035	E	Secreted lipoprotein (TAT) - Glycoside hydrolase/deacetylase	32735	18340	14885	23507	27737	28597	27997	68914	124400	0	62757	112730	56586	128240	87940	11344	7478.8	222950	250340	63984	92632	0	29686	22082	287810	627200	237410	29052	142040	19846	0	0	1176	229680	0	0	0	0	2	1	1	1	1	1	1
SLIV_08935	A0A076M1K0	30.885	B	Integral membrane protein of unknown function	242970	470140	441520	660390	470820	1343600	1289300	650900	123940	1632100	972790	1569700	320950	646590	249870	444990	386620	1534500	366790	1570200	834700	742780	263740	793990	2896100	3229000	1473700	4270100	2718100	2287100	946630	2676500	2380400	926380	1018500	1623300	2631200	991550	2	4	3	4	2	5	5
SLIV_16545	A0A076M1R9	59.586	B	Integral membrane protein - Ser/Thr protein kinase	11584	10014	7193.1	25643	22782	182480	47406	103040	93489	191110	0	19350	0	303170	288610	172880	25116	313340	18491	410950	424560	206250	199690	224080	672540	846910	348750	1001100	718660	486250	281160	499580	425580	353740	173470	293070	382080	192450	2	2	2	1	1	2	2
SLIV_16595	A0A076M1S7	39.767	A	Phosphoserine aminotransferase (EC 2.6.1.52) (Phosphohydroxythreonine aminotransferase)	0	0	0	7143.1	0	3424.9	26894	39986	105970	109660	0	66474	0	39478	156970	116060	140230	483910	0	197410	366310	121350	214770	290030	1187100	1358000	478540	6111700	3257400	1909500	938900	1270700	1553000	59923	53648	66144	99175	24606	0	0	0	1	0	1	1
SLIV_21010	A0A076M259	27.084	B	Integral membrane protein of unknown function	304530	417910	242820	369630	373960	484050	736780	391870	1036900	1372600	474310	1098400	360670	1243800	962600	449810	552650	1170000	329610	1497700	351610	1292500	530030	1135800	2999700	4374300	2212000	0	2553900	1526900	458590	3068600	3234400	0	72596	812560	728740	497800	3	3	2	2	2	2	3
SLIV_21060	A0A076M264	11.383	A	Uncharacterized protein	0	0	70344	0	0	150760	0	116400	0	0	0	161410	86863	0	0	59515	0	0	0	0	0	0	0	0	0	0	0	2061000	1847600	309750	351860	1415300	1361100	0	0	0	142220	0	0	0	1	0	0	1	0
SLIV_10315	A0A076M2A3	38.55	F1	Putative adenosine/adenine deaminase 1 (EC 3.5.4.-)	0	0	3925.3	0	0	14383	0	0	0	0	0	0	0	0	64460	79072	81608	212570	113030	151380	105060	44867	40595	153670	600710	316030	239050	1302000	1101000	540670	224050	326680	575560	0	0	0	0	67353	0	0	1	0	0	1	0
SLIV_21445	A0A076M2B8	8.4143	F1	Protein containing Phosphopantetheine binding ACP domain (IPR009081)	0	0	0	0	0	0	0	0	0	104780	0	0	0	0	0	0	0	0	0	0	0	0	0	0	0	0	0	4858500	312420	1524800	1376100	2116400	1871800	0	17731000	0	0	0	0	0	0	0	0	0	0
SLIV_10835	A0A076M2F2	85.644	X	Secreted protein (TAT) - Lyase	0	0	0	0	0	0	0	0	0	0	0	0	0	0	0	0	0	0	5117.9	0	0	0	0	0	0	0	0	325460	306950	180120	18126	52059	218750	0	0	0	0	0	0	0	0	0	0	0	0
SLIV_11215	A0A076M2L9	44.306	E	Secreted Lipoprotein (Sec) - L,D-transpeptidase	249360	155880	159260	190140	250160	230630	254590	415520	320240	523970	343480	675110	283870	343780	153500	14099	47561	320100	439030	500620	79805	61432	90777	311710	687020	1133800	317300	186320	53622	57153	58520	39889	317330	400640	288970	330950	656010	622680	3	3	2	2	2	2	2
SLIV_04830	A0A076M2N8	54.036	X	Secreted protein (Sec) - Metallopeptidase	1800900	1600500	1841000	3255400	4117600	5135900	4689400	3662500	3931600	4065000	2724800	4613400	2855700	5149700	4078700	2000000	660000	9184800	5397400	11059000	6598600	3177500	2199900	3782100	12940000	17256000	6474800	32172000	18075000	11660000	2743700	5762900	13018000	2999900	937790	1943600	1874200	1799200	15	11	11	15	12	15	16
SLIV_22215	A0A076M2Q1	20.141	A	Ppx/GppA phosphatase	63940	57486	59226	57429	0	135930	114830	73142	92581	240970	24558	60979	70583	0	149940	85436	65882	349160	213190	250980	286310	143270	149730	213530	754010	1105500	270160	898810	613730	355100	280930	0	355220	0	0	0	0	0	1	1	1	1	0	1	1
SLIV_11170	A0A076M2T6	25.636	P	Secreted protein (Sec) - Zinc D-Ala-D-Ala carboxypeptidase (EC 3.4.17.14)	216130	345970	154630	348510	269790	620540	19477	189310	310050	236640	145290	52060	56120	318520	30477	25532	26116	581680	613240	0	79526	41971	0	0	0	533270	426900	7239300	1734900	1476600	785760	1468200	3002400	0	32005	429980	733310	0	3	3	2	1	1	1	1
SLIV_05160	A0A076M2V4	47.325	A	Glucosidase	0	0	0	0	0	0	0	945580	982150	1215100	0	680350	0	2115500	0	0	0	197530	0	0	0	0	0	0	0	0	0	876380	0	0	0	371190	479010	0	0	0	0	0	0	0	0	0	0	0	0
SLIV_22470	A0A076M2V9	60.354	B	Integral membrane protein with Cell envelope-related transcriptional attenuator domain (IPR004474) and Putative LytR/CpsA/Psr regulator, C-terminal domain (IPR027381)	179940	195980	161400	243440	392370	222780	362970	472790	480910	432970	348200	509570	298170	555600	191140	135530	96816	286980	279880	356280	159840	85104	37889	109660	320180	744900	167990	99654	5029.1	22438	11564	47230	65311	319380	259680	248340	359350	339090	5	4	4	4	5	2	4
SLIV_05285	A0A076M305	52.034	E	Secreted Lipoprotein (Sec) - Solute binding lipoprotein	0	35343	19569	27987	34065	78438	69778	101110	67463	262110	177120	215390	127690	467510	173150	52124	88608	394010	132120	406790	290020	78586	113770	129350	518310	427940	289770	827780	670760	547930	274520	583090	792170	163810	70887	282300	49326	227230	0	1	1	3	2	5	4
SLIV_22960	A0A076M340	10.05	A	Uncharacterized protein	201070	0	201100	0	350270	327590	466670	0	0	0	0	0	0	0	276380	151700	87449	437880	277180	0	442170	301200	237650	342120	859120	1236200	496400	1293900	1030500	0	454320	424490	459650	203130	163280	0	0	173030	1	0	1	0	1	1	1
SLIV_19190	A0A076M390	23.713	N	Transcriptional regulatory protein luxR-type	0	0	0	0	0	0	0	15431	0	0	0	0	0	0	22498	0	10567	0	0	0	0	0	0	18488	31729	0	0	198370	203290	131890	75420	59509	126600	0	0	0	0	0	0	0	0	0	0	0	0
SLIV_12025	A0A076M3A3	7.422	A	Uncharacterized protein	126250	0	0	0	0	0	0	719110	589550	0	85055	0	0	0	0	0	0	0	108300	291280	0	0	0	0	0	0	0	0	0	262980	839500	0	0	0	0	0	203780	193530	1	0	0	0	0	0	0
SLIV_12405	A0A076M3A6	60.265	A	Mitochondrial biogenesis protein AIM24 (IPR002838)	0	0	0	0	0	0	0	0	0	0	0	0	0	0	0	0	20496	0	0	0	0	0	0	0	27435	37760	117150	1539100	87328	68940	31230	363470	394510	0	0	0	0	0	0	0	0	0	0	0	0
SLIV_06095	A0A076M3C8	38.241	A	Transferase	23980	6737.8	0	4504.3	5560.4	0	34426	0	6947.2	0	6470.7	0	0	0	0	0	0	0	23891	0	54207	0	0	0	34764	0	0	0	0	0	1842.5	0	0	0	0	0	0	3299.6	1	1	0	1	1	0	1
SLIV_23290	A0A076M3D7	56.197	X	Secreted protein (Sec) - Histidine kinase-like ATPase	0	0	0	5475.4	13119	14063	17140	29094	24485	41776	0	0	17925	23937	0	3889.7	308.68	14740	13249	26839	0	0	0	0	0	26780	0	69587	73392	23612	20497	19996	20860	0	0	0	13271	0	0	0	0	1	1	1	1
SLIV_12655	A0A076M3F5	8.6799	A	Uncharacterized protein	19661000	19352000	22324000	35463000	39318000	42806000	41551000	36241000	42510000	44779000	36338000	71738000	25126000	62463000	26673000	10254000	4096500	31105000	19086000	34660000	51329000	35415000	14625000	18162000	80323000	62228000	35806000	104970000	135500000	79420000	37036000	105790000	95188000	53659000	21484000	40047000	57223000	30800000	3	4	3	4	3	6	6
SLIV_12360	A0A076M3H7	19.476	A	Uncharacterized protein	0	0	55342	0	0	172340	24910	70761	51044	86103	107510	106860	44542	0	27480	0	0	66985	28141	46729	29669	29817	8002.6	16848	77721	95063	50742	59751	0	47334	20002	14410	73073	24641	0	53348	0	0	0	0	1	0	0	2	1
SLIV_12535	A0A076M3L2	8.0361	A	Uncharacterized protein	355300	429290	200180	358190	417650	1040800	956240	598560	1130400	1671800	326100	320420	131070	882400	780720	683900	471230	1861500	24598	1644300	1159600	468330	633110	963970	4281600	5045600	1552600	12988000	12720000	11043000	5819200	4057300	3776500	3999200	1887800	2277900	3797700	1743000	4	4	4	5	4	6	7
SLIV_12635	A0A076M3M9	67.363	B	Integral membrane protein - Putative pH-dependent serine endoprotease DegQ	51822	47344	28010	127800	151520	117620	62760	147150	164770	74576	125480	160820	0	248800	111290	61607	39925	387700	164840	282500	195880	157430	71173	99481	243820	691410	179370	1679400	1392900	890260	319870	912680	1295500	172460	73968	132880	166380	71368	4	4	3	4	5	4	2
SLIV_24045	A0A076M3Q5	29.568	E	Secreted Lipoprotein (Sec) - Putative lipoprotein localisation LolA/LolB/LppX-like protein (IPR029046)	1981600	1721200	1029100	3784900	4272100	4865100	5865900	7858200	7348700	8796400	4110700	9069900	2496200	12210000	3300700	1997500	1105700	5387400	2571600	8148900	5932300	3424000	1725600	3538000	8710500	13138000	4607300	5235400	3288500	1925100	1071800	1529400	1801800	2222900	1728300	1505900	2701000	2743100	11	10	8	11	12	12	12
SLIV_06970	A0A076M3U4	39.693	X	Secreted protein (Sec) - Mannan endo-1,4-beta-mannosidase (EC 3.2.1.78)	2225	0	3469.6	0	0	15055	23854	0	0	0	0	0	0	141990	5140.8	2615.1	0	13342	9274.6	29201	0	6569.2	4801.6	9575.5	10263	0	12467	3246700	662450	647080	258930	462790	996500	63009	10793	0	192650	66280	1	0	1	0	0	1	1
SLIV_07045	A0A076M3V3	133.96	X	Secreted protein (Sec) - Ser/Thr protein kinase with Concanavalin A-like lectin/glucanase domain (IPR013320)	206420	196720	240130	325290	435310	500230	455460	506180	435610	616580	185490	664030	159270	689470	73708	47661	47958	164270	106020	191560	87906	69695	45912	86826	194190	238010	89879	200730	80181	22339	23409	37064	65014	270830	233080	224940	390220	212010	11	14	12	15	12	16	15
SLIV_07245	A0A076M3Y1	30.245	E	Secreted Lipoprotein (Sec) - Deacetylase	692870	644480	571630	1128700	1605100	1537600	1770000	2599000	2278000	2253400	1015600	1600200	498760	2866600	1062700	685640	344930	2514800	822230	2689600	2045800	941080	652010	1048800	3706800	5255000	2126500	1582300	1592600	713570	381650	596500	459300	1534700	1260500	415620	1538500	1450400	12	9	9	10	11	9	10
SLIV_24505	A0A076M3Z6	23.427	A	Thioredoxin-like protein (IPR012336)	0	0	0	0	0	10781	0	152400	207370	132340	145980	335270	93529	171620	0	40012	0	0	0	0	0	0	0	0	0	0	0	3632500	3261300	1851200	284300	1923600	2153800	0	0	221290	0	189300	0	0	0	0	0	1	0
SLIV_24530	A0A076M401	17.44	A	Ribose-5-phosphate isomerase B (EC 5.3.1.6)	43155	351620	192100	475570	542850	1610700	923210	2168700	2635900	2880500	1243600	3463300	613870	2872000	1292500	844220	677950	2237600	412050	2083700	3627300	1828800	1449300	1909800	5103800	4998200	2614600	11928000	9257900	5556000	2535900	5910500	5559500	1343300	634730	1091400	1569900	928900	1	2	1	2	2	4	4
SLIV_13710	A0A076M493	11.194	X	Secreted protein (TAT) - unknown function	0	0	0	0	0	0	0	757630	636500	1061100	813010	1560600	0	1422000	422910	0	0	0	0	0	473930	0	0	0	0	0	0	0	306540	0	0	0	0	1169700	0	0	0	0	0	0	0	0	0	0	0
SLIV_14240	A0A076M4A6	46.463	B	Integral membrane protein - Putative transcriptio regulator (Cro/C1-type helix-turn-helix domain)	0	0	0	0	0	0	0	0	0	0	0	0	0	0	0	0	28461	0	0	0	0	0	0	0	177200	151530	78578	0	0	41051	0	0	55346	0	0	0	0	0	0	0	0	0	0	0	0
SLIV_21285	A0A076M4I0	29.324	E	Secreted Lipoprotein (Sec) - Unknown function (DUF3558 family)	0	24381	116730	181920	14652	81039	28826	11014	0	0	0	27679	140030	11615	161200	41235	81230	583470	201810	268270	249570	0	130380	42944	0	283530	129810	508250	417570	259130	112430	280970	420200	470850	343410	208550	66911	303340	0	1	2	3	1	2	1
SLIV_25665	A0A076M4R0	41.545	X	Secreted protein (TAT) - Aldose 1-epimerase	281240	327580	304070	562050	864230	485420	433900	719880	569010	669990	344100	906720	487620	599660	488160	161130	0	1003700	704340	708370	869130	337730	40255	483330	1485000	2268700	744310	1659400	885180	567300	295120	540390	462560	208390	108690	0	237900	111650	3	3	3	3	3	2	2
SLIV_14700	A0A076M4V5	31.391	B	Integral membrane protein of unknown function	186990	69412	74711	85654	411680	93386	85070	479020	299200	191610	418310	1288800	346470	742480	384080	96686	65123	1062600	633830	805360	469590	127040	169110	167660	1543600	2545400	531860	714720	380660	208310	65403	620250	582340	208200	54899	153020	91678	293670	2	2	1	1	2	1	1
SLIV_22475	A0A076M4X8	60.917	B	Integral membrane protein containing cell envelope-related transcriptional attenuator domain (IPR004474) Putative LytR/CpsA/Psr regulator, C-terminal domain (IPR027381)	366040	345960	257070	548650	597270	469820	670180	448250	851050	874600	679290	1057500	357190	929520	676560	391510	298640	1187000	661750	1104600	876450	511140	387360	524520	1437400	1605300	776090	1833500	1449900	716860	511660	1330500	1252000	757680	648450	538910	868620	677660	6	6	6	6	6	5	5
SLIV_26220	A0A076M530	21.613	A	Nucleic-acid binding protein (Uncharacterized protein)	116510	55818	73371	44393	217600	114630	229640	92933	196540	225310	165000	420550	247830	172710	185720	179860	137830	405140	576780	669050	351570	404060	209000	233640	793480	1708800	464300	299470	204250	147050	68280	57978	131150	0	59641	56460	0	32251	3	2	4	2	4	3	3
SLIV_22865	A0A076M538	40.678	X	Secreted protein (Sec) - Carboxy-terminal processing protease	393150	330950	287990	335220	460980	605040	579370	627500	583210	619130	401390	941190	103650	706070	283950	236770	77761	464380	205020	178430	87281	94085	73296	135980	391330	239980	302400	245890	312350	46340	44277	78335	167150	325200	239070	339210	476620	474690	6	6	5	5	6	5	5
SLIV_26370	A0A076M557	51.672	B	Integral membrane protein implicated in iron acquisition and transport	10615000	12547000	12545000	19719000	19530000	32680000	41361000	26846000	31263000	51791000	19643000	34104000	14453000	58040000	11987000	8623200	7012900	41424000	16085000	40266000	16484000	8532400	9703700	16492000	56601000	82101000	29630000	70485000	29335000	22070000	11585000	29447000	31380000	14674000	15857000	11625000	17905000	19927000	15	18	15	19	18	24	26
SLIV_15730	A0A076M5F1	11.358	X	Secreted protein - T7SS ESAT-6-like protein (EsxA) (IPR010310)	7787900	8688300	9163200	9974600	12661000	14147000	20910000	34692000	35073000	59031000	15783000	43178000	2059500	33698000	25406000	32475000	16672000	45912000	17345000	47080000	42233000	19113000	16006000	35716000	163310000	117100000	60703000	295390000	364010000	114760000	167160000	96379000	84050000	7204100	23331000	4850300	8096400	7954600	11	8	11	8	8	7	9
SLIV_09995	A0A076M5K7	15.776	A	Uncharacterized protein	217050	286220	56800	77636	302310	444570	560480	274950	238660	645550	255610	303780	196530	610500	129730	122050	67274	506340	49172	441830	0	85556	0	126040	63041	232610	0	190590	795590	393270	194460	65445	99130	192670	227820	0	0	47037	2	3	2	2	2	4	4
SLIV_10045	A0A076M5M2	111.31	A	Nucleotide binding protein (Uncharacterized protein)	91536	91523	90918	128570	141930	184760	151920	151820	178720	203350	185010	305050	199010	226740	59868	28037	24049	0	79790	53212	0	40583	20610	49681	141600	87504	60303	184520	626950	255900	302740	279560	185110	285390	105040	179490	275640	206640	1	1	1	1	1	1	1
SLIV_16430	A0A076M5Q0	55.268	A	Uncharacterized protein	1515600	1594800	1623100	2266000	1804300	1692500	1965000	3642700	1583900	2596600	2306400	3480300	1057600	3614100	688100	442080	465210	2829100	943550	2335600	610160	104540	199930	858240	2652500	3132500	1453400	361920	161310	107050	0	47994	97286	49106	115940	0	0	96887	8	9	8	8	7	7	8
SLIV_16755	A0A076M5S2	18.009	E	Secreted lipoprotein (TAT)	12037000	12290000	14064000	21586000	26953000	15578000	21984000	31777000	35508000	27797000	34448000	49366000	25895000	42252000	9348200	3106400	1401300	22173000	16674000	18748000	17103000	10590000	4106400	7723700	34280000	78963000	20966000	39853000	14588000	10702000	6715000	26111000	27295000	26985000	15705000	9092800	21505000	28105000	5	6	6	5	5	5	6
SLIV_10395	A0A076M5X6	40.521	X	Secreted protein (Sec) - Thiamine ABC transporter periplasmic binding protein (IPR005948)	128770	216510	149230	285220	379760	525750	501590	745510	933060	1303900	569120	981180	342900	825490	167820	137430	111400	635380	239060	706260	339720	281000	165830	247910	1063400	1733500	545290	1130500	626350	739780	306960	729910	624340	550480	521990	611220	726470	584460	3	5	4	5	4	5	7
SLIV_24355	A0A076M5Y5	38.393	B	Integral membrane protein - Sugar-binding protein	378320	423670	295630	456580	565220	525520	648380	386780	573140	551450	432010	992380	68639	633230	432390	329550	202320	902220	379890	921250	568150	390280	331310	414580	1256000	1499000	600650	457840	757710	642890	442420	260210	389210	1954800	1271000	1266300	2044900	1142000	5	5	4	5	5	5	5
SLIV_16920	A0A076M5Z5	7.3872	A	Potential cold shock, CspA (IPR012156)	0	0	28386	162450	244450	186840	0	355210	281020	1230100	156860	260620	0	1285000	0	79005	0	0	200500	6805.7	193920	171010	0	0	0	1562900	0	1253400	1767000	716840	992420	2162100	1477500	100720	60495	21188	0	0	0	0	1	1	1	1	0
SLIV_24795	A0A076M674	24.065	A	Phosphoglycerate mutase	0	0	0	8051.5	0	0	0	0	0	0	0	0	0	0	19040	0	13604	0	16922	0	0	0	0	0	50306	0	39356	328780	0	47424	121450	59160	362890	92826	36996	84023	115840	92665	0	0	0	1	0	0	0
SLIV_24955	A0A076M6A5	36.558	A	Adenine deaminase (ADE) (EC 3.5.4.2) (Adenine aminohydrolase)	8328.5	17161	3886.1	20114	0	23726	30935	0	10245	46071	0	0	0	0	36347	10759	0	6245.6	0	7623.1	8345.4	1018.5	1778	5953.7	152830	70828	76969	763610	543900	303570	28130	128930	162690	0	0	0	0	0	1	1	1	2	0	1	1
SLIV_25130	A0A076M6D5	7.8347	A	Uncharacterized protein	453550	322530	377650	432470	643550	556110	519760	991940	1226500	946640	804130	1686500	1095000	1258400	0	0	0	75086	0	0	0	0	0	0	0	0	0	0	0	0	0	0	0	0	0	0	0	0	1	1	1	1	1	1	1
SLIV_17715	A0A076M6E7	55.778	E	Secreted Lipoprotein (Sec) - Putative CO dehydrogenase flavoprotein-like protein (IPR016169) involved in the biosynthesis of numerous isoquinoline alkaloids (IPR012951)	0	0	0	0	0	0	0	0	0	0	0	0	0	0	0	3233.2	6545.1	11085	0	0	15817	0	3859.1	9810.6	0	0	0	0	82260	45536	0	0	0	0	0	0	0	0	0	0	0	0	0	0	0
SLIV_18415	A0A076M6N3	36.474	E	Secreted protein (Sec) - Unknown function (DUF4232 family)	2005000	2005800	1863900	3719200	3165900	5538700	4452800	4442000	5586800	5533000	4605700	6426500	1364300	8451800	2009600	1499000	949280	5599900	1076400	5233600	2442600	1611800	1249700	1047900	6361200	7811400	3217900	5700700	4418300	1912300	851650	1623300	1903900	1980500	2912900	1650200	2253900	3019100	8	9	7	9	7	10	9
SLIV_11955	A0A076M6N6	139.21	A	Multifunctional 2-oxoglutarate metabolism enzyme (EC 2.2.1.5)	8990.5	5620.4	2420.5	7735.2	8743.9	24444	13485	21651	24735	36504	0	0	0	15174	39727	18857	23597	48908	0	41939	32121	10026	15522	31421	121990	76014	55193	276970	371680	192140	103550	102150	126520	0	8803.6	10829	0	0	1	1	1	1	1	1	1
SLIV_29175	A0A076M6R9	20.062	E	Secreted Lipoprotein (Sec) - Unknown function	38972	32255	81127	88928	142990	121590	329220	0	0	0	0	0	0	0	67169	36278	0	153930	125790	381030	108120	135470	0	118450	93485	447640	179230	153300	61241	0	0	0	0	0	0	0	408220	524850	1	1	1	1	1	1	1
SLIV_18370	A0A076M6S9	15.909	X	Secreted protein (Sec) - Subtilisin inhibitor (IPR023549)	1776000	1232600	1688100	3401500	3838700	4826800	4114200	7307900	7688800	7721300	3730800	5786200	839750	10687000	4800100	2247900	2002900	8697800	517620	7342500	10684000	5221400	2749300	5050100	19172000	17913000	8175400	20024000	12243000	6255700	4223600	14248000	13063000	1028400	1286800	1397500	3053200	195720	3	3	2	3	3	2	2
SLIV_29275	A0A076M6T0	45.499	X	Secreted protein (TAT) - Uncharacterised conserved protein UCP016719 (IPR008302)	25282	0	0	0	37705	124110	0	395260	156140	1247200	344690	108960	24984	238040	56281	50613	26086	0	0	73936	59115	19235	19536	0	91291	0	0	1041800	610430	164460	0	0	154930	0	0	0	0	0	1	0	0	0	1	1	0
SLIV_18500	A0A076M6W7	68.783	B	Integral membrane protein - Copper resistance protein C (CopC domain (IPR007348))	0	0	0	0	55471	0	0	0	0	0	0	0	0	0	0	0	0	0	56849	0	47528	25135	17693	0	157380	0	0	274340	84649	182650	121110	312990	279630	67424	143820	0	195330	166610	0	0	0	0	1	0	0
SLIV_12365	A0A076M6Z2	38.181	X	Secreted protein (Sec) - Lon protease (IPR027065)	57682	16647	50981	169670	161490	260050	287120	87106	144560	130360	85083	209250	23107	162450	110430	84365	9577.9	234810	208890	375970	231790	169760	75706	173790	233310	184270	186740	1497000	1784700	794690	318500	404500	574510	410050	204280	442640	616210	432800	4	3	3	4	5	3	3
SLIV_26150	A0A076M701	28.236	B	Integral membrane protein of unknwon function	114080	29892	83916	58769	157010	0	171600	451630	647390	697300	720080	822770	306040	474970	203650	48225	0	318630	161970	288930	540650	342540	1273	178900	472530	833590	0	1669900	1423100	757320	516960	3320100	1054500	166140	127300	92643	158090	151960	1	1	1	1	1	0	1
SLIV_30030	A0A076M742	19.159	A	Thioredoxin-like protein	73472	72417	26883	72291	96527	105450	34402	59952	84792	313030	74494	106700	21038	87281	176430	123160	120020	428370	100940	494430	174560	53972	232990	301840	1061700	776760	593660	3475800	2112400	1677300	1152000	1156600	1127600	32519	134010	84828	144020	88631	2	2	1	2	2	1	1
SLIV_26525	A0A076M755	22.339	X	Secreted protein (Sec) - Ferritin-related protein (IPR012347)	677010	1104900	1349300	1267100	1984600	2117900	2616800	2378000	3024000	2679900	2772000	5150900	2114300	3163800	1268600	703750	407410	2366700	1694400	1649700	856150	776050	654520	1063500	4838500	4587500	1076900	623680	606040	268980	138340	198770	257590	148020	730190	159940	203840	191320	4	3	4	4	4	6	5
SLIV_26775	A0A076M778	40.324	B	Integral membrane protein - Colicin V production protein, CvpA (IPR003825)	98631	85096	79152	206720	215310	426840	265220	432790	677610	689510	528750	940490	344160	629930	29239	33052	51712	197700	36896	78830	0	0	35286	93398	81307	141400	74461	0	0	0	0	0	34001	1711100	1018800	187020	1716600	1282700	2	2	2	3	3	5	3
SLIV_30215	A0A076M787	46.367	A	Uncharacterized protein	0	1449	0	0	0	54524	18467	0	0	176070	0	0	0	0	21418	45266	56840	105470	0	145240	167850	65095	76863	117390	296720	193800	73120	826230	1125900	587660	268890	251860	212260	10130	0	0	0	0	0	1	0	0	0	3	3
SLIV_27125	A0A076M7D4	100.79	P	Secreted protein (Sec) - N-acetylmuramoyl-L-alanine amidase domain (IPR002502) with Tachylectin 2 domain (IPR023294)	3077300	2782800	2857800	4310200	5533200	4502100	5241100	6727600	9207800	8236200	5728500	12410000	5020000	11150000	1206900	635130	386810	3491000	2177100	3362000	2211900	1488500	817800	1471500	5905700	8437200	2413800	7271800	3086900	2526900	990790	2731900	3200600	1813400	1258100	1551600	2143400	2196100	25	27	22	29	27	28	29
SLIV_27225	A0A076M7E7	84.171	B	Integral membrane protein - Transglutaminase-like protein	6779.2	2716.2	10343	35978	26203	77480	82209	32526	71380	171990	17878	138720	0	102060	139670	79547	127400	387310	33577	290260	182510	103780	105810	171850	798810	869280	388730	430340	141840	226570	104260	105910	183620	82865	41755	28115	30606	24105	1	1	2	4	3	4	4
SLIV_30645	A0A076M7H2	55.112	A	Amidohydrolase 3-like protein (IPR013108)	6997	5515.1	0	13165	0	0	0	70948	23885	0	17080	28730	0	16189	145260	73337	57815	227540	202690	183950	294720	102210	105010	136340	462620	395180	248070	313950	77921	117190	59593	132640	209260	0	0	0	0	0	1	1	0	1	0	0	0
SLIV_13715	A0A076M7S3	53.022	A	Histidine ammonia-lyase (Histidase) (EC 4.3.1.3)	0	0	0	0	0	0	0	0	0	0	0	0	0	0	0	0	0	0	0	0	62249	0	28349	0	136940	0	0	0	0	0	47636	0	94818	0	0	0	0	0	0	0	0	0	0	0	0
SLIV_20620	A0A076M7Y4	22.005	E	Secreted Lipoprotein (Sec) - Unknown function	16252	0	18201	0	0	0	104260	0	0	22876	0	0	0	0	2612.7	0	0	0	0	0	0	0	0	4056.2	0	0	0	0	24376	6773.9	0	11879	155940	192470	0	135900	252000	0	1	0	1	0	0	0	1
SLIV_14075	A0A076M7Y6	58.086	X	Secreted protein (Sec) - Putative beta-hexosaminidase (IPR015882)	0	0	0	0	0	19276	0	62567	0	0	49372	92153	20174	0	0	0	0	13530	25518	26598	0	0	0	0	74424	89757	0	0	0	19435	5681.2	0	0	0	0	0	0	0	0	0	0	0	0	1	0
SLIV_20235	A0A076M7Y8	43.625	B	Integral membrane protein of unknown function	0	18834	0	15698	0	0	0	945460	1269400	2343800	621280	3896700	0	2293300	152070	39810	0	781660	1480400	0	693490	0	0	830100	1646400	1883800	0	351240	1764900	1401100	1017500	1325300	1255700	1256000	0	174100	1088200	973430	0	1	0	1	0	0	0
SLIV_28415	A0A076M843	31.748	B	Integral membrane protein - Protein with LPXTG cell wall anchor domain (IPR019931)	682610	373580	372390	702130	626650	896880	1177600	982470	1367700	1927800	936860	1868600	465050	1530600	2291700	1751600	1211300	7416000	6214200	7148400	5774700	2839000	2225600	5248300	10434000	12625000	7690800	18020000	12559000	6502500	5282600	7662900	9775900	91945	203640	221650	410050	247730	9	10	9	7	7	8	11
SLIV_14450	A0A076M858	33.735	B	Integral membrane protein - Protein with LPXTG cell wall anchor domain (IPR019931)	53411	33835	58696	0	173700	106260	0	0	0	0	0	0	0	0	162490	105390	72688	190690	172950	213320	250020	383300	39919	103770	390380	478010	194540	456560	0	119120	40734	239780	341330	731800	0	110930	776340	447780	1	1	1	0	1	1	0
SLIV_20750	A0A076M899	77.084	B	Integral membrane protein - ATP-dependent zinc metalloprotease FtsH (EC 3.4.24.-)	29806	31490	37373	67107	63177	69516	59796	48401	55603	63105	72623	130270	74557	123910	29084	9676.7	6226.3	26802	0	31599	0	19962	0	18763	0	0	0	0	0	0	14641	0	0	0	16513	0	0	0	1	1	1	1	1	1	1
SLIV_29075	A0A076M8F0	35.249	B	Secreted cellulose binding protein (Cell wall anchor)	7786.2	1718.4	8212.3	19764	20845	24606	28681	35901	35174	7859.5	32999	59135	18512	38610	21713	11307	0	41021	25303	47323	37082	33244	11131	25751	48526	48640	50488	126190	132590	0	0	0	111030	256670	57675	180130	299280	230160	1	1	1	1	1	1	1
SLIV_14990	A0A076M8F9	40.247	B	Integral membrane protein of unknown function	6494.2	0	6056.9	14633	12489	19649	74328	129150	165520	128120	93207	198170	0	131140	31496	14727	478.12	81578	0	305790	54294	104190	22575	39117	238790	142860	69827	475960	219460	110930	48253	187650	349290	26047	8685.6	16127	0	0	1	0	1	1	1	1	1
SLIV_21780	A0A076M8I9	33.127	A	UTP--glucose-1-phosphate uridylyltransferase (EC 2.7.7.9) (UDP-glucose pyrophosphorylase)	54840	47205	28497	51055	67935	151330	85197	105310	154090	83726	64696	209110	29011	73401	0	47594	88653	15817	24378	174500	55603	17496	12026	16933	683910	87669	384820	1312100	898900	535100	178470	547910	374590	7410.3	0	10218	0	0	1	2	2	2	2	3	2
SLIV_21815	A0A076M8T3	59.627	B	Integral membrane protein of unknown function	117480	140340	125750	190560	196650	254960	305820	599890	380070	254200	356940	799890	81451	625950	102710	56367	72138	133770	173730	321200	236070	137550	129030	70595	118680	602400	157810	1546800	450010	762010	495660	799300	601390	214440	104800	59541	357810	0	3	2	3	3	2	2	3
SLIV_30195	A0A076M8T9	62.29	B	Integral membrane protein - Protein translocase subunit SecD, component of Sec export system	193700	273850	205420	600350	444450	543710	830710	421100	633170	451320	535930	1291700	166800	750580	533910	120160	54854	1145100	781540	996510	904930	615200	270960	521730	1463000	2092200	971020	647980	443470	198200	134890	98082	257310	722710	486290	532480	719810	739190	3	4	3	4	3	4	4
SLIV_22225	A0A076M8U0	51.572	A	Oxidoreductase	0	0	14303	60557	70384	73655	84409	73429	0	0	0	142800	3229.6	0	0	28864	0	72406	0	44611	4484.6	0	0	0	0	0	25264	59899	85030	58172	0	11122	0	416910	169090	357780	407930	316440	0	0	1	1	1	1	1
SLIV_15460	A0A076M8W3	27.635	X	Secreted protein (Sec) - Enodpeptidase, NLPC/P60 domain (IPR000064)	505470	420200	566790	619200	596350	730020	1397800	1462100	764630	2500100	1026300	1554900	529200	1470900	467150	288850	181970	1369600	541500	1056300	594600	15135	0	0	2588700	3289000	977280	5261000	107780	1766300	836650	1813600	2720400	126070	108750	587630	816120	1098200	2	1	2	3	1	2	2
SLIV_22480	A0A076M8Y6	61.136	B	Integral membrane protein containing cell envelope-related transcriptional attenuator domain (IPR004474)	0	0	0	0	0	0	0	0	0	10837	10762	0	0	17066	0	0	0	0	0	0	0	0	0	0	0	0	0	0	0	0	0	2572.6	0	0	0	0	0	0	2	2	2	2	2	1	3
SLIV_30570	A0A076M905	9.9191	A	Phosphoribosyl-ATP pyrophosphatase (PRA-PH) (EC 3.6.1.31)	0	0	0	0	0	163910	88238	0	0	240350	16993	62089	0	224810	125420	148750	77221	371900	14744	462130	517210	227530	222120	287580	1007900	583870	516610	723560	726180	362870	460810	326860	246530	0	99994	0	60468	27109	0	0	0	0	0	2	1
SLIV_15835	A0A076M926	63.092	B	Integral membrane protein - Ser/Thr protein kinase	370170	393290	516700	835210	997500	1325100	1423500	757190	1080600	1299800	745740	921750	280010	1443600	1482400	746270	490580	2713200	889860	2734000	1771400	1333900	712540	1279600	4583700	4365200	2275300	2659300	1510400	875050	432870	891210	1159400	650870	902260	763020	877010	734620	4	4	4	4	3	4	4
SLIV_33280	A0A076M965	34.12	E	Secreted Lipoprotein (Sec) - Unknown function	8295.6	0	0	26625	34042	0	31961	0	0	39988	20324	38741	14175	0	14423	642.29	0	0	0	0	0	0	0	0	0	0	62581	0	0	0	0	18342	0	0	47415	0	49819	50307	1	0	0	2	1	0	1
SLIV_30840	A0A076M974	31.172	B	Integral membrane protein of unknown function DUF881	107290	47241	83406	167620	126720	154980	169270	170730	314700	201610	223320	599190	114630	369500	97461	21208	25395	404710	84668	274760	105200	25744	34227	30656	250720	450430	177340	52826	180820	0	2184.7	0	0	90168	79101	55535	81166	65778	3	1	2	4	2	3	4
SLIV_16235	A0A076M985	90.796	B	Integral membrane protein (1 TM predicted by Phobius) D-alanyl-D-alanine carboxypeptidase	19771	5764.3	7287.3	16101	19742	19540	27179	20414	31404	33474	24442	55745	23625	44689	0	0	0	0	27992	23966	0	0	0	0	15892	0	0	60182	29891	13866	1156	0	2594.5	0	4429.7	0	0	8396.9	2	2	1	2	1	1	1
SLIV_16285	A0A076M993	19.396	X	Secreted protein (Sec) - Uncharacterized protein	0	0	0	0	0	207700	186940	123320	138770	379640	0	0	0	426640	95237	111880	122040	279040	0	0	0	0	0	99367	251340	125430	0	0	0	0	0	0	0	0	92019	0	0	0	0	0	0	0	0	1	1
SLIV_16635	A0A076M9D8	34.29	B	Integral membrane protein - Protein with WD40/YVTN repeat-like domain (IPR015943)	920810	590110	745690	1168700	1447300	1514400	1606500	1648200	2339700	2134200	1810100	3297700	1560700	2749100	628340	318100	72066	1407800	1090800	1406500	627100	513480	230520	445640	1332200	1844800	808240	341520	367910	130640	62679	109130	122340	841790	693880	559960	952710	738190	5	4	3	5	3	4	4
SLIV_23205	A0A076M9J3	86.803	B	Integral membrane protein - Penicillin-binding protein	82211	0	14077	70451	96076	0	117680	171540	51869	47014	156750	272540	114130	241240	78870	39927	0	0	40907	0	57797	0	20193	39367	0	86987	34484	113290	375990	138320	34354	47611	0	7877	36031	0	0	49747	3	1	2	2	1	1	2
SLIV_23460	A0A076M9M0	20.219	E	Secreted Lipoprotein (Sec) - Unknown function	0	0	0	0	0	0	0	0	0	0	0	0	0	0	0	0	60583	162800	0	111230	127770	76485	86011	113290	196650	0	0	1441700	411900	919420	105470	591870	1066100	0	0	0	106830	0	0	0	0	0	0	0	0
SLIV_34110	A0A076M9M2	56.381	B	Integral membrane protein (1 TM predicted by Phobius) Hydrolase	890610	1511600	1166000	1566300	1949900	2303300	1937600	2769000	2977500	3471800	2078100	4733800	1156600	5533300	1742900	376380	216130	2659700	1184800	2855100	1387600	1799100	1392500	752320	4253000	5924000	2352500	2575000	2132700	1467900	659410	1506800	1598700	1768600	1079500	1000300	1293500	911990	5	5	4	6	7	10	10
SLIV_17100	A0A076M9M5	52.596	B	Integral membrane protein - Hydrolytic protein	644930	1031600	675590	849750	1042700	1110000	1124300	1533400	1750500	1400300	1149100	1823100	414020	1853400	715380	619410	499380	1142100	329580	1205400	823870	515780	421130	517190	1333500	1439200	775690	0	163470	109020	13739	181970	170370	65597	1078000	947120	1242700	936640	4	3	2	3	4	4	4
SLIV_31790	A0A076M9R4	34.017	A	Reductase	0	0	0	0	0	0	0	0	0	0	0	0	0	0	282380	114270	101840	726730	340690	473530	481700	202940	171360	0	0	1947600	792760	993860	881940	1757100	576940	860720	830840	432170	184440	414100	323450	363750	0	0	0	0	0	0	0
SLIV_23855	A0A076M9U8	35.378	E	Secreted Lipoprotein (Sec) - Quinoprotein alcohol dehydrogenase-like superfamily protein (IPR011047)	97175	28386	33218	164740	149150	209960	263000	224540	303710	0	102830	302130	0	273190	244780	133790	125740	45603	119490	367590	293390	174520	88773	149690	328420	288860	181270	0	100990	0	24337	0	0	0	0	0	0	37848	2	1	1	2	2	2	2
SLIV_35190	A0A076MA45	28.227	X	Secreted protein (Sec) - CAP domain containing protein (IPR014044)	240100	161120	287920	360080	508450	472060	547480	793320	930240	670020	812900	1353700	1088300	1100700	492730	164790	18662	1124000	1015600	1265600	704910	510120	0	429160	692770	2219300	718230	1105400	491830	226400	122160	580260	676740	968090	356360	597530	1222400	826340	1	1	1	1	1	2	2
SLIV_32570	A0A076MA75	34.752	X	Secreted protein (Sec) - Unknown function	0	0	0	0	0	0	0	0	0	0	0	0	0	0	0	19712	9158	77935	0	86452	0	0	18048	57394	265410	498220	73528	0	0	0	0	0	0	0	0	0	0	0	0	0	0	0	0	0	0
SLIV_17990	A0A076MA84	38.604	A	Phosphoribosylformylglycinamidine cyclo-ligase (EC 6.3.3.1) (AIR synthase) (AIRS) (Phosphoribosyl-aminoimidazole synthetase)	0	0	0	0	0	0	0	0	0	0	0	0	0	0	0	0	9372.9	0	0	0	0	0	0	18162	110510	0	0	1053800	70885	355210	116350	261920	323620	0	0	0	0	0	0	0	0	0	0	0	0
SLIV_24680	A0A076MAB0	139.98	F1	Ribonuclease E/G (IPR004659)	35572	32775	7500.8	62872	35501	52099	52276	71001	158550	134990	151480	108600	45917	185230	18121	6294.5	0	17419	3671.6	0	33937	0	0	20742	0	4760.3	0	0	298040	0	19469	0	6440.2	0	0	0	0	0	1	1	1	2	1	1	1
SLIV_24935	A0A076MAE6	17.708	E	Secreted Lipoprotein (Sec) - Unknown function	221260	357770	276880	622720	663850	1123900	836430	499790	476310	155600	393000	913000	160530	1322300	306690	273310	250520	1829800	342680	977510	135310	79798	112460	215040	2338400	1471400	929650	5260500	3505600	2280100	519120	1423600	2473000	32099	235860	234840	325660	438940	2	3	2	4	3	3	3
SLIV_25160	A0A076MAJ2	35.175	E	Secreted Lipoprotein (Sec) - ABC-transporter metal-binding lipoprotein	4856400	4984800	3290800	5319400	8076600	6222700	6945300	8376400	14021000	14525000	8997800	15286000	6428600	14307000	402840	401590	119120	2033500	766520	998860	713950	318710	168870	673140	1603400	1772900	309870	8295900	8703000	4925900	4473200	3086500	3120400	20870000	15338000	10650000	23174000	16082000	10	10	8	13	12	12	14
SLIV_18505	A0A076MAJ9	46.996	X	Secreted protein (TAT) - Deferrochelatase/peroxidase EfeB	0	0	0	0	0	0	0	0	56228	57108	0	0	0	53556	18217	14750	12003	0	0	0	30518	9494.8	19265	23942	0	135660	47414	0	0	0	0	0	0	21077	0	0	0	0	0	0	0	0	0	0	0
SLIV_25265	A0A076MAM3	45.325	X	Secreted protein (TAT) - Phosphodiester glycosidase (IPR018711)	181120	271540	227950	139210	340000	531660	230790	397910	405040	532670	356810	502000	192180	452980	91269	71763	6850.8	9010.5	60158	0	20555	74624	10183	70196	170520	0	0	0	0	0	0	0	0	0	0	0	0	0	2	5	5	4	4	6	5
SLIV_36175	A0A076MAN3	44.684	E	Secreted Lipoprotein (Sec) - Solute binding lipoprotein	65510	47567	72095	67393	109840	73675	68854	60058	72114	68048	91937	208090	29913	157780	0	0	0	61397	13294	36646	40506	0	25261	39166	95959	134150	0	0	0	43328	0	0	0	124330	0	54872	0	0	2	1	2	1	2	1	1
SLIV_18730	A0A076MAN8	19.906	A	Single-stranded DNA-binding protein (SSB)	27646	832	21077	37273	49069	149520	143240	173030	250330	0	26888	289400	18975	217820	53473	73027	32011	192430	35811	211270	0	0	0	116470	376730	586340	197600	2579700	294070	445390	351740	183470	1124400	1696.8	0	0	0	70365	1	1	1	1	1	2	2
SLIV_18780	A0A076MAP5	17.904	B	Integral membrane protein of unknown function	1353400	683010	939390	2741600	3550900	3085600	2615100	3747300	2801600	1449100	1285800	5031600	314190	5630500	3225900	1076000	371720	6339900	935880	6396000	6049500	3179500	1428700	2523800	12242000	16229000	5359400	22093000	12249000	7147700	4109800	8910200	11398000	5546600	1037300	1645800	3532600	2565800	3	2	3	3	3	3	2
SLIV_25550	A0A076MAR6	98.76	X	Secreted protein (TAT) - Beta-galactosidase	158620	63800	126270	188020	246160	175510	1098400	59565	131350	304890	98939	246830	102690	193850	94603	93428	58230	255360	133390	245620	164610	85409	95750	139410	393500	533570	221380	177190	1093300	504680	10413	1496000	167900	155080	59313	15596	25292	2679300	4	2	3	3	4	2	2
SLIV_18970	A0A076MAS4	21.403	A	DNA-binding protein	0	0	0	0	0	0	0	0	0	0	0	0	0	0	0	0	0	0	0	0	0	0	0	0	0	0	0	110380	240400	0	0	34611	54680	0	0	0	0	0	0	0	0	0	0	0	0
SLIV_33510	A0A076MAS8	14.59	A	Putative thioredoxin-2	76323	45621	77240	111040	143340	206380	255970	116960	286440	300170	220330	357570	234660	237160	58550	28137	5316.3	79869	118430	157160	169090	107650	61899	84808	225090	248050	124300	1474300	1207900	474370	291380	1176800	1737300	214700	148660	12187	32235	30684	2	2	2	2	2	3	3
SLIV_33615	A0A076MAU7	51.013	B	Integral membrane protein - PepSY-associated TM protein (IPR005625)	1261700	1537000	963800	1416600	1693700	1713500	1919300	2608900	3428600	3295400	2224700	4224600	660810	2977500	877520	664070	496890	1378400	733320	1132600	1011400	585330	621630	698560	1946000	2075800	1063100	362940	68239	200120	94970	165870	187310	1693800	2907100	1304700	2122100	1999300	4	4	4	4	4	4	5
SLIV_26155	A0A076MB60	33.724	B	Integral membrane protein - N-acetylmuramoyl-L-alanine amidase	146250	130880	114000	161300	212050	185680	220630	23672	214300	163300	60907	152480	41783	269790	280530	108630	208730	774380	293720	863480	804060	302210	291050	253850	1058100	2261800	570140	151140	57983	0	0	0	0	0	0	0	0	0	4	4	4	4	4	4	4
SLIV_26360	A0A076MBC3	34.976	E	Secreted Lipoprotein (Sec) - Binding-protein-dependent transport	2710800	2441800	2079700	4017200	5862600	7035700	6870600	7254800	12495000	10607000	4169500	8229300	1281100	11368000	1218600	1600000	871740	4259700	975230	3724400	1534700	639940	633400	2424100	7493200	7175900	2781300	6532100	2910400	2062900	703100	1304400	2202900	2141400	1895000	816570	1355800	1503000	11	14	11	16	13	17	17
SLIV_20015	A0A076MBF6	57.786	B	Integral membrane protein - Putative spermidine synthase 2 (EC 2.5.1.16)	52102	37057	27235	22869	70236	1747600	51605	199060	267690	202350	136320	129000	0	102500	11680	19042	13580	52600	30982	35681	67036	0	0	49123	201060	16907	12857	0	0	0	0	0	23600	11765	32974	0	0	11038	2	2	1	2	2	3	2
SLIV_26755	A0A076MBG9	53.238	A	Regulator	0	0	0	0	0	0	0	0	0	0	0	0	0	0	5250.4	8718.3	4698.7	23108	13002	18706	0	0	2794.9	11910	22754	0	7862.5	0	0	0	0	0	0	21916	21293	0	0	12685	0	0	0	0	0	0	0
SLIV_26635	A0A076MBH5	53.657	X	Secreted protein (Sec) - Putative secreted protein of unknown function	83357	43493	30827	28548	92551	85709	113660	94182	387580	361460	342380	782420	245600	482760	77727	111340	59951	259780	75497	207930	421090	216920	103090	143730	399700	511540	179090	2647400	1376600	703660	228590	1705300	1867000	853530	620700	594140	764380	496490	2	2	2	1	3	1	2
SLIV_26805	A0A076MBH9	59.035	F1	Dihydrolipoamide succinyltransferase	106400	63924	55071	92301	133890	219150	203530	342490	291940	228600	76684	346380	68938	497710	242620	162060	81105	308550	137830	365760	289140	141130	213280	180720	520030	344120	414980	146420	751590	160860	405970	687940	1018100	26650	33832	12475	11896	61204	3	3	2	3	3	3	3
SLIV_26685	A0A076MBI5	13.46	A	Arsenate reductase-like protein (IPR006660)	0	25918	12379	45099	30601	205840	199120	401990	363610	680810	167490	108360	39390	793690	138710	230270	32730	177230	8026.4	105050	333300	300320	154400	185990	1009200	823750	477760	340300	438800	481410	197570	0	321100	0	22134	33449	97735	38574	0	1	1	2	1	1	2
SLIV_20190	A0A076MBJ2	75.39	B	Integral membrane protein - Ser/Thr protein kinase	56769	72556	265270	110190	114700	0	147260	360710	404950	223340	314500	592590	157320	611780	328110	220290	232430	462290	185790	629400	538740	324250	311440	401400	791000	728440	537210	1305200	1050800	539680	302980	623850	523520	493880	328590	373070	393040	318400	1	1	2	1	1	0	2
SLIV_26905	A0A076MBJ8	51.24	B	Integral membrane protein of unknwon function	289950	217820	253310	252930	352100	374490	447410	608160	582990	670860	538650	1162200	244850	700900	947050	398810	340220	1653800	786250	1713900	1181800	945400	481880	886420	2325700	2770100	1376900	6836500	6207300	3069800	1411200	4266200	4726900	740660	469680	577320	786090	463230	5	7	7	6	5	7	7
SLIV_26810	A0A076MBL0	51.396	F1	Dihydrolipoyl dehydrogenase (EC 1.8.1.4)	54522	66818	14574	7087.5	101740	9859.8	58214	104270	88760	23383	0	73352	20651	200010	256460	110160	106290	694340	168060	658880	227750	80281	115480	193950	910220	1299200	453040	3195200	1168400	946890	581020	1926000	2278000	17623	76357	135460	37831	162260	1	4	1	1	2	1	3
SLIV_35575	A0A076MBT2	35.402	E	Secreted Lipoprotein (Sec) - Solute-binding lipoprotein	599670	309580	403550	581520	1686900	3671000	3152300	943840	3099900	4103700	1090200	2532000	649090	2217400	0	25659	56633	349480	2210	124430	128200	37586	0	51633	0	134870	45192	971810	398310	479320	471260	201410	169290	7623400	4262300	4608800	3757800	2856200	6	6	6	6	7	11	10
SLIV_27260	A0A076MBT3	54.467	A	UDP-N-acetylmuramoyl-L-alanyl-D-glutamate--2,6-diaminopimelate ligase (EC 6.3.2.-) (EC 6.3.2.13) (Meso-A2pm-adding enzyme) (Meso-diaminopimelate-adding enzyme) (UDP-MurNAc-L-Ala-D-Glu:meso-diaminopimelate ligase) (UDP-MurNAc-tripeptide synthetase) (UDP-N-acetylmuramyl-tripeptide synthetase)	17456	15946	8189.6	19959	21902	29555	28143	40287	44327	66202	11221	0	0	0	28460	25856	23388	45166	0	32107	47310	24529	22179	36008	95476	75930	43975	0	225100	152220	87990	96967	90223	105420	64793	83639	111810	79929	1	1	1	1	1	1	1
SLIV_20730	A0A076MBY3	53.655	P	Secreted protein (Sec) - D-alanyl-D-alanine carboxypeptidase	167160	216260	97460	149560	187220	659080	251370	254660	523510	288220	220310	354450	79865	417820	36049	47936	27754	111640	22204	81920	15033	24934	20173	23938	53547	11998	29706	332060	274790	176480	111610	0	0	394970	60501	159170	50130	196970	6	7	4	6	6	7	5
SLIV_21275	A0A076MC62	63.551	A	Lysine--tRNA ligase (EC 6.1.1.6) (Lysyl-tRNA synthetase)	15949	7358.3	0	7442.6	0	0	0	0	85829	1787500	0	17797	7943.7	0	219900	149790	164000	496640	203720	361620	313540	140490	133920	228130	723050	923380	486260	2442300	1931300	1273300	389620	399730	1430500	0	0	9730.8	27676	11609	2	1	0	1	0	0	0
SLIV_28200	A0A076MCA9	41.712	A	Transport associated protein	21896	29449	15943	33164	0	106760	0	0	0	0	43389	71233	15161	0	10501	0	0	0	0	0	0	0	0	0	0	0	0	0	0	0	0	0	0	0	0	0	0	0	1	1	1	1	0	1	0
SLIV_36430	A0A076MCC8	44.539	X	Secreted protein (Sec) - Uncharacterized protein	12483000	9788900	17123000	29984000	35906000	41660000	42211000	43131000	50547000	60355000	35402000	68600000	27315000	69313000	29305000	19193000	14949000	79474000	34685000	89690000	54264000	24355000	18821000	40379000	103820000	129020000	57845000	264450000	157770000	105970000	50951000	128420000	139120000	78030000	36511000	58606000	89678000	66794000	25	27	23	30	27	30	29
SLIV_21970	A0A076MCG3	62.889	B	Integral membrane protein - Cytochrome cd1-nitrite reductase-like protein	82982	72642	74749	107190	131090	126530	173000	229320	220100	169140	147280	391120	27628	385820	278010	168310	155140	425000	285140	472300	189420	222180	143300	258720	622550	693630	335700	573010	279140	125160	84783	157540	178630	142120	220770	142630	199850	147160	4	3	4	4	4	4	5
SLIV_28375	A0A076MCI8	36.523	A	Aminotransferase class V (IPR000192) (Uncharacterized protein)	0	0	0	0	0	0	2813.9	0	0	0	0	0	0	0	12747	12947	20897	0	0	0	0	9579.8	1643.3	31635	20059	55638	11381	353300	81565	174660	11961	32045	172060	211980	83726	138160	161040	47115	0	0	0	0	0	0	1
SLIV_28875	A0A076MCM0	39.92	A	Alanine dehydrogenase (EC 1.4.1.1)	88153	0	6709	42345	16084	23926	24574	0	3874	0	0	2690.2	0	17282	253680	172130	211870	659020	337270	470920	383930	186650	330630	494590	1723500	1717100	1012700	3745900	2232600	1843900	888170	1626400	2036500	323860	107680	266810	392740	216390	3	0	1	2	2	1	1
SLIV_22465	A0A076MCQ9	59.638	B	Integral membrane protein containing cell envelope-related transcriptional attenuator domain (IPR004474)	27754	33690	25641	24598	45643	49802	66023	69476	78925	79023	6458.8	114470	0	0	47539	0	0	0	44669	36678	0	0	0	0	0	0	0	224010	259950	0	125750	41810	67745	106250	100340	99350	125770	98599	2	1	2	1	2	2	2
SLIV_29515	A0A076MCX7	7.9753	A	Prokaryotic ubiquitin-like protein Pup (Bacterial ubiquitin-like modifier)	80394	0	51453	0	205410	0	230860	266870	391650	1577100	0	738480	127320	0	272540	0	139240	540650	487360	576580	437500	0	143060	0	881940	1100800	524690	14919000	9687100	5218500	6231400	4371400	5239900	623630	435770	403240	0	571040	1	0	1	0	1	0	1
SLIV_22930	A0A076MD01	29.121	B	Integral membrane protein with Putative zinc-finger (IPR027383)	13879	36287	38827	31636	781660	1393100	1638200	0	0	0	62166	0	62941	64127	28511	14961	14053	0	68519	66863	90206	0	30107	26784	113430	0	41825	533680	40373	0	0	0	0	0	0	0	0	0	2	2	1	1	2	1	1
SLIV_29520	A0A076MD52	30.086	A	Proteasome subunit beta (EC 3.4.25.1) (20S proteasome beta subunit) (Proteasome core protein PrcB)	0	0	0	0	0	0	0	0	0	0	0	0	0	0	48757	68139	0	252860	149000	186840	121840	50921	13260	44100	271610	211450	183400	311930	0	0	0	0	142790	0	0	0	0	0	0	0	0	0	0	0	0
SLIV_23285	A0A076MDA8	14.736	A	Protein containing Roadblock/LAMTOR2 domain (IPR004942)	0	0	0	0	0	0	0	0	0	0	0	0	0	0	0	0	12628	20801	0	0	0	0	0	10614	49558	0	24649	268240	266460	131080	50458	0	55853	0	0	0	0	0	0	0	0	0	0	0	0
SLIV_29970	A0A076MDE3	50.617	B	Integral membrane protein - Serine/threonine-protein kinase	113690	149340	125170	149570	231480	191060	128700	236890	398430	279840	322760	358380	184930	459960	0	0	0	290440	39457	268680	0	0	0	96391	268470	384780	182090	292040	0	0	0	0	113910	265430	150170	0	0	251990	1	1	1	1	1	1	1
SLIV_30805	A0A076MDS7	57.271	F1	Phosphoenolpyruvate-protein phosphotransferase (EC 2.7.3.9) (Phosphotransferase system, enzyme I)	3012.8	842.15	1443.7	441.94	0	1785	1268.6	0	9994.4	0	0	0	6592	10687	9435.1	6955.4	2792.3	0	5575.4	5469.6	0	4671	10370	0	62831	11156	0	407540	191820	160540	69923	123900	125280	0	0	0	0	0	1	1	1	1	0	1	1
SLIV_24320	A0A076MDV9	15.671	A	Globin	0	0	0	0	0	51434	35633	0	0	209760	0	0	0	0	0	0	42755	131830	0	90691	0	0	0	58881	365680	178850	133360	0	0	0	0	0	0	0	0	0	0	0	0	0	0	0	0	1	1
SLIV_24500	A0A076MDZ2	94.819	F1	Aminopeptidase N (EC 3.4.11.2)	938.8	1066.4	0	6899.6	2380.5	5412.6	6844.6	17817	12528	38414	9552.3	16966	10921	35620	66380	12482	6484.6	62021	29058	70365	64798	36629	18588	36812	106740	270430	78830	855450	505030	171310	80204	175660	474700	17204	10595	21642	15157	14618	1	3	0	2	1	1	2
SLIV_31195	A0A076ME39	36.034	B	Integral membrane protein of unknown function	145910	98056	116190	135510	188940	160730	206050	259450	658900	744080	433990	450710	119760	410060	125780	89749	50607	157980	267530	0	182660	155850	73813	61716	435490	1230900	71844	0	104730	0	0	0	0	5725.4	0	0	0	0	4	4	3	3	4	2	3
SLIV_31200	A0A076ME79	33.355	B	Integral membrane protein - Protein of unknown function	95337	129740	65078	159760	178260	123860	147580	182370	257330	248180	110840	247170	0	274760	169750	96735	65333	308490	39246	257710	276800	171650	167170	166160	544790	734410	253070	329630	114460	105780	78579	85512	138350	249850	286700	151960	229730	208410	1	1	1	1	1	1	1
SLIV_25835	A0A076MEZ3	22.364	A	Uncharacterized protein	2063200	1350100	1777200	2749000	3707900	5550300	5201000	6327200	8354500	8559800	3371400	11160000	1057000	9800100	3690100	1924000	1495000	5151000	354310	5131900	7555400	4008500	2930800	3907500	11582000	11978000	5416500	8713000	5181700	2890500	1640900	2893000	3701300	483190	853000	467910	841690	367190	2	3	2	2	2	4	4
SLIV_25990	A0A076MF14	14.023	A	Putative prosphopeptide binding protein	0	0	0	0	0	0	0	71412	117570	475530	318320	125120	189920	272070	17192	82290	137770	784760	245600	218550	859790	440680	231720	432030	1614900	405420	915420	6662300	4505200	1717100	1259900	3930200	4813300	290820	194690	164460	421760	232950	0	0	0	0	0	0	0
SLIV_26340	A0A076MF68	44.521	X	Secreted protein (TAT) - Dyp-type peroxidase (IPR006314)	232920	242280	294830	498340	766300	496780	528120	266520	624140	425310	186810	369840	149120	466040	351280	219110	144360	1138400	297790	1041200	640200	107410	197350	517200	1728900	3056500	578600	1601100	465250	337170	315920	387110	767030	430030	340180	718230	996680	772310	5	6	6	6	6	6	6
SLIV_27590	A0A076MFW2	32.636	X	Secreted protein (Sec) - Chitosanase (EC 3.2.1.132)	642710	520270	673930	1102200	1067700	1599300	1492600	1423300	1380400	2497500	679860	1470900	302250	1956200	841160	970480	681250	2245200	800610	2587000	2625800	1555900	1332000	1394700	3186700	5638900	2612600	2809100	1463700	798600	417030	686650	1211400	1515700	773970	1517700	2297800	1237300	4	3	3	5	4	5	5
SLIV_34870	A0A076MFY8	15.85	X	Secreted protein (Sec) - Unknown function	746650	684100	906250	1203100	1098200	1732800	1905700	1678100	1282800	2475600	1343100	2004500	125240	2592900	2393100	250790	172510	4439900	511430	1257100	3926000	1823300	275150	602550	7642600	7355100	795500	9798200	6194700	3832200	1542000	4496100	4608700	3244800	1651200	800930	3770500	1632600	2	3	3	3	3	2	3
SLIV_28690	A0A076MGH0	94.855	B	Integral membrane protein - ABC transporter ATP-binding protein	0	0	0	30187	33999	0	43009	79491	126830	151980	0	35334	0	166380	56634	27315	24465	77214	0	61061	92930	58350	46695	49891	0	269030	86463	327010	275000	190950	139710	177830	157720	38935	45495	0	0	0	0	0	0	1	1	0	1
SLIV_29725	A0A076MGW5	24.167	F1	Translation initiation factor IF-3	967730	1050200	636870	622320	949550	1492300	1401600	256420	1862400	2790000	1772200	0	630330	1642800	1864400	1590200	1508500	2970100	1715700	2919500	4058200	2535700	1730600	1900900	7565900	4587000	4106900	7036200	10294000	4931300	4138000	4069500	3457600	757470	822060	1102800	1356500	700790	2	2	2	2	2	3	2
SLIV_29900	A0A076MH05	42.791	X	Secreted protein (TAT) - Glycerophosphoryl diester phosphodiesterase	0	0	0	0	0	0	0	0	0	0	0	0	0	0	0	0	8734.6	0	0	0	28054	0	7770.4	14188	0	66177	0	266140	187870	84632	24787	47789	116870	0	0	0	0	0	0	0	0	0	0	0	0
SLIV_30855	A0A076MHI2	28.15	A	Forkhead-associated (FHA) domain (IPR000253) containing protein	0	0	104550	137110	121080	304580	0	357040	695680	462740	461770	1283500	270780	495460	655990	230230	212900	454630	293890	766750	1333600	389910	541150	300430	1830000	1999900	1086700	4256100	2991000	2326300	1134800	2794000	2549300	0	164760	273180	359340	159550	0	0	1	1	1	1	0
SLIV_31935	A0A076MHZ5	44.608	N	Transcriptional regulator	321870	334470	0	756520	3303600	2211500	2932500	11159000	4667800	214100000	319770	3036400	0	66091	1858800	965120	592910	0	0	0	0	0	0	0	0	0	0	10274000	2647300	1842000	0	3841600	5679900	0	0	0	0	3285800	1	1	0	1	1	1	1
SLIV_32110	A0A076MI21	34.491	B	Integral membrane protein - Bordetella uptake gene-like protein (IPR005064)	90468	19097	21427	197900	165530	270200	372390	173490	205090	169110	77839	316100	0	283630	312800	126800	141430	603160	172410	403670	259470	188560	131370	218030	1098100	442350	521910	41619	0	112250	0	0	0	101830	109630	173510	0	53336	2	1	1	2	2	2	3
SLIV_33070	A0A076MIL8	47.033	X	Secreted protein (Sec) - Transglycosylase-like protein	18087	25525	20172	28316	35920	0	0	38947	60731	0	43741	101880	17802	0	55012	0	0	180120	59549	0	0	55711	50024	78030	0	286380	99080	0	0	0	0	0	0	0	49856	0	0	65607	1	1	1	1	1	0	0
SLIV_35895	A0A076MKC1	16.144	X	Secreted protein (Sec) - Spore-associated protein A	1507400	1385300	1582600	2407500	2366100	3702600	3633500	4396600	6696500	5184900	4754400	6876900	2207800	7983000	4928500	2570600	2779900	7954700	2901800	8595600	8162600	3900300	3966800	4875100	13189000	15469000	8722500	97017000	81253000	61470000	26887000	61703000	28940000	11196000	5396800	10851000	14151000	6542600	5	5	4	5	5	5	6
SLIV_36670	A0A076MKT2	35.498	A	Sporulation-control protein	53560	28351	37058	39549	0	29981	0	78068	0	0	52450	124090	0	84875	73439	40223	20913	469170	176380	292020	95493	24010	62209	307870	1680200	622620	328650	12529000	4415200	3326100	1149900	3591900	5370300	129960	95118	13654	183250	74084	2	1	1	2	0	1	0
SLIV_37195	A0A076ML10	36.438	X	Secreted protein (Sec) - Protein containing Alpha/Beta hydrolase fold (IPR029058)	61827	65353	40284	170850	77755	406830	545940	368250	359170	1242600	71051	57224	19958	1326500	395350	373800	260790	906920	85672	865650	688460	368860	371890	394840	2162600	2824600	922460	2482400	767890	885920	351690	571620	1196200	269380	452420	261570	265460	391090	2	3	1	3	2	3	6
SLIV_03205	D6EC14	37.315	E	Secreted protein (Sec) - Iron transport lipoprotein - ABC transporter family (IPR002491)	0	8416.2	0	0	37600	0	88133	98243	89333	297850	0	7395.5	0	197920	82703	51922	74724	187250	0	206590	149750	61407	87746	144890	471550	713370	227120	1038700	659310	527540	212300	266420	339850	10300	6720.5	0	0	12335	0	1	0	0	2	0	2
SLIV_03490	D6EC72	15.069	X	Secreted protein (Sec) - Cupin 2 family	402130	398440	447190	652530	757280	648630	903870	1757300	2132800	2271400	0	1448200	0	3157800	439840	192180	84389	1267300	80868	1235000	683680	456110	216140	333090	1433200	2306800	760900	0	0	0	0	0	0	5069700	2732600	4199400	4974300	3601000	1	1	1	1	1	1	1
SLIV_13770	D6ECF3	62.499	A	Acetyl-/propionyl-coenzyme A carboxylase alpha chain (EC 6.3.4.14)	37641	44084	43126	55543	57413	63381	53029	85402	60051	0	99210	209140	69960	94726	12425	15339	5984.1	84404	73747	37499	75815	24589	39730	26385	77790	70860	26748	502090	284310	313500	194960	297680	257750	51122	0	0	0	35717	1	1	1	1	1	1	1
SLIV_13820	D6ECG3	72.756	A	Putative protein kinase (Uncharacterized protein)	100730	54464	113770	210520	238870	241890	288410	192980	231200	334160	254480	480620	132340	232730	228420	94910	9978.1	781210	532400	1012600	531680	349350	172710	351060	1115900	2168400	633700	502440	414940	92240	49770	154060	290510	616680	194130	485080	926970	901910	4	3	3	5	4	3	3
SLIV_13850	D6ECG9	20.758	E	Secreted Lipoprotein (Sec) - Unknown function	334910	256810	399080	537410	993440	838800	684540	929690	804500	671930	691720	1135400	710960	782390	852400	271330	50328	1158700	773690	2381900	962040	759770	404180	729490	1909700	4465200	1548700	3225800	1478900	597070	443030	1400500	1396000	1275600	705060	623010	691770	440740	6	5	5	5	5	5	5
SLIV_13865	D6ECH2	11.892	X	Secreted protein (Sec) - Unknown function	211230	190050	35084	215530	243250	502980	389520	938210	576920	0	0	176250	0	0	1249000	1488300	1226000	1867200	307750	1387900	1676700	828600	724230	1167300	2951200	1551000	1736600	1351000	1420400	821160	854850	530090	0	229050	195670	210320	423890	249580	1	1	1	1	1	1	1
SLIV_13950	D6ECI8	36.071	E	Secreted Lipoprotein (Sec) - ABC transporter substrate-binding protein PnrA-like (IPR003760)	0	0	9448.7	9542.3	16220	0	18282	0	34514	0	0	0	0	0	8573.5	0	0	36005	45875	40360	0	13283	3196.9	0	35124	74987	0	44703	22166	17915	5075.7	33537	42169	0	0	23431	0	0	0	0	1	1	1	0	2
SLIV_14185	D6ECN5	51.434	F1	Serine hydroxymethyltransferase (SHMT) (Serine methylase) (EC 2.1.2.1)	30498	26416	19894	34396	38917	48878	35795	43360	63555	33902	36735	78417	28121	63663	163510	73021	67638	327810	209560	177970	232680	69425	108540	186260	605010	730020	286950	2742400	1524300	1145400	492000	1115400	1733400	150140	41237	162850	234270	135550	5	3	4	3	3	3	3
SLIV_14210	D6ECP1	36.196	E	Secreted Lipoprotein (Sec) - Glycine betaine-binding lipoprotein	0	0	0	0	0	0	0	0	9983	0	0	0	0	0	14221	8952.6	0	38434	0	0	0	28427	15346	64237	296310	492260	70325	337710	46090	72896	0	126560	94966	0	21655	0	0	0	0	0	0	0	0	0	0
SLIV_14225	D6ECP4	55.945	A	Oxidoreductase	15944	12826	14186	23410	27184	35556	26820	0	41242	18943	49272	15639	35352	0	80948	48110	49003	177440	112940	150250	98355	39428	70511	125300	472110	525770	201650	885460	616120	392080	205990	394020	579190	22995	17700	31844	0	50300	1	1	1	1	1	2	2
SLIV_14235	D6ECP6	34.643	F1	Malate dehydrogenase (EC 1.1.1.37)	347760	261510	188400	1003700	889870	2041000	1601500	2616300	2061700	1901500	275770	1659100	199010	2113500	3865800	1354600	1056800	7928900	1734900	6292100	6878400	2477500	1897700	4815900	14525000	15188000	7105000	73570000	33280000	24252000	10154000	26677000	40577000	1929500	1657800	2505700	3346300	1291200	9	7	7	9	7	10	9
SLIV_14250	D6ECP9	29.79	A	Bifunctional protein FolD	42235	85758	17545	68562	38998	100340	78025	261460	140910	117900	17435	108460	165320	25700	491650	142870	140770	980510	90747	535810	936780	239100	353480	539410	2653000	2171900	1005400	9771800	6284100	3800300	2229900	3958400	4755100	105300	21940	182130	116980	77065	4	4	2	5	2	3	4
SLIV_14270	D6ECQ3	16.503	X	Secreted protein (Sec) - Unknown function	0	3164.7	0	0	0	0	0	0	0	0	0	0	64438	0	0	0	13539	0	7282.9	0	0	0	0	96895	0	0	0	634680	556100	178610	0	0	0	0	0	0	0	0	0	1	0	0	0	0	0
SLIV_14280	D6ECQ5	49.042	B	Integral membrane protein - Ser/Thr kinase containing peptidoglycan binding-like domain	2605.8	23941	14919	35567	32737	0	4335900	2999700	4057100	4237400	677860	876290	44137	4755400	78579	48755	0	108830	65971	0	0	53691	54400	63329	169060	414040	107230	566400	0	108290	79919	172570	3959700	0	0	29526	36737	19530000	1	1	1	1	1	0	1
SLIV_14295	D6ECQ8	55.124	A	Bifunctional purine biosynthesis protein PurH	52726	0	6169.1	0	8995.7	9882.1	12107	82026	106850	74766	0	9815.8	0	27461	244140	91684	86451	466040	94111	242160	392650	104660	145280	186890	1151500	846380	576940	4546700	2681400	1456800	751830	1614900	2093200	0	26183	52771	89064	29264	3	0	1	0	1	2	1
SLIV_14320	D6ECR4	30.238	F1	Succinyl-CoA ligase [ADP-forming] subunit alpha (EC 6.2.1.5)	240070	361260	129730	350470	240140	297930	467530	1456000	1390900	1180800	566570	1493700	136850	1609700	1053300	663130	740760	2930500	665810	1581000	2077300	661900	1355800	1923400	9262500	8265500	3387300	23348000	11362000	8981100	2396900	6424100	9242400	1252500	748600	1046500	1315200	899130	7	5	5	6	4	3	7
SLIV_14325	D6ECR5	41.602	F1	Succinyl-CoA ligase [ADP-forming] subunit beta (EC 6.2.1.5) (Succinyl-CoA synthetase subunit beta)	841880	643930	406280	785680	958760	1417200	1290900	1553200	1410300	1856000	706460	1323500	234260	1152400	2203500	1021400	1029800	5131900	1440700	3729700	4320300	1694400	1615100	2725600	12291000	11834000	5489800	20429000	10634000	9157200	4355000	7806700	9969500	1518500	919530	1218100	1691500	1285700	7	9	8	7	8	12	13
SLIV_14330	D6ECR6	31.462	X	Secreted protein (TAT) - Unknown function	29557	8771.8	19306	63768	34912	38467	48355	46143	72388	0	53361	96339	53490	63696	29121	9106.8	4971.5	33141	56574	0	0	13664	6077.8	18546	50490	0	0	0	0	0	29004	0	0	0	0	0	16793	0	1	1	1	1	1	1	1
SLIV_14380	D6ECS6	42.947	X	Secreted protein (Sec) - Enodpeptidase, NLPC/P60 domain (IPR000064)	721760	799050	413700	903780	1161400	1469500	1416200	1271500	1876100	3028300	358950	543070	11414	2279100	397030	609930	402630	1171400	164620	947330	784740	350390	222500	486660	1140800	1156700	704140	1736800	2040800	966790	520130	264150	600810	1300900	830740	516830	1006700	843460	5	6	5	4	5	6	6
SLIV_24460	D6ECV7	94.422	A	Aminopeptidase N (EC 3.4.11.2)	112280	46330	51575	154500	161600	289750	221360	290340	222990	226140	92707	309350	259500	297710	671480	234880	189340	1191400	622600	1064200	1285700	488370	366180	749690	2746600	3052700	1341000	11019000	5852000	3893400	1466000	3945000	4782500	542490	121060	312780	445620	281520	5	5	6	6	5	7	8
SLIV_24490	D6ECW3	114.36	X	Secreted protein (Sec) - Peptidase S8, subtilisin-related	214520	192910	172390	253310	412740	302460	306800	568630	692320	776750	281950	649260	99783	658520	19496	8441.4	1673.5	0	0	20303	32111	10136	4210.3	6117.9	70033	76746	7803.9	0	0	0	0	0	0	14227	9999.8	3334.9	49856	41846	6	5	5	5	6	6	4
SLIV_24510	D6ECW7	23.527	A	Superoxide dismutase (EC 1.15.1.1)	81883	67717	63914	70036	74410	177900	150440	104020	186900	0	99047	205950	63967	254030	570590	295730	229540	1050800	1111800	616770	745210	269950	355300	527900	2359700	3415800	1048900	10603000	5909700	4730400	1808400	3128200	4646100	74302	72995	136580	106710	91393	2	2	2	2	2	2	2
SLIV_24575	D6ECX8	51.167	F1	Trigger factor (TF) (EC 5.2.1.8) (PPIase)	690390	304310	377390	649800	948820	1050000	1059600	1388300	2502100	2089800	1767400	3222500	841710	1465200	1409500	513860	239040	2484700	1812300	2381900	1668600	844970	413450	887460	2754600	3200700	1793400	5894200	4465400	2458600	1138700	3059400	3163300	2834000	1109300	1812600	3334600	1950900	9	8	8	7	8	8	8
SLIV_24595	D6ECY2	35.274	B	Integral membrane protein of unknown function	2409200	2198500	2690700	4212500	3205600	4194800	4657200	4413000	6966500	7498200	8117600	11360000	4618800	8010600	3360400	1882300	560880	8689600	5189800	5208300	6235600	3497800	3195600	4809600	13204000	19359000	7994100	28865000	11584000	6359500	6522600	17130000	14420000	2642200	4567300	2851400	4871700	4355600	8	6	7	6	5	7	7
SLIV_24615	D6ECY6	15.11	F1	Nucleoside diphosphate kinase (NDK) (NDP kinase) (EC 2.7.4.6) (Nucleoside-2-P kinase)	212700	167170	83410	247210	221540	420380	458630	306110	414590	1397700	152780	506570	0	283840	1048600	595700	603750	1315900	141680	1166500	2409500	741520	863220	1043700	7643900	4535400	2213500	15419000	10470000	5832800	4589900	2205000	3216200	205510	140610	243810	110890	172230	4	2	4	7	4	4	5
SLIV_24625	D6ECY8	35.727	X	Secreted protein (Sec) - Cell shape-determining protein MreC (Cell shape protein MreC)	12202	11963	10289	25384	39834	38046	67303	209310	87701	115580	113610	925020	66103	151690	20233	14156	9719.6	227400	135970	182880	21894	22280	11362	28321	433000	407860	92021	0	115510	0	0	0	0	12247	17404	0	0	0	2	2	1	2	2	2	3
SLIV_24635	D6ECZ0	83.454	B	Integral membrane protein - Penicillin-binding protein 2 (IPR017790)	128890	119440	138940	157300	223690	164570	229320	275510	226140	326800	208670	371030	98340	161410	279980	161030	105890	458630	201230	572470	332240	204260	123310	178830	750470	1068000	397680	880610	776200	619110	42913	575340	666230	74054	49679	46889	58120	40035	9	9	9	9	9	7	8
SLIV_24705	D6ED07	67.501	A	Exopolysaccharide phosphotransferase (EC 2.7.-.-)	54927	32786	38706	38802	73484	60643	62561	0	136860	0	110120	174010	35774	121640	57480	29351	19867	73663	41528	63488	81400	54915	31410	56351	129830	145160	77138	0	258590	131310	147770	145490	111320	175390	60865	83494	139600	122630	1	1	1	1	1	1	1
SLIV_24720	D6ED10	61.527	X	Secreted protein (Sec) - Subtilisin-family peptidase	5588600	6734800	4343500	6067800	9194800	13840000	14904000	13961000	14549000	16017000	2130300	15526000	1274700	18258000	3724500	4664900	3450900	7854000	1178600	8777000	2958500	2321200	1686700	3246800	6167400	4623000	2340100	3797500	3970500	2567800	1574900	842480	982310	12696000	6367200	8184900	11178000	7566800	19	17	16	19	17	20	23
SLIV_24785	D6ED24	62.287	B	Integral membrane protein - Membrane protein containing putative LytR/CpsA/Psr regulator domain	86372	78735	75074	123630	63677	126780	181960	0	35860	63124	0	0	0	32034	105580	83416	82478	206470	129190	83987	268870	142830	110730	111680	171770	365750	220930	1163000	1019600	552510	167810	828690	722550	279090	122150	0	210130	142900	3	3	3	3	1	2	3
SLIV_24830	D6ED31	107.13	A	Leucine--tRNA ligase (EC 6.1.1.4) (Leucyl-tRNA synthetase)	4057.1	0	0	0	0	0	0	0	7041.2	0	0	5253.6	3629	5939.1	33010	16354	12680	64262	32379	37560	60301	9109.9	26087	38293	156250	165350	62275	182830	160450	125410	53469	108600	152680	0	3351.2	6458.3	0	0	1	0	0	0	0	0	0
SLIV_24870	D6ED40	9.542	r	30S ribosomal protein S20	2130100	1930700	1569200	1860100	3752600	3561100	4813900	4518300	6895300	969730	2768900	9224900	289320	833550	1383500	628390	399640	1602400	913440	993670	155870	657650	220300	937770	3670500	304190	950910	1671800	2238200	1724500	341410	0	0	877050	270330	1859900	3046300	1952500	2	2	2	2	2	1	2
SLIV_34720	D6ED77	73.209	B	Integral membrane protein of unknown function DUF1996	7622.3	7552.6	2761.3	18811	19630	19172	23999	33635	49533	77773	0	0	0	64086	21653	17246	50190	58022	0	32119	39196	29507	24618	34070	68696	61258	77001	978190	314020	515050	526820	530580	454490	328210	233920	334420	463620	193390	1	1	1	1	1	1	1
SLIV_34725	D6ED78	25.139	X	Secreted protein (Sec) - Cellulose binding protein	0	0	0	0	0	0	0	0	0	0	0	0	0	0	0	0	0	0	0	0	0	0	0	0	0	0	0	908400	523340	392730	27068	437510	477700	0	0	0	0	0	0	0	0	0	0	0	0
SLIV_34735	D6ED80	20.18	A	TerD-like protein	323120	104690	160440	322710	343450	560760	600620	741590	677560	1264100	444950	1342900	232290	833300	1535500	494040	310650	3134800	2621900	2977400	2619600	1253200	838220	1355300	6787200	11646000	4829000	30420000	17242000	9883100	5439800	20482000	23174000	774010	444130	827870	1073200	1088600	3	2	4	3	2	4	5
SLIV_34750	D6ED83	22.256	E	Secreted Lipoprotein (Sec) - Putative cell adhesion molecule - (FAS1 domain - IPR000782)	34560	0	45697	83219	0	0	0	0	0	0	0	0	49905	0	0	39321	0	0	40789	0	0	137160	0	0	0	65773	0	2525400	1352800	724980	477410	1784000	1941700	0	0	181250	0	116180	1	0	1	1	0	0	0
SLIV_34825	D6ED97	36.686	X	Secreted protein (TAT) - Glycosyl hydrolase, five-bladed beta-propellor domain (IPR023296)	12377	15440	0	52571	53522	49275	23596	0	0	64290	0	0	0	0	20259	14308	21251	61900	0	119500	60118	26512	21688	77098	336960	442550	66535	457640	78679	0	91768	206380	210700	39047	0	34336	62668	38512	1	1	0	2	2	2	1
SLIV_34965	D6EDC4	20.096	A	DpsA	12951	0	11927	0	0	0	0	0	0	0	0	0	0	0	0	0	0	136450	0	73526	0	0	11889	0	208000	198420	79770	403350	0	102170	67907	134090	230650	0	0	0	0	0	1	0	1	0	0	0	0
SLIV_04170	D6EDQ1	150.02	X	Secreted protein (Sec) - Glycosyl hydrolase	2030.4	0	3840.1	3472.5	5482.5	4980.4	17106	4539.9	5702.1	5881.5	6978.3	0	0	0	90750	85859	65915	102200	16304	222880	7425.7	134310	70004	55647	184780	171370	93836	19103	7154.1	10593	19640	7783.2	19576	135550	91006	58480	117050	86274	1	0	2	1	1	1	1
SLIV_04245	D6EDR8	79.533	A	Isocitrate dehydrogenase [NADP] (EC 1.1.1.42)	88427	60496	39720	82588	74530	110540	74419	248200	225000	346920	38913	246360	65382	226500	268520	125690	120000	896570	325200	539620	725990	125340	284610	604700	2809000	3189100	1041700	13362000	5775300	4985400	1660200	3027000	5033100	54557	23760	124520	92250	54178	8	10	6	10	10	7	6
SLIV_14395	D6EDW5	37.023	X	Secreted protein (Sec) - Enodpeptidase, NLPC/P60 domain (IPR000064)	26216	0	0	0	0	0	0	115260	218350	345190	369900	666320	288240	50897	219720	89277	0	491130	630510	424330	94272	57082	69779	206130	503780	557550	204070	548900	581840	157910	60103	226310	256090	1410700	484140	919440	1435300	1100400	1	0	0	0	0	0	0
SLIV_14505	D6EDY9	40.115	A	Putative oxidoreductase (EC 1.-.-.-)	5420.9	14654	3066.5	12211	20104	2388.1	51375	0	86287	53983	36659	79799	36235	67089	106000	119120	60737	425780	78626	245420	140240	135720	126200	181880	864040	764390	336150	1685000	604050	796060	271910	395280	1207000	88032	21335	47957	49493	25379	1	2	1	1	2	1	4
SLIV_14510	D6EDZ0	52.475	F1	Inosine-5'-monophosphate dehydrogenase (IMP dehydrogenase) (IMPD) (IMPDH) (EC 1.1.1.205)	0	0	0	0	0	0	0	0	0	0	0	8372.9	0	12989	0	6919.3	5408.6	0	0	0	0	0	0	5558.9	0	0	0	112740	0	73322	48064	0	0	0	32775	0	0	0	0	0	0	0	0	0	0
SLIV_14550	D6EDZ8	57.118	F1	60 kDa chaperonin 1 (GroEL protein) (Protein Cpn60)	39254	46120	6972.4	69163	45701	66185	63982	157730	262930	139970	23216	127780	3999.2	204220	156980	59849	64823	148380	93217	121080	123700	54819	53622	67864	247170	241910	310190	673480	524910	760430	153450	122880	361180	0	60991	16630	13486	42291	4	3	2	5	4	4	4
SLIV_14555	D6EDZ9	10.946	F1	10 kDa chaperonin (GroES protein) (Protein Cpn10)	4177600	3285800	2144900	3235900	3355900	3688300	3505600	5474100	8999100	5049800	4913800	9575400	2034200	6320100	9406900	4459700	3266800	11178000	4459300	7199400	7534800	5147000	4688200	5456500	17847000	21168000	11131000	18061000	11014000	11016000	4471200	7393700	8391500	1589800	3060400	1494100	1593700	1747200	3	3	3	3	3	4	4
SLIV_14680	D6EE25	46.895	A	Phosphoglucosamine mutase (EC 5.4.2.10)	0	0	0	0	0	0	0	0	0	0	6370.5	0	0	34196	0	0	0	0	0	0	0	0	0	0	0	0	0	293280	534890	198020	128380	194200	208860	0	0	0	0	0	0	0	0	0	0	0	0
SLIV_14685	D6EE26	18.699	r	30S ribosomal protein S9	193900	68227	56150	70581	109020	132020	180000	520770	684840	276810	221070	953870	99307	208370	0	0	0	0	0	0	41719	0	0	0	0	0	0	238870	0	81218	24366	107930	0	0	0	0	0	0	1	1	1	1	1	1	1
SLIV_14715	D6EE32	36.695	F1	DNA-directed RNA polymerase subunit alpha (RNAP subunit alpha) (EC 2.7.7.6) (RNA polymerase subunit alpha) (Transcriptase subunit alpha)	30750	34104	28393	83172	81306	59510	89867	131110	118970	101860	42934	63817	0	212940	70075	65316	28274	181260	39926	129370	221450	52085	48857	60207	542930	613020	348200	1417300	1166200	852210	1126500	953330	957850	68350	10114	62807	65504	27472	1	1	1	3	3	1	2
SLIV_14740	D6EE37	29.646	F1	Methionine aminopeptidase (MAP) (MetAP) (EC 3.4.11.18) (Peptidase M)	0	0	0	0	55274	0	25549	33594	38107	0	0	140580	16869	0	0	0	0	0	55143	0	115730	55932	4897.4	0	0	0	72719	0	153430	0	0	0	0	0	0	0	0	0	0	0	0	0	1	0	1
SLIV_14745	D6EE38	23.963	F1	Adenylate kinase (AK) (EC 2.7.4.3) (ATP-AMP transphosphorylase) (ATP:AMP phosphotransferase) (Adenylate monophosphate kinase)	732210	512160	629700	1039100	1016300	1906800	1885900	1345000	1935600	2909300	1730600	2599700	637290	2823600	2223900	1146700	969410	5337500	2298800	4443100	4321900	2129300	1530700	2647200	10217000	9205600	4928800	28971000	13821000	9460000	5281800	12646000	14560000	101350	301190	140790	264510	153270	6	6	4	7	6	8	7
SLIV_14765	D6EE42	20.499	r	30S ribosomal protein S5	0	9437.6	0	10185	19079	57565	47153	131890	0	0	0	0	0	0	36009	0	0	0	0	0	0	0	0	0	0	0	0	0	0	0	0	0	0	119550	46994	0	0	0	0	1	0	1	1	1	1
SLIV_14805	D6EE50	10.72	r	30S ribosomal protein S17	92548	6876.2	38391	71076	87449	131450	157390	307330	415940	164820	136180	614230	161690	241260	131000	32208	0	0	118580	0	146100	104770	43522	82253	146400	0	148680	0	0	0	0	0	0	0	0	0	0	44921	1	1	1	1	1	1	1
SLIV_14855	D6EE60	11.521	r	30S ribosomal protein S10	128550	130140	53972	74471	97917	134410	283720	387320	119300	0	76781	247400	0	124740	0	80451	60665	139870	0	75322	0	0	36367	77237	256080	101530	121950	0	223440	73891	46801	35869	46512	131900	73585	122180	0	0	1	1	1	1	1	1	2
SLIV_14960	D6EE81	33.196	A	Uncharacterized protein	41208	64441	38513	87704	78042	95321	84823	0	117620	113100	11151	12952	34418	91264	0	48298	32632	147670	116850	43553	0	66369	83318	128580	219390	203080	171990	190630	577060	179870	130030	149790	225800	46969	12892	0	12324	0	1	3	3	4	3	3	2
SLIV_15030	D6EE95	77.656	F1	Elongation factor G (EF-G)	132290	77106	82712	185850	226090	266520	285410	322190	393130	482390	133590	327580	3858.1	374430	515940	199120	145100	1196500	129000	697110	666170	256330	183180	498370	1879500	1827100	869320	4520000	2438500	1837100	1321300	1063800	1661700	66093	35674	22963	0	95268	4	3	2	4	3	4	5
SLIV_24940	D6EE97	115.48	A	Tricorn protease homolog (EC 3.4.21.-)	0	0	0	0	0	0	0	0	0	22861	0	0	0	0	8249.8	207.6	0	0	0	0	0	0	2052	0	1867.4	0	9008.9	330850	482130	238180	96497	164810	192380	0	0	0	0	0	0	0	0	0	0	0	0
SLIV_24945	D6EE98	12.444	F1	Hit-family protein	316820	342060	290230	438230	441980	533370	568630	453570	511900	1045300	728010	1330100	138240	856460	1058500	595660	435620	2735800	1051000	1911200	2384000	1104300	1563800	1828200	4327300	9119900	2271400	20451000	10159000	8571100	5917900	8244000	9518600	680550	655650	543080	406580	1004600	4	4	3	5	3	5	6
SLIV_25105	D6EEC9	53.011	X	Secreted protein (Sec) - Protein with Alpha/Beta hydrolase fold (IPR029058) and Peptidase S33 tripeptidyl aminopeptidase-like, C-terminal (IPR013595)	705960	690290	746920	1033200	1178000	2004900	1708900	1918500	1870100	1946200	1678700	3332200	901690	3279100	1211700	791680	661380	2282600	902340	2245700	2408800	1177400	858560	1021100	3958100	4710900	2065400	5538600	4130100	2001500	771070	2311400	3293700	1750500	1112000	1665600	2218500	1860200	9	7	5	5	7	9	6
SLIV_25165	D6EEE0	52.439	A	Glycine--tRNA ligase (EC 6.1.1.14) (Glycyl-tRNA synthetase)	0	0	0	0	0	8449.2	11163	0	6541.1	40970	0	0	0	9350.9	15104	0	0	26582	0	23053	11133	4536.1	11552	18669	52640	18938	20098	246270	244230	142100	29744	22007	55487	9892.2	5576	4931.9	9115.5	5048.6	0	0	0	0	0	1	1
SLIV_25205	D6EEE8	16.155	X	Secreted protein (Sec) - Unknown function	24300	0	0	0	0	39811	46738	320550	292140	79257	263210	522230	185030	466660	15144	36179	25060	0	471700	166640	0	18597	17639	0	0	0	0	0	82853	0	11655	0	0	993360	635420	136780	179710	689880	1	0	0	0	0	1	1
SLIV_25270	D6EEG3	24.991	X	Secreted protein (Sec) - Unknown function	0	41683	3144.3	201310	175350	596050	648660	125990	636670	1175600	36478	0	0	1334800	514430	452150	379580	1511900	46622	1161000	777640	429640	505210	629220	1901000	3249800	969710	0	0	0	21084	0	0	0	0	0	0	0	0	1	1	2	1	1	2
SLIV_25470	D6EEK1	127.3	X	Secreted protein (Sec) - Peptidase	75607	96003	61083	103570	133350	147630	155440	209380	261680	286900	136350	214520	82290	317520	141380	101500	91190	296030	83582	240630	267600	151710	105470	105500	1219500	1431700	245970	2927700	2238300	1455700	606680	1930400	1726000	2101700	1034000	2484500	2282900	1421500	11	11	10	9	10	8	9
SLIV_35310	D6EEN8	7.1787	A	Potential cold shock protein scoF	5123900	2542900	4866600	6866300	4579000	6843400	8295700	14926000	16051000	17015000	11968000	23957000	9845800	21401000	4482000	1852500	1081600	8003200	4334100	7359900	5175000	3209800	1924500	2778800	7443700	7194400	4392600	6765400	10843000	5758900	3855700	9356000	9689000	695490	347070	0	646780	1182400	2	2	2	2	1	3	4
SLIV_35415	D6EER0	108.58	X	Secreted protein (TAT) - Soluble quinoprotein glucose/sorbosone dehydrogenase	8881.2	5913.6	7495.7	9742.9	16824	24240	18127	157460	34383	15283	24184	23610	11980	26361	6158.5	6472.5	13002	48155	34286	59040	53028	34910	16911	30589	89473	128540	31433	57914	21621	17805	0	29879	38821	20523	17663	19426	30992	21576	1	1	1	1	2	2	1
SLIV_35445	D6EER6	35.27	A	Formyltransferase	16706	0	9319.2	13139	30335	0	0	42193	49809	0	0	0	0	0	15277	0	13261	60161	0	0	0	0	10148	0	101620	89677	42332	582660	477620	396560	175200	274700	472370	0	0	0	0	0	1	0	1	1	1	0	0
SLIV_35450	D6EER7	49.776	A	Peptide monooxygenase	4357.6	3577.6	0	21875	17205	129110	28471	257600	157800	1293700	429710	80337	14690	0	15395	11727	36206	0	0	0	18142	9055.7	7907.9	23145	18938	7842.1	0	464670	206880	139010	256690	195890	213820	8732.6	32639	10480	40935	0	1	2	0	1	3	2	2
SLIV_35470	D6EES1	37.375	E	Secreted Lipoprotein (Sec) - Iron-siderophore binding lipoprotein	66003	11338	20032	176940	227410	496210	385220	188740	114110	1102400	46450	47696	8972.1	497750	270810	228690	256180	612430	64068	524050	575230	168050	262660	674110	1933500	1808400	662960	5218200	3961100	3133800	1382000	1392500	2013900	1150500	610120	1054000	1240300	919650	3	1	1	1	2	1	1
SLIV_35570	D6EEU2	43.767	E	Secreted Lipoprotein (Sec) - Quinoprotein amine dehydrogenase, beta chain-like (IPR011044)	12710000	11808000	11842000	18021000	28110000	28628000	29142000	25185000	37589000	31324000	19484000	37006000	12504000	42281000	58813	884230	285810	4009700	133450	223270	95568	20733	41762	867020	385860	40843	26234	14641000	14429000	6841100	3597900	6237100	7954800	56132000	32086000	33944000	59191000	43504000	28	29	30	29	30	33	32
SLIV_35580	D6EEU4	42.134	E	Secreted Lipoprotein (Sec) - Quinoprotein amine dehydrogenase	9297000	10914000	8968000	16523000	26641000	32344000	25250000	21411000	35763000	36644000	14935000	25009000	9495500	43356000	40739	159970	54647	1643500	5211.9	70185	34532	25348	21442	226040	100820	109750	72565	20470000	26006000	13881000	7672700	7391700	9688000	90291000	41072000	69534000	78746000	73351000	28	29	28	34	32	42	41
SLIV_35720	D6EEX1	45.667	X	Secreted protein (Sec) - Unknown function	0	0	3457.9	0	5676.4	18187	0	0	0	0	0	0	0	46394	18041	3125.5	16636	63812	7363.9	61264	62395	0	24599	40056	100290	0	79731	1134300	537300	365630	178440	382220	416770	0	26970	28259	0	21058	0	0	1	0	1	1	0
SLIV_35790	D6EEY5	46.07	X	Secreted protein (Sec) - SGNH hydrolase-type esterase domain containing protein (IPR013830)	28981	59579	26396	43725	52064	138520	110070	119870	55215	60136	0	76362	0	95716	31364	104020	66164	83820	59256	280770	143590	104080	103190	16163	170080	237960	19516	0	49739	0	0	0	0	0	0	22724	35338	39074	1	2	2	1	1	2	2
SLIV_04650	D6EF40	31.646	X	Secreted protein (Sec) - Peptidase containing LysM_dom (IPR018392) and Peptidase M23 (IPR016047) domains	859100	718020	612780	1399600	2021400	1696800	2583700	3236900	4454700	5279000	1925100	4167600	854100	3969700	178880	198760	141310	704810	87293	355080	145630	34265	241150	431610	1471100	1773900	471880	0	0	0	0	0	298000	3243100	1884700	1455900	2468000	2038700	3	4	4	4	5	6	6
SLIV_04750	D6EF59	27.293	A	Nucleotide sugar-1-phosphate transferase	11443	11139	8644.4	16815	31926	4666.4	0	0	24556	0	0	17944	3652.8	0	18098	0	9878.8	63130	58620	0	0	0	16831	16805	165270	394890	64187	1456000	292950	322760	151110	449780	561800	181700	55984	258410	527130	398850	1	1	2	2	2	1	0
SLIV_04895	D6EF89	39.155	X	Secreted protein (Sec) - Oxidoreductase	41911	59266	19616	75040	71887	185220	160190	108840	207190	123980	0	214750	0	186550	57575	52675	40699	142690	53278	136360	109210	11893	0	76375	85172	178820	35054	86384	409860	145530	0	0	308760	0	0	40529	72931	76583	2	3	1	3	2	3	3
SLIV_04955	D6EFA1	88.969	X	Secreted protein (Sec) - Soluble quinoprotein glucose/sorbosone dehydrogenase	6537.7	10061	12484	18967	22379	25768	25984	0	0	47044	15835	26091	12118	30250	24455	19572	1097	85417	70065	82445	48474	29576	16448	30332	169490	173000	60007	594430	596910	359000	72459	160480	177010	282720	74647	36328	64079	11199	2	1	2	2	2	2	2
SLIV_04960	D6EFA2	77.034	X	Secreted protein (Sec) - Glycosyl hydrolase	38995	28475	36883	43512	89896	0	70416	65431	57096	213730	49826	87533	51090	82906	119460	0	13866	80042	0	56225	249150	64260	32426	0	250870	450510	67143	163160	90486	141070	89583	140050	201720	38121	43985	55100	80189	49851	1	1	1	1	1	0	1
SLIV_15060	D6EFE3	144.6	A	DNA-directed RNA polymerase subunit beta' (RNAP subunit beta') (EC 2.7.7.6) (RNA polymerase subunit beta') (Transcriptase subunit beta')	4205.5	4260.1	2244.9	3419.7	4752	2845.9	4542.5	9109.8	7929.3	0	3310.7	8431.2	1863.7	4414.7	18424	9198.3	11494	11668	12405	21991	14734	9720.3	13519	14610	51019	24616	20214	70411	63542	41999	29251	29909	59187	14752	11433	22946	32608	16726	1	1	1	1	1	1	1
SLIV_15065	D6EFE4	128.48	F1	DNA-directed RNA polymerase subunit beta (RNAP subunit beta) (EC 2.7.7.6) (RNA polymerase subunit beta) (Transcriptase subunit beta)	5371.4	1819.7	2563.1	0	2584.9	0	0	13148	20466	7176.2	8866.7	22297	0	9307.9	2148.7	1917.3	0	0	3124.2	0	7625.3	12239	1206.3	0	0	16492	0	0	0	0	0	4504.5	0	0	0	0	0	8870.7	1	1	1	0	1	0	0
SLIV_15070	D6EFE5	13.209	r	50S ribosomal protein L7/L12	3096100	2396600	1195900	2700900	3298000	4792200	5533900	7433400	4130700	10583000	3584000	7299100	478260	6877000	5485000	3925300	3170700	13730000	3475600	11403000	11472000	4975700	3600200	6229000	29626000	24093000	14663000	122530000	153970000	88034000	50376000	37988000	41323000	12035000	5474400	6300500	10094000	7433400	8	7	7	7	7	7	7
SLIV_15080	D6EFE7	30.048	E	Secreted Lipoprotein (Sec) - Putative lipoprotein localisation LolA/LolB/LppX-like protein (IPR029046)	1451800	1391400	1246800	2109500	3107200	2365500	3424800	3871200	3607800	3979800	2395800	4805100	2092400	5278600	2340400	1311500	694670	4938400	2646500	5509700	2075700	1451000	769520	1577100	4060800	7545400	2309700	2829700	743430	649770	421550	619970	830060	2595300	2240700	992130	1730800	1973800	12	12	11	10	10	10	11
SLIV_15115	D6EFF3	43.483	A	Aspartate aminotransferase (EC 2.6.1.1)	19942	8313.2	0	0	0	129610	98260	205660	280730	316530	0	138450	0	190460	281340	149620	118560	402800	141930	297440	369160	81920	80455	281420	1327400	697290	108970	6317200	2710700	2758200	941990	1040000	1806600	0	0	0	91683	0	1	1	0	0	0	2	1
SLIV_15200	D6EFG9	17.959	A	UPF0234 protein SLIV_15200	430150	283520	334740	363850	651540	773520	1371500	1548200	1326000	1598600	1252100	3139000	710660	1450200	161890	180100	37135	1360900	990170	1330100	650740	361250	217100	479210	2883000	3841600	936210	3044000	1072100	676690	157960	707520	724120	167640	73983	90645	271400	345940	6	5	4	3	4	5	8
SLIV_15350	D6EFJ9	42.384	B	Integral membrane protein - Lipoprotein localisation LolA/LolB/LppX (IPR029046)	5055000	5282800	4845900	7723400	10834000	8834900	10319000	10978000	16007000	15055000	11248000	17840000	5661400	19947000	10950000	6417300	4152700	24517000	10589000	24829000	11779000	8478600	5780500	6845300	25766000	44757000	16316000	129620000	88942000	60811000	33264000	69780000	78882000	44249000	27124000	29404000	42350000	32997000	19	16	14	19	17	20	22
SLIV_15370	D6EFK3	44.863	A	Fumarylacetoacetase	159940	167080	137000	201120	310500	188650	107810	192290	206690	108180	52984	92910	36709	119330	350300	122530	83536	442190	186410	393570	287800	179990	160380	306030	838500	952230	552790	3005700	2975300	1777100	819380	1706300	2029300	0	80969	95298	211440	75511	4	4	4	4	3	4	3
SLIV_15525	D6EFN3	106.08	B	Integral membrane protein - Putative bacterial transcriptional activator (IPR005158)	6194.5	2866.5	4275.5	13104	16380	12641	15187	15094	18248	31130	0	0	0	30154	0	0	1531.6	32149	0	30419	0	0	10134	13989	46636	84645	24587	8647.7	0	2561.1	0	0	0	0	6316.4	0	0	0	1	1	1	1	1	1	1
SLIV_15530	D6EFN4	37.716	X	Secreted protein (Sec) - Unknown function	59966	81542	49900	65593	326980	53392	145980	110890	207440	250080	183050	136960	70156	146370	50613	68755	32718	557420	375470	740500	409410	270150	144080	312800	974420	1120700	628740	988290	384260	321620	134530	102590	70707	241360	144630	298030	423140	164430	2	3	2	2	3	1	3
SLIV_15535	D6EFN5	22.994	E	Secreted Lipoprotein (Sec) - Unknown function	491100	413910	471790	688730	640320	549180	761590	706810	1188900	719730	803080	619470	218350	1554800	782050	96039	151570	926850	294030	690250	927240	522230	309910	474050	1275300	1980200	941810	531800	685730	260770	148230	350480	326050	600610	613910	377470	540760	355430	3	3	3	3	3	2	3
SLIV_15540	D6EFN6	33.599	A	Uncharacterized protein	0	8021.3	2679.4	10094	6249.5	0	0	31657	43461	0	13745	0	0	45575	17982	0	0	0	0	0	0	63790	48373	0	29878	0	95821	0	0	0	0	0	0	0	0	0	0	0	0	1	1	1	1	0	0
SLIV_15625	D6EFQ3	24.123	B	Integral membrane protein of unknown function	789520	761870	546110	1321500	1410000	1235700	1621700	1729300	2362900	6277700	1419800	3542400	538230	2837900	749320	149610	294630	1185500	608500	1329400	755680	450400	336280	479080	1381700	1681100	711650	3188900	2943200	1429400	897700	1568200	1636300	2065300	2972000	991890	2088300	2907100	3	2	2	3	3	3	4
SLIV_15645	D6EFQ7	37.867	X	Secreted protein (Sec) - Unknown function	79974	811.21	113400	191180	299410	314150	409870	177200	219660	191440	168110	316500	211510	271320	117390	21342	0	508240	412430	639270	259520	219740	102860	200710	317100	1277000	451790	858040	243100	126790	67652	311680	334850	598690	170730	326090	596690	590180	1	1	1	1	1	1	1
SLIV_25720	D6EFU9	14.236	A	Organic hydroperoxide resistance protein (Uncharacterized protein)	0	0	0	0	0	0	0	0	0	0	0	0	0	0	0	0	0	0	1992.8	0	0	0	0	0	0	0	0	0	0	0	0	0	0	0	0	0	0	0	0	0	0	0	0	0	0
SLIV_25740	D6EFV3	32.696	E	Secreted Lipoprotein (Sec) - SGNH hydrolase-type esterase domain (IPR013830)	0	31189	19924	32916	56410	86076	62908	102630	117300	30589	0	68666	0	0	42748	70824	64297	172360	35266	136440	52497	37082	41017	79257	82339	94142	62127	0	0	64644	0	0	0	15548	121660	139720	0	133940	0	1	2	1	1	2	1
SLIV_25750	D6EFV5	43.797	F1	3-oxoacyl-[acyl-carrier-protein] synthase 2 (EC 2.3.1.179)	255480	159210	81755	179540	235530	301180	321740	746660	935250	628610	134560	700010	18125	562070	515920	176850	248080	270790	37259	206990	382240	227490	185960	339930	935750	225770	255140	436890	590170	417540	196070	215870	259630	34551	0	0	0	0	2	2	2	2	2	2	2
SLIV_25755	D6EFV6	8.9169	F1	Acyl carrier protein (ACP)	91526000	87156000	62406000	91659000	153930000	158800000	155090000	170590000	236920000	324640000	101510000	200410000	5274100	222710000	92360000	56774000	46750000	146720000	26133000	160640000	187700000	112850000	77063000	83460000	271280000	287740000	135980000	644070000	436680000	322420000	253830000	318190000	343860000	177880000	109210000	133600000	221210000	142760000	7	6	7	8	8	8	7
SLIV_25760	D6EFV7	35.981	A	3-oxoacyl-[acyl-carrier-protein] synthase 3 (EC 2.3.1.180) (3-oxoacyl-[acyl-carrier-protein] synthase III) (Beta-ketoacyl-ACP synthase III)	0	0	0	0	0	0	0	0	0	0	0	0	0	0	8764.2	7478.1	13732	60486	0	60309	52939	13679	35242	60534	90284	83622	40446	351780	245510	233900	68703	74509	165600	0	0	0	0	0	0	0	0	0	0	0	0
SLIV_25765	D6EFV8	32.075	A	Malonyl CoA-acyl carrier protein transacylase (EC 2.3.1.39)	0	0	0	0	0	0	0	0	0	0	0	0	0	0	0	0	7346.7	40979	0	0	0	0	0	0	86613	72633	0	246660	249130	112010	60772	0	89716	0	0	0	0	0	0	0	0	0	0	0	0
SLIV_25840	D6EFX4	16.984	A	Thiol-specific antioxidant protein	89224	83526	59364	135120	122690	201620	323480	205170	68037	87566	34056	150730	0	143780	290150	143960	295860	859660	222260	517960	742340	156090	224010	704920	2351600	1326700	1189900	5184800	1298100	1415400	427750	985460	1929500	141730	133960	116180	109900	85262	3	3	3	3	3	3	4
SLIV_25845	D6EFX5	20.387	A	Tellurium resistance protein TerE	180000	134850	135270	195760	207110	113310	322400	609540	661010	454030	344560	717060	221360	481310	397000	126360	43024	1506200	1284200	1005500	712100	331960	132140	853160	5610100	5129600	1869400	19266000	8012500	5306500	2618300	8421600	10380000	196470	87721	348950	251320	340530	3	5	4	3	4	2	3
SLIV_25850	D6EFX6	20.413	A	Tellurium resistance protein TerD	0	0	0	0	0	0	0	33558	80211	0	21496	95359	17868	28147	0	0	0	0	5108.8	0	55773	0	0	0	254070	0	0	1711400	1039300	380140	168290	196640	1305600	0	0	0	0	0	0	0	0	0	0	0	0
SLIV_25960	D6EFZ8	40.869	B	Integral membrane proteins - Peptidoglycan binding-like protein	1682700	1057100	1450100	2558800	3156200	3014900	2857500	2974800	1796600	3683800	1804200	4888900	1142000	3938300	2508100	1021100	444090	3357700	1463900	3556100	4618300	3134800	1227400	1902600	5299600	6822300	3031300	1447900	1086000	391980	204400	594760	681190	2308200	2210100	2257900	2995300	2573000	6	6	6	6	6	6	6
SLIV_26065	D6EG20	68.559	X	Secreted protein (Sec) - Uncharacterized protein	1109300	896880	845910	1916900	2495500	2332300	2335600	3358400	3427700	3956700	172850	5427700	29160	4962200	2300400	1168000	436020	155590	2186200	4316900	4315800	3698800	18031	1566600	3897400	7014200	112730	3859100	4380700	2300000	852080	2093000	2257800	5158500	3336700	2739600	4919400	4074900	3	4	3	3	4	2	4
SLIV_26110	D6EG30	22.652	B	Integral membrane protein of unknown function	110460	132480	134870	175690	180600	240950	180030	297560	271340	197970	219690	473240	32427	286120	187640	0	17003	742120	373670	749680	280130	155180	0	121280	1311800	707320	732580	2764400	1369700	794780	334200	1619100	1634000	315180	292790	259790	114280	376920	1	2	1	2	2	2	1
SLIV_26115	D6EG31	42.414	B	Integral membrane protein - Terpenoid cyclases/protein prenyltransferase alpha-alpha toroid (IPR008930) with PFTB repeat (IPR001330)	307730	128040	253900	453170	683530	594600	669590	966470	1142700	1230500	1010800	2036600	741930	1200700	343060	155130	0	587790	576350	995330	417190	397440	187070	313160	355940	1263500	555520	641770	464780	223840	66345	179600	247650	447310	419890	254850	401210	525590	2	2	2	2	2	2	2
SLIV_36045	D6EG84	55.13	A	Catalase (EC 1.11.1.6)	16973	13891	8575.8	17509	22025	53080	45015	99215	119660	87894	58604	334830	84343	162900	95488	39352	31271	108930	146070	84451	273460	22403	56911	56834	195570	46856	73705	1300500	450340	490340	207910	822530	979440	35918	82888	38722	211520	59849	1	1	1	1	1	2	2
SLIV_36310	D6EGD9	9.8659	X	Secreted protein (Sec) - Unknown function	0	0	0	0	0	0	0	0	0	0	0	0	0	0	0	0	0	0	0	0	0	0	0	0	0	0	0	1790800	0	799250	0	0	0	0	0	106760	175370	76380	0	0	0	0	0	0	0
SLIV_36485	D6EGH5	17.59	P	Secreted protein (Sec) - Peptidoglycan binding protein	4334600	2908200	4526300	5839000	7553900	10424000	10395000	7612100	9762900	10910000	8745600	13002000	4057700	13303000	7661800	4683300	2764300	11727000	4912300	13588000	12519000	6505700	3176600	6060200	20535000	17755000	9786000	18111000	16338000	5521600	3721300	7156400	7952900	5019300	7807600	5873400	8049700	5486500	7	6	5	6	6	7	7
SLIV_05200	D6EGJ5	40.433	A	Transaldolase (EC 2.2.1.2)	132020	54265	65449	171160	113740	362510	381850	276780	329460	226900	175640	399480	191990	314730	535170	172480	142670	753410	588660	1006900	396160	231880	222940	332260	1286600	1801900	778710	1851800	1782700	837320	439510	481530	1229100	183180	96619	273670	404850	158130	6	4	6	6	5	6	7
SLIV_05220	D6EGJ9	31.951	F1	6-phosphogluconate dehydrogenase	2444.8	6961.9	0	0	0	0	3562.5	0	0	0	0	0	0	0	6300.6	3047.6	0	0	0	4714	0	0	0	0	0	0	0	0	0	0	0	0	8712.1	0	0	0	0	0	1	1	0	0	0	0	1
SLIV_05320	D6EGL9	44.978	X	Secreted protein (TAT) - Quinoprotein alcohol dehydrogenase-like superfamily (IPR011047)	13350	17202	8214.7	0	0	0	0	0	0	68165	0	54351	8296.6	0	0	0	4913.8	75954	33842	0	14891	0	0	44941	76533	84100	32004	1662000	1288000	865040	342750	515980	739220	0	0	0	0	26379	1	1	1	0	0	0	0
SLIV_05335	D6EGM2	23.134	A	Uncharacterized protein	109650	21196	0	5089.7	0	23096	333200	84516	317780	143370	237570	472190	148660	96074	42697	37561	6205.9	76177	25406	57105	56910	34324	12967	29617	105560	0	0	819210	669920	190510	154820	338700	350730	2278500	159290	645820	1047600	1721100	1	1	0	1	0	1	1
SLIV_05355	D6EGM6	39.548	B	Integral membrane protein of unknown function	33976	12598	13935	35403	60988	49158	27462	43482	87628	0	0	85033	0	80653	25182	13152	9797.2	32836	15628	0	0	12368	0	0	51078	50639	0	81604	175130	107300	32686	0	29326	71982	33455	87719	0	46920	2	1	2	2	2	2	1
SLIV_05465	D6EGP9	17.867	X	Secreted protein (Sec) - Unknown function	635070	560350	439220	621030	867090	1353200	437270	1429600	1747000	4322000	888580	1328000	0	3446300	49242	0	17251	2045700	169270	1442200	553590	204400	474020	768810	1769800	4680900	215290	2335400	1073500	208470	630030	1397300	810360	1054900	237490	124140	331760	257420	2	2	2	2	2	5	2
SLIV_05705	D6EGU7	23.393	X	Secreted protein (Sec) - Uncharacterized protein	172670	237780	146770	248610	281550	268580	337560	306100	448160	146240	171210	470050	0	585740	298000	203690	194710	492160	300130	506890	396400	130520	251120	222550	644560	909250	427860	288160	264360	241850	81819	79469	0	669710	427220	320960	435780	573760	2	2	2	2	2	2	2
SLIV_05725	D6EGV1	10.822	A	Putative pterin-4-alpha-carbinolamine dehydratase (PHS) (EC 4.2.1.96) (4-alpha-hydroxy-tetrahydropterin dehydratase) (Pterin carbinolamine dehydratase)	2934.8	0	0	0	0	0	0	0	0	0	0	0	11983	13650	0	8564.3	18259	0	0	0	0	0	0	0	0	0	10140	0	0	327460	0	874220	0	9620.6	0	0	0	0	1	0	0	0	0	0	0
SLIV_05770	D6EGW0	14.334	A	Peroxiredoxin OsmC (IPR019904)	0	0	0	19909	0	0	0	0	0	0	0	85683	0	0	59789	0	0	263050	72227	142130	160800	70173	100360	0	568800	559850	245000	4057700	1090900	1269500	453980	1907300	785920	0	0	0	0	0	0	0	0	1	0	0	0
SLIV_15750	D6EGX3	7.1878	A	Potential cold shock protein 1	11534000	26924000	11734000	18376000	19854000	57779000	96495000	37189000	50177000	133540000	24080000	139290000	9376200	84631000	17887000	15523000	6291800	44000000	14480000	61125000	42371000	23856000	26121000	34975000	82662000	63988000	33578000	63063000	162320000	104010000	57873000	105870000	76898000	11657000	9085100	1399000	7648400	7404200	3	4	3	4	4	4	4
SLIV_16315	D6EH88	17.626	X	Secreted protein (Sec) - Unknown function	0	0	79382	0	97645	117910	172330	0	0	0	0	0	0	0	191690	0	35722	0	0	0	169300	0	91599	0	0	0	0	2860300	1915700	957220	605170	1601200	1661600	0	0	0	970420	0	0	0	1	0	1	1	1
SLIV_26345	D6EHC4	41.64	E	Secreted Lipoprotein (Sec) - EfeO-type cupredoxin-like lipoprotein	20071	0	13108	19664	36848	31867	0	0	10990	30604	0	0	15945	0	20081	24828	9317.5	0	0	77591	27130	22720	7259.9	0	0	56282	37164	0	50177	30694	34017	0	19417	152370	75196	93116	157460	109350	1	0	1	1	1	1	1
SLIV_26365	D6EHC8	48.249	B	Integral membrane protein implicated in iron acquisition and transport	1679100	2180800	1060700	2699100	2652000	5492500	5803800	9545200	9792600	15158000	3543100	7848300	866630	17556000	2600100	2521600	3065500	11410000	2275900	6426900	5102500	2298400	4126300	7039800	19794000	22782000	7173700	33935000	14680000	12827000	5412300	9075600	11257000	5897200	4815200	4000400	6153300	5157500	15	16	15	14	14	17	17
SLIV_26390	D6EHD2	31.143	F1	Methionine aminopeptidase (MAP) (MetAP) (EC 3.4.11.18) (Peptidase M)	77498	80598	52510	72704	84038	74593	86270	128400	160980	106400	63528	211170	32638	103530	280030	156500	187290	401180	215760	277210	428320	200760	217520	238300	797150	751160	428570	0	0	0	0	0	0	0	0	0	0	0	1	1	1	1	1	1	1
SLIV_26520	D6EHF9	24.055	B	Integral membrane protein of unknown function DUF3105	164100	245510	139550	253570	320270	190090	245030	608490	0	609620	285930	674030	27064	858480	269900	216350	149130	511390	0	399610	171790	127630	154620	204740	506300	595170	218190	0	0	0	0	0	0	0	146850	0	0	0	1	1	1	1	1	1	1
SLIV_26595	D6EHH6	12.969	A	Isomerase	65810	63435	89510	41372	40863	53949	136600	0	82277	48699	99643	197250	1120900	98289	117730	64075	35638	263460	184350	200720	210420	0	51028	0	656850	1514200	252310	3790600	2700700	2211000	690180	1418000	2664900	118510	0	0	0	106020	1	2	2	1	1	1	2
SLIV_26680	D6EHJ4	24.175	X	Secreted protein (Sec) - Putative 23.9 kDa protein in glnII region (Secreted protein)	1331600	955790	992930	2045300	2603000	1798200	2525100	2054700	3361900	4087600	2008100	4932900	835560	4090800	1124700	592630	129090	1379500	549690	1786300	1481800	1043200	513910	807400	2234700	2784500	1030600	1665900	844580	802990	450570	1133200	1210700	9020600	10207000	6347300	10690000	8111600	5	5	5	5	4	4	5
SLIV_26725	D6EHK3	52.567	A	Glutamine synthetase (EC 6.3.1.2)	81171	69895	51475	83485	87483	133620	43769	90137	82500	72499	38728	95454	19376	128990	131900	71224	52875	284090	25368	176190	58439	43381	98584	30041	348300	531980	221170	400360	201630	130200	106290	111520	149370	0	16036	27124	0	78834	3	3	3	2	2	3	1
SLIV_36615	D6EHP6	12.161	A	Antibiotic biosynthesis monooxygenase (Uncharacterized protein)	45895	156990	145540	68206	285290	142860	0	123640	174030	111950	107520	215210	58575	192070	95206	40290	152740	339530	86529	193150	184730	156890	113350	278360	652030	340630	226420	1657700	1409300	1443100	708110	1061500	1152500	12819	137400	56604	126580	63725	1	1	1	1	1	2	0
SLIV_36780	D6EHT2	25.619	B	Integral membrane protein of unknown function	0	0	0	0	0	86931	85265	0	0	132390	0	0	0	233760	42050	0	49335	86729	0	155870	0	51866	0	41804	134780	97812	59654	0	0	0	0	0	0	402160	177330	124800	244670	0	0	0	0	0	0	1	1
SLIV_05960	D6EI45	12.21	A	Glyoxalase/Bleomycin resistance protein/Dihydroxybiphenyl dioxygenase (IPR029068)	0	0	0	0	0	0	0	0	0	0	0	0	0	0	0	0	37611	0	0	0	0	0	0	62653	178290	0	0	1987600	1468600	826010	242090	494760	364700	0	0	0	148600	97829	0	0	0	0	0	0	0
SLIV_06015	D6EI56	16.092	A	Polyketide cyclase/dehydrase (IPR019587)	50131	4292.6	59782	22862	66895	156500	117820	120430	80853	67209	71625	48971	14260	66955	127720	155880	216670	771300	232100	736210	330190	76940	136850	515710	1040100	1272700	177900	2576000	2655100	1487400	243380	95827	898130	79072	0	0	0	0	3	1	2	1	1	3	1
SLIV_06145	D6EI82	49.787	B	Integral membrane protein - Hydrolytic protein	259270	326140	314010	782600	658660	633340	816570	1073000	982500	1470200	431960	689090	20113	1778300	882620	438550	468370	1842200	321600	2122400	1625700	762340	462420	1107500	2662100	4611100	2101700	3759600	1575900	858760	739630	1366900	2022800	2281400	1278200	2010900	2510400	1331100	3	4	6	6	6	3	5
SLIV_06170	D6EI87	58.495	X	Secreted protein (Sec) - Peptide/nickel binding protein, MppA-type (IPR030678)	209800	198950	143780	264190	461420	667670	778870	637000	826130	1161300	194830	493640	102830	1146800	843710	680170	510270	2024900	461410	1975400	1181700	735770	781990	1133600	3700900	4345400	1783600	11279000	7030800	5079900	2885200	3131100	5417100	1779200	981730	1512500	2250000	1639000	8	11	9	11	11	13	12
SLIV_06210	D6EI95	33.218	A	S-adenosyl-L-methionine-dependent methyltransferase (EC 2.1.1.-)	5683.2	8381.9	0	22173	61829	0	49611	0	0	0	0	0	0	0	0	0	0	0	0	3531.4	0	3646	0	0	0	0	18755	68852	484220	204890	0	57558	44885	2289100	0	0	546020	1964600	1	1	0	1	1	0	1
SLIV_06340	D6EIC1	54.075	X	Secreted protein (TAT) - Protein containing Carbohydrate-binding/sugar hydrolysis domain (IPR006633)/Pectate lyase superfamily protein (IPR024535)	537650	655560	552090	991880	1261200	1277700	1282800	1246400	1261700	1764900	945040	1280900	369210	1646400	541880	277910	149980	1001800	503310	1081700	1146600	522350	327980	632790	2797800	3123200	871840	2413500	694850	168610	304590	238460	666350	387450	582990	369150	552370	510150	5	6	6	7	6	6	6
SLIV_06395	D6EID2	63.283	X	Secreted protein (Sec) - Gamma-glutamyltransferase	29112	13902	25999	46135	72321	124100	90096	38100	18188	228410	31359	0	0	24762	4108.7	22345	8454	64083	13134	213660	146190	74365	0	114390	91756	252580	181430	6368200	4319900	2949100	789770	895990	2365000	125440	108180	146380	414590	194430	1	2	1	2	3	2	3
SLIV_06435	D6EIE1	55.919	P	Secreted protein (Sec) - Amidase	46331	26731	32388	0	3947.9	35834	8619.4	0	63057	39328	56723	78215	59778	83072	0	10372	20548	29453	0	61081	38832	10779	13837	26470	64078	29369	12553	0	37295	22718	0	0	0	251160	120270	19158	70087	129440	1	1	1	0	1	2	1
SLIV_16375	D6EIE8	18.134	A	Calcium binding protein	37422	34307	16536	33325	0	49223	0	0	0	147040	0	104510	0	0	154060	62046	38298	238870	54538	290000	323460	84343	198680	228500	484800	395980	393290	1460600	1306800	836750	96727	580820	392270	0	0	23305	65097	0	1	1	1	1	0	1	0
SLIV_16460	D6EIG5	25.19	A	Iron-dependent repressor IdeR	86915	36877	47154	51529	0	90708	125760	0	184190	210330	111680	243980	0	105250	167290	100320	95077	397990	0	366130	283400	139060	105730	161980	702570	0	498900	0	1029700	375450	0	265850	438810	0	0	0	0	0	1	1	1	1	0	1	1
SLIV_16580	D6EIJ0	52.586	X	Secreted protein (Sec) - Protein containing FG-GAP repeat domain (IPR013517)	0	33292	37997	51743	78541	0	0	0	0	0	0	0	0	0	22590	31679	17520	66141	107110	124870	38006	53276	30959	64512	0	141400	130040	267130	0	64458	53036	105220	35670	107710	48115	118450	202920	91625	0	1	1	1	1	0	0
SLIV_16915	D6EIQ5	56.829	F1	60 kDa chaperonin 2 (GroEL protein) (Protein Cpn60)	188010	175470	65607	232830	289200	160400	297390	845140	762530	575510	128900	630670	30397	407660	1335900	396600	306300	1483900	365040	1008800	983910	276300	203730	514760	2864100	2313900	1161600	3665700	3644900	2771600	838590	1208300	1626600	611030	210530	636650	698070	300800	8	6	5	6	6	5	5
SLIV_16925	D6EIQ7	9.5696	A	ThiamineS/Molybdopterin converting factor subunit 1 (IPR003749)	438790	268450	165360	755620	819620	1448800	1375300	499340	1096300	1579900	510310	404180	14377	2028600	409230	311000	197800	853870	0	340660	837980	458160	291720	136670	909750	779040	596620	4925200	4416700	1936300	575580	2238200	3002200	360950	207430	216210	280170	140820	2	2	1	2	2	2	2
SLIV_16985	D6EIS0	32.61	B	Integral membrane protein - Carbohydrate binding module family 6 protein	11686	138710	117700	167530	170480	0	0	0	151840	0	0	333430	70047	0	241960	148980	126130	0	6603.6	0	0	178420	196590	204750	0	0	0	0	0	0	0	0	300930	0	0	316810	0	0	1	1	1	1	1	0	0
SLIV_17010	D6EIS5	20.344	A	TerE-lik protein	715380	394280	466030	797090	955230	1400600	1751800	1325000	1030000	1585700	746470	1924600	1044900	1105400	4030200	1193300	869180	10094000	6007400	7745600	6938200	3180000	2324200	4749300	14890000	28732000	11441000	28545000	12590000	8113700	5263500	16144000	15800000	3684500	1764400	3367100	3659300	2924400	3	2	2	4	3	5	6
SLIV_26875	D6EIT7	9.9942	A	Uncharacterized protein	0	0	0	0	0	0	0	0	0	0	384710	466910	119430	902940	216680	0	0	0	0	0	301640	0	0	0	0	855350	0	2988900	1425700	1394200	1172900	2664000	2081200	351240	237040	0	0	0	0	0	0	0	0	0	0
SLIV_26890	D6EIU0	108.05	B	Integral membrane protein - Integral membrane efflux protein	17377	23108	27445	33585	58196	33437	24804	65688	54764	59281	40845	74933	35123	58790	0	3852.6	0	0	5717.1	8266.5	5415.7	0	7644.2	5410	33738	27617	3925.6	24705	0	7008.1	0	11690	15286	30269	54120	17406	0	12348	1	2	2	2	2	2	1
SLIV_26900	D6EIU2	12.39	A	FeS cluster insertion protein (IPR016092)	2403900	2165700	1833900	3564600	3809900	3173200	3972900	6108300	8064200	7224600	2766700	6886800	1789200	8766800	5894200	3003800	2387600	10865000	3898700	7914600	10169000	5765500	4784900	5091100	17608000	25235000	10476000	20687000	12157000	8747100	5331300	11312000	11092000	8437500	5057400	4638500	6956300	4744100	4	6	5	6	6	5	6
SLIV_26925	D6EIU7	35.489	B	Integral membrane protein - Cytochrome c oxidase subunit II (Putative cytochrome c oxidase subunit 2) (EC 1.9.3.1)	1210200	1381400	472340	2785300	2695400	1939300	3214400	2847400	4165000	2765000	1648700	3220400	614360	3219800	2735500	1588300	1410500	8554300	1150800	7206000	3195700	954030	1473600	2527400	14226000	18805000	6051700	1611900	5408600	1430000	541140	868470	3075600	1335900	1380700	785030	1105200	1114700	8	7	6	8	8	8	9
SLIV_26955	D6EIV3	27.526	B	Integral membrane protein - Cytochrome C heme-binding subunit	877310	697090	790730	1027700	1557000	1261100	1521500	2628700	2146600	2122700	2375600	4199100	1983700	3188000	129990	51064	19013	599900	1733000	505280	183180	124990	46565	49819	2544600	5768400	1393800	531390	182010	89893	56382	1562900	564930	315140	462660	499400	1307300	1543900	3	3	3	3	3	3	3
SLIV_26960	D6EIV4	38.574	B	Integral membrane protein - Ubiquinol-cytochrome c reductase iron-sulfur subunit	91579	50434	38158	147340	172830	304180	304570	116690	288600	365710	75164	54000	9163.1	333590	1358300	1414300	1616000	3795900	461220	2367200	1928500	985420	1063600	1737800	7686300	6333700	3535600	22114000	13390000	9107600	5421300	8379600	11839000	595560	464760	455390	744430	376090	4	3	3	4	4	4	3
SLIV_27015	D6EIW5	8.879	A	Uncharacterized protein	1003100	1106900	1173400	1573900	1697300	1276500	93912	140360	0	0	0	0	37728	110010	243850	193230	203740	425580	26436	405600	456820	244340	146880	100040	743280	516890	315560	1651000	5764400	1283500	1751100	1649400	1037000	0	113840	0	209960	159800	2	2	1	2	2	2	1
SLIV_27025	D6EIW7	37.242	X	Secreted protein (Sec) - Protein with Endopeptidase, NLPC/P60 domain (IPR000064)	7454300	6596700	6890800	10387000	17427000	14158000	19793000	27168000	29732000	32688000	17591000	37831000	13163000	32682000	10020000	5418200	1801500	28764000	21509000	31884000	15535000	9830500	3900600	8786700	33993000	70708000	17895000	29232000	4830800	4913300	2587600	7791500	9386400	11617000	9475700	8720200	10843000	15888000	17	19	17	17	18	19	19
SLIV_27155	D6EIZ4	69.753	B	Integral membrane protein - Ser/Thr-protein kinase PK-1 (EC 2.7.11.1)	549360	431000	495090	715840	901530	1006700	967670	868770	1448400	1207700	867110	1338000	359650	1318500	1287000	519440	279340	1533700	752860	1745000	2745700	1313200	653800	951650	2759900	3020500	1666900	3880400	2995600	1058100	849630	2874100	3176100	2012800	1275500	1809200	2265100	1272700	9	8	8	9	10	10	10
SLIV_27180	D6EIZ9	13.318	N	Transcriptional regulator	14642	0	0	95104	70515	243310	151880	210610	98684	803070	0	0	0	203600	46455	46858	0	0	0	0	174280	0	51070	85348	0	0	0	1752200	2002200	350390	262820	0	506280	151450	59511	95421	0	0	1	0	0	2	2	2	2
SLIV_27185	D6EJ00	23.356	A	Thiamine-phosphate synthase (TP synthase) (TPS) (EC 2.5.1.3) (Thiamine-phosphate pyrophosphorylase)	18109	36091	30155	18511	29010	0	0	26375	0	0	8557.4	0	0	0	138070	23138	27968	72042	5596.2	44788	74059	95381	89786	92035	256320	211440	165500	198550	428760	281430	159080	104230	109760	0	0	0	0	0	1	2	2	1	1	0	0
SLIV_27255	D6EJ13	62.976	X	Secreted protein (Sec) - FtsI	18214	12642	16057	27409	32988	3824.1	6162.5	0	0	24822	0	0	1930.6	0	0	0	0	8344.6	0	13248	0	0	0	4195.7	0	6284.5	3096.7	0	0	0	0	0	0	0	27912	0	0	0	1	1	1	1	1	1	1
SLIV_27295	D6EJ21	41.095	F1	Cell division protein FtsZ	0	0	0	0	0	0	0	27660	25692	0	9058	62308	0	52301	0	0	0	0	0	8780.1	5856.7	0	0	10329	20782	8337.1	10894	152670	91173	0	72947	31866	34591	10604	4718.6	0	6434.2	25234	0	0	0	0	0	0	0
SLIV_27320	D6EJ26	41.139	A	cell division related (IPR019933. DivIVA_domain/IPR007793. DivIVA_fam)	1142900	344690	569660	758370	1553700	1882900	1656800	1838900	2197400	2903600	1206300	1836300	47713	1747500	2560700	1767600	1028600	4447200	890070	6368300	6510500	4660500	1213300	2996600	9540700	6096000	4945900	9407000	9846300	3524600	4834600	2601600	2481400	1672900	1342000	1112700	2852700	1502400	5	4	6	6	6	6	6
SLIV_27365	D6EJ35	59.538	X	Secreted protein (TAT) - Phospholipase D (EC 3.1.4.4) (Secreted alkaline phosphatase)	54265	52596	52048	76058	108880	13405	0	35820	69040	64662	0	102520	0	119590	84296	49604	40002	351010	174110	269260	132160	77085	42025	75085	431020	556680	209390	94566	0	0	0	9171.7	24761	0	0	0	0	0	2	2	2	2	2	1	0
SLIV_27370	D6EJ36	28.612	B	Integral membrane protein - DSBA oxidoreductase (Uncharacterized protein)	5415600	4561200	4489400	7073500	8612900	5612000	8672900	14274000	16919000	16685000	13519000	22842000	6813200	19725000	5309300	2470300	1822200	11731000	5765300	10806000	5390200	3250500	3567300	4217200	11506000	33270000	8289100	3823400	3265300	1824600	1076900	1336800	1434400	5217700	9158900	2528300	4142200	7676100	13	14	12	14	12	14	16
SLIV_27435	D6EJ49	46.522	A	Histidinol dehydrogenase (HDH) (EC 1.1.1.23)	0	0	0	0	0	0	0	26989	52376	0	0	12117	0	0	0	16591	12189	45289	0	0	0	0	0	27051	282540	127590	0	1466400	466050	376670	137990	116770	597120	0	0	0	204120	0	0	0	0	0	0	0	0
SLIV_27460	D6EJ54	25.08	A	Phosphoribosyl isomerase A (1-(5-phosphoribosyl)-5-[(5-phosphoribosylamino)methylideneamino] imidazole-4-carboxamide isomerase) (N-(5'-phosphoribosyl)anthranilate isomerase) (Phosphoribosylformimino-5-aminoimidazole carboxamide ribotide isomerase)	10107	19261	0	35591	24450	76091	35234	0	11851	52363	0	10788	0	18228	146900	135020	143940	368730	16947	292830	323640	46469	163310	287540	945970	989110	352090	4788500	2686200	2014500	1179500	1405500	1832200	0	68352	21550	18020	0	1	2	0	1	1	2	1
SLIV_37320	D6EJ99	18.515	X	Secreted protein (TAT) - Unknown function	65691	28808	174620	177890	257860	623060	459600	267250	256350	321320	315280	457780	194230	31923	525070	330590	56894	1315000	869410	1680400	1679700	774290	396010	957140	3112900	1513700	1691300	2320500	2943800	994230	920100	1363400	1881800	143570	72840	170260	249780	131120	2	2	4	3	3	4	3
SLIV_37465	D6EJD1	18.284	E	Secreted Lipoprotein (Sec) - Unknown function	0	0	0	0	0	0	0	194880	403900	487730	0	0	0	306010	0	0	0	0	0	0	0	0	0	0	0	0	0	0	0	0	0	0	0	0	0	0	0	0	0	0	0	0	0	0	0
SLIV_06710	D6EJL2	28.685	A	Thioesterase II	0	0	0	0	0	0	20942	0	626230	0	376070	703100	195110	440620	0	147700	77189	409400	185800	0	0	0	96159	0	60805	0	0	956230	0	0	285330	347230	453020	0	0	0	0	1755000	0	0	0	0	0	0	1
SLIV_06905	D6EJQ3	41.23	A	Probable allantoicase (EC 3.5.3.4) (Allantoate amidinohydrolase)	0	20584	0	0	18078	0	0	25194	0	0	0	0	0	22828	4505.6	0	26966	0	34409	34363	0	0	0	0	125470	10102	22237	37985	17256	39419	17264	3998.4	55364	0	0	17447	0	0	0	2	0	0	1	0	0
SLIV_06910	D6EJQ4	47.491	A	Allantoinase (EC 3.5.2.5) (Allantoin-utilizing enzyme)	2869000	2980200	2601400	2339800	4606600	0	6099100	4016500	5292700	3665900	3146200	7754100	2614400	4841400	0	230630	119180	0	3266	0	0	0	0	149450	66224	0	13109	1074900	2373300	842720	0	183660	229470	4469200	4843200	3564800	5002700	3946100	1	1	1	1	1	0	1
SLIV_06930	D6EJQ8	60.006	A	Malate synthase (EC 2.3.3.9)	24089	4016.8	19451	16751	15416	6254.1	18442	75176	80544	47698	23177	71018	30560	35026	27552	66836	37435	6522.8	31415	28051	24772	15374	2073.8	505.19	8396.2	7066.6	16550	16067	52570	18789	52000	98160	35469	264920	752.3	0	10030	0	3	1	2	3	2	2	2
SLIV_07015	D6EJS6	44.189	B	Integral membrane protein - Protein containing von Willebrand factor, type A domain (IPR002035)	194530	183150	152660	325620	429500	525080	633190	698900	785780	995550	423720	642400	102240	906940	223390	137630	115430	599180	40033	995360	436330	202400	215520	145650	598210	1323700	416690	423620	111980	170290	52425	24231	177450	1277700	707550	776370	959570	931810	7	9	6	8	6	7	9
SLIV_07020	D6EJS7	27.819	B	Integral membrane protein - Protein homoogous to annotated peptidases	270180	466340	295900	446810	489830	650910	821300	685010	701990	404550	545870	1173900	271660	913270	318580	277300	257800	333990	346250	338670	258920	137060	190500	275280	334270	239980	189020	120870	0	0	19713	22975	0	43934	0	116960	20103	0	4	4	3	4	4	3	5
SLIV_07040	D6EJT1	233.36	X	Secreted protein (Sec) - Protein containing Rhs repeat-associated core (IPR022385) and YD repeat	49083	80830	59359	110230	150040	121740	129800	68679	94579	149090	98053	127790	60257	136030	9320.6	2028	0	5044.4	0	8555.5	932.29	0	980.73	906.99	17079	0	0	4077	18846	13285	13652	7381.6	0	102570	49480	46737	105770	106180	4	7	6	6	8	7	8
SLIV_17120	D6EJW1	56.958	A	Phage tail sheath protein (Uncharacterized protein)	112990	64281	51069	135870	159990	186310	191090	110120	88179	36531	25882	588820	29629	59076	179630	89660	63396	431350	289960	426300	362250	21547	86861	160800	870010	878470	392100	527030	424190	294170	106260	137390	258040	0	0	31898	16231	17852	4	4	3	4	4	3	4
SLIV_17175	D6EJX2	48.544	B	Integral membrane protein - Membrane Protein with Galactose-binding domain-like (IPR008979)	774880	866300	769800	1427300	1930900	1604200	1850600	2374000	2549000	3325000	1640300	2236400	1041100	3566300	297030	163560	127860	715970	284850	773490	190760	194000	89179	225390	775250	730220	216820	285510	162310	0	152630	34688	83469	526040	481440	263740	511980	565470	7	7	6	8	7	7	7
SLIV_17195	D6EJX5	16.152	B	Integral membrane protein of unknown function	54019	90104	31208	167900	283100	451480	597890	45471	0	1672100	142170	119810	0	710960	28562	355630	279160	784010	43446	715480	69061	208480	242500	474190	1684500	1034500	625340	0	16258	3753.8	0	0	0	73989	60998	0	112170	98274	2	2	1	2	2	2	2
SLIV_17235	D6EJY4	23.675	E	Secreted Lipoprotein (Sec) - DR1885-like metal-binding protein	2029000	4086600	2030400	5110400	5097400	5715000	6658600	8177900	7187600	8927500	2516000	6950900	480140	8961400	4297100	3173100	2701200	9174500	1041200	6910600	4599800	2361600	3600200	3697400	14243000	15473000	7323800	472140	139540	95795	145780	154480	256430	88512	1793800	304570	67958	501150	4	4	4	3	4	5	4
SLIV_17280	D6EJZ3	14.244	A	Glyoxalase/Bleomycin resistance protein/Dihydroxybiphenyl dioxygenase (IPR029068)	0	0	0	0	36641	30760	41463	36381	0	111010	0	0	0	0	144200	113390	98120	184180	14647	15631	264750	117550	96560	0	0	0	0	0	802430	638240	396260	501080	445760	0	0	0	0	0	0	0	0	0	1	1	1
SLIV_17330	D6EK02	28.279	F1	2,3-bisphosphoglycerate-dependent phosphoglycerate mutase (BPG-dependent PGAM) (PGAM) (Phosphoglyceromutase) (dPGM) (EC 5.4.2.11)	0	0	0	0	0	0	0	0	0	0	0	0	0	0	0	0	0	29101	0	0	0	0	14723	38869	64098	74924	34670	153570	0	0	0	38115	0	0	0	0	0	0	0	0	0	0	0	0	0
SLIV_17385	D6EK12	22.808	A	Uncharacterized protein	6162.6	615.06	0	0	23398	41554	75695	0	0	0	0	0	0	46583	10549	4937.3	0	26156	12711	9338	2216.1	0	3851.1	16614	5581.6	38363	0	2119900	2336600	1069800	276020	653980	969650	134190	6292.9	8228	115170	0	1	1	0	0	2	2	2
SLIV_17480	D6EK31	21.694	A	UPF0678 fatty acid-binding protein-like protein SLIV_17480	13317	4686.2	3274.9	24598	27158	41472	95273	37784	33662	0	21203	59433	0	42069	131980	65860	4884.4	333640	89102	316550	135400	141220	72412	142050	407950	713810	290040	1636600	539500	270760	173790	599790	1352100	63223	24074	34985	76246	18070	2	1	1	3	3	3	4
SLIV_17550	D6EK45	9.6847	A	Uncharacterized protein	1320800	2269600	1958900	3176900	3751300	3794500	4312900	4841300	6514500	6521300	4190300	10253000	918580	7225700	1081400	850590	618270	2911100	1185800	2513600	1971100	837050	794430	1155000	3908800	5384900	1553200	4255800	3732000	2322000	1478400	2215000	2073200	2140500	2586700	1181000	1675700	1553900	3	5	4	5	5	5	5
SLIV_17555	D6EK46	31.771	A	Sulfurtransferase	298740	221720	95151	314190	324800	388700	325630	863100	1147900	931990	325140	815820	127240	920820	394990	312030	149560	1614000	636500	1367200	601190	401810	240580	366460	2295100	2575700	1085900	8727100	3527700	2785600	1361300	2677300	4035600	111220	294270	241130	216510	124760	6	6	3	4	4	4	4
SLIV_17560	D6EK48	25.537	X	Secreted protein (Sec) - Unknown function containing DUF2993 domain	127150	95406	91399	176290	163730	218230	2303800	163020	295250	201770	181690	3143300	444640	4663500	2613800	133110	97191	368210	166830	166850	2537600	141430	85361	98562	0	220420	213170	1179100	20807000	13691000	323420	674390	759850	726990	486260	495250	584080	6134700	1	1	1	2	1	1	3
SLIV_17615	D6EK57	64.406	X	Secreted protein (Sec) - 5'-Nucleotidase/apyrase (IPR006179)	9681.7	22091	8594.1	15512	36472	39566	20174	34120	2625.9	0	33784	68838	1220.1	42399	0	0	0	13343	0	0	0	0	0	0	30207	41554	11416	0	0	0	16269	0	0	0	0	0	0	0	1	2	1	1	2	2	1
SLIV_27515	D6EK77	28.371	A	Indole-3-glycerol phosphate synthase (EC 4.1.1.48)	96254	17157	46774	90399	124990	143950	145690	173040	123350	375240	55295	47191	0	296450	316310	132240	73867	233350	14395	252860	264790	159850	143550	168860	557600	446030	196180	1298200	1114800	590820	370500	558990	640370	202600	150250	82865	54810	87660	2	1	2	1	2	2	2
SLIV_27650	D6EKA4	24.15	N	Putative transcriptional regulatory protein pdtaR	17472	19963	8098.7	0	20451	14143	0	36358	45991	50087	0	57634	0	28207	44062	96867	67300	83287	54874	112610	211430	35123	90567	44783	181250	214170	76990	119000	732160	372100	466250	104260	150330	91234	0	0	0	0	1	1	1	0	1	1	0
SLIV_27675	D6EKA9	43.503	E	Secreted Lipoprotein (Sec) - Branched chain amino acid binding protein	0	0	0	0	0	25202	27889	0	34766	114350	0	40994	0	103000	102040	92160	131110	341160	106680	460140	341820	124410	153530	185730	507290	883640	426000	1262300	1034600	208420	197960	481320	468470	56150	101020	131780	112020	16589	0	0	0	0	0	1	1
SLIV_27710	D6EKB6	61.353	X	Secreted protein (Sec) - Protein with Lysozyme-like domain (IPR023346)	3042400	3499700	3129800	4688700	4938000	7705000	8014800	7450900	7035500	12384000	4222300	8062200	707270	11086000	7512400	5723700	4481800	16695000	4124100	18585000	12798000	6911400	6129600	8489400	31277000	31885000	13999000	34099000	27543000	14871000	7310600	12637000	13731000	7151600	3833100	6336700	7089300	4329200	18	21	18	19	19	29	26
SLIV_27725	D6EKC0	55.034	r	30S ribosomal protein S1	119120	77039	72956	99004	164380	164540	177460	307920	353140	442440	293850	329600	28721	184200	289660	107810	54846	752270	149270	514390	577090	263420	140640	293430	1136800	1479400	684960	4769100	4605600	1835700	2550600	3025200	3052800	439680	241200	340550	399830	217120	4	3	3	3	4	2	3
SLIV_27875	D6EKF1	31.467	X	Secreted protein (Sec) - Putative phosphodiesterase (IPR017946)	10687000	12359000	13126000	21668000	24991000	42383000	44765000	35371000	37431000	93203000	16800000	35115000	9391900	88581000	56122000	32892000	32177000	96737000	14482000	110240000	86445000	41115000	38091000	52001000	182710000	208440000	90446000	135150000	70221000	49707000	29670000	55396000	48317000	44706000	23627000	44403000	58532000	38827000	16	15	17	21	19	25	26
SLIV_27890	D6EKF4	20.575	F1	Export associated protein	0	0	0	8258.8	5360.3	1313	0	0	0	0	0	0	0	0	0	0	12304	31784	0	0	0	28635	18913	10184	93741	143950	0	2814600	2058900	1097400	322080	821260	1136500	77984	0	0	0	0	0	0	0	1	1	1	0
SLIV_27975	D6EKH0	106.75	X	Secreted protein (Sec) - Zinc-binding carboxypeptidase	0	0	0	0	0	0	0	0	17236	36469	0	26839	0	34954	17693	20218	13325	30879	0	37984	0	0	13993	0	63398	0	19455	674850	563070	290030	183300	452020	380700	0	0	17751	25739	0	0	0	0	0	0	0	0
SLIV_27980	D6EKH1	36.268	F1	Glyceraldehyde-3-phosphate dehydrogenase (EC 1.2.1.12)	287660	286670	140040	248190	286480	277690	373160	892900	719710	416670	215340	640900	123150	661620	656560	56338	253970	1510500	507540	681820	405540	30768	191720	540870	2748600	2002200	783260	11275000	5172100	4745600	1700800	4123700	4778700	263510	304280	292190	258430	262580	8	8	7	7	6	8	8
SLIV_27985	D6EKH2	41.721	F1	Phosphoglycerate kinase (EC 2.7.2.3)	22113	110870	58128	177160	84918	87436	304370	265060	356900	297840	98863	222440	87458	316760	448340	138890	415350	1150000	633360	724710	882390	169280	613120	916580	2777100	3491500	1346500	11841000	7612100	5860100	2758000	4264300	5218100	162480	145220	79722	53137	329130	2	5	4	7	5	4	7
SLIV_27990	D6EKH3	27.736	F1	Triosephosphate isomerase (TIM) (TPI) (EC 5.3.1.1) (Triose-phosphate isomerase)	166410	193630	205580	437580	417260	905150	857040	612330	602370	747700	281080	718980	147400	694360	1754700	893730	1048400	3685000	961560	3305900	4382500	1289100	1375900	2934600	10122000	10348000	5420400	45605000	21368000	14799000	7827800	14064000	21501000	1172600	714970	1319500	1713700	1066900	7	5	6	8	7	9	9
SLIV_28020	D6EKH9	27.21	A	6-phosphogluconolactonase (EC 3.1.1.31)	0	0	0	0	0	0	3122.3	0	0	0	0	0	0	0	0	0	4833.7	16680	0	11288	0	2715.8	0	11239	27145	22008	14275	86124	0	40962	18254	14827	29355	0	3291	0	0	0	0	0	0	0	0	0	1
SLIV_28035	D6EKI2	40.587	A	Transaldolase (EC 2.2.1.2)	440440	384870	331390	739840	683130	644670	685670	1097000	1709900	1814800	656830	1629800	265530	1428500	1222100	610670	454840	4026100	1174100	2426600	2637100	490850	1059400	1585100	6156900	8634100	3235600	16179000	8021600	6043100	2552600	4962800	7321800	1039800	622260	455010	1052400	1369000	8	7	7	9	6	8	8
SLIV_28040	D6EKI3	74.96	F1	Transketolase (EC 2.2.1.1)	61464	19973	41084	50877	79581	113190	102900	601620	582510	303590	68459	361260	34182	278480	174550	154990	55323	257380	108180	188760	453680	36294	98551	115530	587500	764900	332090	1454400	916940	658020	379310	427690	596790	132470	34329	37683	75571	58872	4	3	3	3	3	5	4
SLIV_28105	D6EKJ7	27.651	A	Vegetative protein	0	0	0	0	0	0	33330	29863	41192	43073	25036	99092	0	40247	37031	45177	25691	57590	19114	67975	67398	71522	53112	38819	33441	112600	89264	449000	444510	249390	40468	37753	114120	0	0	0	0	0	0	0	0	0	0	0	3
SLIV_28110	D6EKJ8	45.902	F1	Cysteine desulfurase (EC 2.8.1.7)	95917	13447	0	0	0	0	0	20222	36885	0	18146	57181	13087	32173	14489	0	0	83400	25410	21360	10208	3182.2	0	20735	119660	114030	24764	541370	467160	348250	49819	272840	411590	29199	13030	8164.3	0	63008	1	1	0	0	0	0	0
SLIV_28115	D6EKJ9	17.063	F1	NifU family SUF system FeS assembly protein (Uncharacterized protein)	0	0	0	75903	0	140230	0	0	80445	0	0	0	0	146450	200060	153000	148440	368510	0	326300	350880	174180	136330	286910	802210	770650	377080	0	457180	0	0	0	0	0	0	0	0	0	0	0	0	1	0	1	0
SLIV_28120	D6EKK0	12.084	A	Domain of unknown function DUF59 (IPR002744)	0	0	0	0	0	0	0	0	0	0	0	424310	0	353040	0	0	0	0	231710	0	0	0	0	0	0	778520	329430	1289800	0	664440	545830	922340	994440	0	0	0	329510	0	0	0	0	0	0	0	0
SLIV_07105	D6EKK7	29.635	A	Hydroxypyruvate isomerase (EC 5.3.1.22)	0	0	1173.9	0	0	0	0	10999	0	0	0	0	11554	32817	2989.5	0	0	0	0	0	0	2625.5	0	0	0	0	0	23963	28714	14108	5994.2	21821	17958	0	6809.8	0	0	0	0	0	1	0	0	0	0
SLIV_07110	D6EKK8	30.221	A	2-hydroxy-3-oxopropionate reductase (EC 1.1.1.60)	0	0	0	0	0	0	0	0	0	0	0	0	0	0	0	0	0	0	0	0	0	0	0	0	0	0	0	0	0	0	0	0	0	0	0	111450	0	0	0	0	0	0	0	0	0
SLIV_07115	D6EKK9	53.91	A	Catalase (EC 1.11.1.6)	22676	13621	16013	23981	74380	63826	100530	27795	33583	43117	17396	0	22463	23272	0	10763	0	4433.8	0	0	0	0	0	0	0	0	0	0	0	0	0	0	0	0	6866.4	0	0	0	1	1	1	1	1	1	1
SLIV_07130	D6EKL0	63.759	A	Glyoxylate carboligase (EC 4.1.1.47)	0	0	0	0	0	0	0	0	0	0	0	0	0	0	0	0	0	0	0	0	0	0	0	0	0	0	0	0	0	0	0	0	0	0	0	0	15607	0	0	0	0	0	0	0	0
SLIV_07145	D6EKL3	116.73	X	Secreted protein (TAT) - Protein of unknown function DUF312 (IPR005506)	10151000	8764200	8869600	15113000	17063000	20655000	21260000	26014000	31556000	39313000	14992000	31932000	12762000	43807000	4453600	2951200	2407800	12231000	5689300	14882000	8885100	4252600	4090200	7447500	19259000	26416000	9074700	41000000	20337000	12868000	8529900	16643000	19784000	5227900	3028300	3670300	5258100	4692100	55	52	52	57	56	71	75
SLIV_07255	D6EKN4	31.531	X	Secreted protein (Sec) - Secreted Endonuclease/exonuclease/phosphatase (IPR005135) with PGAP2-interacting domain (IPR027317) - Cell wall related protein	2036000	1926400	1409300	3900700	4230700	4436600	4401900	5197300	6260700	7814000	1749000	3028300	569560	7192600	4906700	2909300	2166500	8303600	1471300	9553100	7903500	5209900	3161000	4703100	14461000	17450000	7105700	11172000	8107300	3962000	483530	1931800	5351000	411120	272530	477750	239370	192050	7	10	9	13	11	10	11
SLIV_07480	D6EKS6	46.824	X	Secreted protein (Sec) - Carboxypeptidase	110750	176840	91310	212040	212230	477680	494640	408940	443610	1105400	167960	370330	18798	1212100	234610	232770	151490	943070	180910	1079100	260150	120470	206050	255280	1377500	1502400	478430	0	0	0	0	0	0	200920	315440	66668	120580	248410	4	5	4	6	5	8	8
SLIV_07595	D6EKU8	56.681	X	Secreted protein (Sec) - Esterase	3638700	4227600	3760400	7712500	8489500	12563000	12544000	14446000	10094000	17073000	5343100	13904000	2648300	26173000	12442000	8335400	5970700	24604000	3079100	23356000	19560000	11336000	8278100	12639000	43356000	44153000	18550000	49734000	24337000	16587000	8399100	16875000	17938000	12744000	8478400	10244000	14610000	8921300	21	20	18	22	20	24	30
SLIV_07615	D6EKV2	46.246	X	Secreted protein (Sec) - Unknown function	427290	427920	277990	723200	925270	973870	1058000	714880	1158200	998040	593330	992000	160630	925180	383580	311650	132060	1140700	376900	1266800	351320	295290	184400	264330	1196200	1026100	514710	617380	606590	306660	92597	75022	80004	364720	309770	179650	361600	212500	7	8	7	9	9	10	9
SLIV_07660	D6EKW0	38.456	E	Secreted Lipoprotein (Sec) - Aliphatic sulfonates-binding protein (IPR010067)	350930	357390	363190	585430	688470	701810	344730	861970	897320	1451400	743100	1435300	645880	1180800	635610	85942	71878	1184200	807520	1308700	412460	586620	79321	231090	1870300	2005000	893410	3618100	2041200	962610	825020	1736300	1905900	8453800	2478900	6654200	8208600	6507900	9	11	7	9	10	8	8
SLIV_17725	D6EKY8	35.02	B	Integral membrane protein - Transglycosylase	158230	131350	130130	226100	227040	281070	197790	152650	183220	566650	0	70877	0	165190	333300	279850	284470	828050	9179.3	935720	562010	302840	370920	498020	1257100	872150	775270	1546600	1149300	736410	157500	333950	729850	114430	188580	109660	155800	95990	2	2	2	2	2	2	1
SLIV_17860	D6EL15	35.436	X	Secreted protein (Sec) - Cell wall peptidase	1552400	956950	1161200	2282800	3097600	2324700	3264900	4750700	5203000	4025200	3695100	7014200	3633300	5352700	680880	331650	77223	3404400	2210000	3002200	899960	453050	388490	1082500	4057300	8445800	1879200	6990800	3845500	2234000	625110	1260100	1768400	2666400	1429000	1814000	2586300	2929400	8	6	7	8	9	9	8
SLIV_17970	D6EL32	7.5456	N	Transcriptional regulator MerR family	599850	803400	574630	312250	825990	850150	1112000	1141800	2054800	1540800	1229300	3401200	992650	1029300	426910	175390	133550	534310	197360	336530	0	0	0	0	981300	289410	306330	0	0	0	0	0	0	0	0	0	0	0	1	1	1	1	1	1	1
SLIV_17980	D6EL34	38.339	A	Valine dehydrogenase (EC 1.4.1.23)	0	0	0	0	0	0	0	0	0	0	0	0	5375.1	15359	53109	32976	33972	125540	29508	44593	94696	33265	28834	106490	378650	352230	175270	6003600	3223200	2459400	870490	1390700	2885700	53423	43007	64187	12883	134580	0	0	0	0	0	0	0
SLIV_18000	D6EL38	28.544	E	Secreted Lipoprotein (Sec) - Unknown function (DUF306 domain)	23164	1084.8	13879	35472	36622	46215	77556	72915	75410	81194	38243	101000	45880	102120	36622	22295	518.85	68845	20131	110360	47822	65787	16483	20269	49855	82029	68178	74545	104870	44434	5827.2	19780	47481	40695	19523	17438	76008	75028	2	1	2	2	2	2	2
SLIV_18040	D6EL46	9.774	A	Phosphoribosylformylglycinamidine synthase subunit PurS (FGAM synthase) (EC 6.3.5.3) (Formylglycinamide ribonucleotide amidotransferase subunit III) (Phosphoribosylformylglycinamidine synthase subunit III)	851370	1100700	1039200	1508000	1967100	2402700	2448800	495270	2220500	900560	154320	749580	33231	88892	1416900	872090	825640	3048000	1084700	2009000	2571400	1363500	468680	838450	4806200	4249000	2498900	5675200	5562200	3159800	2043100	926040	2251400	2662500	612380	736330	382130	728800	3	3	4	3	4	4	4
SLIV_18165	D6EL66	26.38	A	Siderophore-interacting protein	19349	30232	22916	20907	0	0	3641.8	136460	115060	183350	0	113180	0	115830	0	0	0	146950	58055	49765	2789.1	0	83468	71357	614530	540260	204130	8348700	5557200	2731400	728740	1252500	3268900	0	0	0	0	0	1	1	1	1	0	0	1
SLIV_18230	D6EL77	11.12	A	Stress response related protein (Uncharacterized protein)	0	0	0	18338	0	0	0	0	0	0	0	0	0	0	28435	0	24786	91953	36939	74893	0	21479	27861	50382	383700	258410	91259	2973100	1908200	1470300	598610	588890	748320	44453	0	0	0	0	0	0	0	1	0	0	0
SLIV_18345	D6ELA1	52.789	P	Secreted protein (Sec) - Penicillin binding protein	1356700	1046100	891130	1442300	1941200	1733400	2275400	2952700	3659400	3616400	1958300	4012300	991540	3433700	1038500	800070	521760	2362600	699300	1946100	910190	803220	464060	842190	2805100	1973300	1206500	570310	929100	420850	211480	117260	195950	1384400	1212200	756080	1148100	1049600	20	20	19	19	20	18	21
SLIV_28175	D6ELB1	64.696	X	Secreted protein (Sec) - Large protein with potential Endonuclease/exonuclease/phosphatase activity (IPR005135)	0	0	0	0	54735	58115	53388	0	8629.3	86867	0	116180	0	99067	32553	25181	13606	63522	35028	68771	42492	29788	20546	28161	122740	0	0	0	0	18929	6713.8	0	34106	135690	74362	110370	167530	106180	0	0	0	0	1	1	1
SLIV_28180	D6ELB2	49.947	A	Uncharacterized protein	0	0	0	0	0	0	0	0	0	0	0	0	0	34103	0	5849.7	0	0	0	0	0	0	0	5764.3	0	0	0	0	0	0	35558	0	0	0	0	0	98281	0	0	0	0	0	0	0	0
SLIV_28340	D6ELE5	51.162	P	Secreted protein (Sec) - Penicillin binding protein	1966500	1989700	2341200	3621900	4013500	5286500	4773400	5160800	5491700	8624500	5272300	9317600	2922400	8833800	3201400	1888100	1223100	7831600	3743900	7771600	4445000	2965200	1893200	2980900	10830000	13756000	5214800	2919400	1288000	659900	525810	1242300	1408500	489020	2292900	471330	758260	732540	18	15	18	20	18	21	21
SLIV_28365	D6ELF0	22.064	A	Uncharacterised conserved protein UCP022704 (IPR015987)	132310	192720	215380	323730	259690	437910	368740	356260	429390	472400	269480	389900	0	382250	9466.8	0	11474	413400	0	20128	26219	103250	0	31169	528860	481330	171650	938760	4253700	109040	89970	2665300	3645300	1556200	10452	1037900	0	12282	2	2	1	1	1	2	1
SLIV_28380	D6ELF3	32.865	A	Ectoine hydroxylase (EC 1.17.-.-)	63654	27334	38208	44936	144390	137260	134830	135000	258590	112040	163040	212000	46299	107960	145830	64146	7599.7	296200	251950	359430	275220	130250	32107	112810	515440	776840	245620	125530	163700	79512	74312	0	71499	100740	102200	82413	177700	0	1	1	1	1	2	2	2
SLIV_28385	D6ELF4	14.988	A	L-ectoine synthase (EC 4.2.1.108) (N-acetyldiaminobutyrate dehydratase)	353810	55935	43988	95956	287970	152410	99487	639350	538330	794510	0	170910	0	695900	1258800	804420	476000	5445200	301990	3898900	2575600	1759600	321980	1388900	8746200	2769700	3909900	17474000	10935000	4351900	2398300	7091900	11279000	23895	23111	0	0	0	3	1	1	1	3	3	2
SLIV_28395	D6ELF6	18.534	A	L-2,4-diaminobutyric acid acetyltransferase (EC 2.3.1.178)	48412	51610	26179	34670	60062	235800	271400	60436	75799	135050	154640	204340	68667	144260	185150	161350	109170	959080	526580	740520	470980	147630	146740	268420	1394500	872930	282260	2443300	0	530600	550680	1097700	907710	0	0	0	0	0	2	3	2	1	3	2	3
SLIV_28425	D6ELG1	33.268	A	Metal binding protein	0	0	0	0	0	0	0	0	0	0	0	0	0	0	0	0	0	0	0	0	13562	0	0	9370.5	66105	68730	23724	203920	103720	79717	20233	49250	100180	0	0	0	0	0	0	0	0	0	0	0	0
SLIV_28470	D6ELH1	130.95	A	Aerobic cobaltochelatase subunit CobN (EC 6.6.1.2)	4218.9	0	1648.3	2371.7	0	3024.4	5364.6	21161	17119	6020	6114.3	0	0	9856.7	30962	7514.9	21664	48786	44007	11424	48720	13211	21146	26348	251460	207000	191460	739970	207460	336800	176520	321320	350310	9948.7	3172.9	4976.4	28905	9523	1	0	1	1	0	1	2
SLIV_28645	D6ELK8	24.832	F1	3-oxoacyl-[acyl-carrier-protein] reductase FabG (EC 1.1.1.100)	215300	135660	54834	86652	120390	124740	57638	0	136210	0	51610	0	28915	0	212140	32200	137410	272210	51485	144230	132580	54582	33537	270640	901400	60943	213640	1636700	1099900	783670	518600	264000	641780	0	136620	93963	77352	129870	3	3	2	2	2	3	2
SLIV_28650	D6ELK9	27.153	F1	Enoyl-[acyl-carrier-protein] reductase [NADH] (EC 1.3.1.9)	18680	10988	0	12190	12588	0	24231	56988	86225	89070	0	56936	0	70260	39252	0	0	41224	0	0	0	0	0	0	114600	60275	0	810700	1426900	709840	299450	330660	279130	0	60330	0	0	0	1	1	0	1	1	0	1
SLIV_28750	D6ELM8	19.158	A	UPFUPF0098-like protein	37481	0	204520	287120	297240	336820	324730	256690	382260	313080	249410	600750	137480	474810	58248	464530	432520	1253300	653670	874190	734380	0	411340	494390	2180000	2032100	1121000	2044300	1672600	749200	166250	448130	1062200	0	71187	0	0	0	1	0	2	2	2	1	1
SLIV_28755	D6ELM9	28.458	X	Secreted protein (Sec) - Sporulation stage 0, protein M (IPR009776)	17914	13996	14755	19528	17831	20190	30427	0	20427	0	19703	22030	11614	30973	122940	59592	45795	234670	77844	143210	149370	54642	53656	78382	365970	250070	168140	2075600	508770	641270	180680	321150	481420	0	84503	0	0	0	1	1	1	1	1	1	1
SLIV_07790	D6ELN7	34.297	X	Secreted protein (Sec) - Solute-binding protein	8294.2	17900	0	11743	0	52408	35115	0	0	27064	0	0	59254	45684	0	0	0	0	65266	88388	0	0	0	36119	73106	125830	78762	0	0	0	0	0	0	5632	0	0	0	0	1	1	0	1	0	1	1
SLIV_07815	D6ELP2	33.681	E	Secreted Lipoprotein (Sec) - ABC-type glycine betaine transport system, substrate-binding protein	7941.3	0	2997.6	5781.3	0	10831	21084	20098	27715	47383	0	0	0	23350	34383	20582	12750	0	10795	27689	5678.5	0	63386	122960	350930	204850	153490	1158200	677840	483720	259600	510680	579230	31511	103830	73159	0	39968	1	0	1	1	0	1	1
SLIV_07930	D6ELR5	28.131	A	Putative heme-dependent peroxidase/Chlorite dismutase (IPR010644)	3310	6990.8	0	33256	24850	51752	57181	17144	0	0	30694	0	0	0	71654	53298	68465	142690	0	100550	200740	43860	69396	102030	423490	267530	158480	540340	510590	366900	174350	195410	352970	47953	26913	56055	51674	17681	1	1	0	2	1	1	2
SLIV_07935	D6ELR6	50.671	A	Protoporphyrinogen oxidase	34387	11056	24986	41363	63421	335710	75878	207270	62616	1222600	428160	71008	33938	60586	157090	76630	0	320830	215310	300080	480010	41752	128660	228590	703970	144810	445570	589020	3928800	914960	100610	1511600	1365600	0	5675.6	4936.9	0	0	1	1	1	1	1	1	1
SLIV_08045	D6ELT9	39.279	B	Integral membrane protein - Protein of unknown function containing cell envelope-related transcriptional attenuator domain (IPR004474)	0	37302	10884	24405	283390	22308	26676	0	31600	37802	0	52192	24151	47995	320710	126090	64430	486230	0	684400	533080	0	134150	202260	703390	19705	0	0	0	0	1181000	3192200	19617	6035.2	0	0	15102	0	2	3	3	3	4	3	3
SLIV_08095	D6ELV0	40.96	N	Transcriptional repressor protein ROK family	42490	4191.2	52077	144470	664950	1101600	1007700	58626	548960	562020	431580	78206	435080	9806.8	2308.3	454.18	0	5080.6	1168.5	0	2150.5	639.9	343.32	0	0	925.14	0	3681700	1243900	573040	12417	2167800	3886400	15878000	3528200	12801000	23608000	272050	1	1	1	1	1	1	1
SLIV_08115	D6ELV4	138.14	X	Secreted protein (Sec) - Alpha-1,2-mannosidase, putative	8970.4	12250	18730	35894	33583	41011	43895	20106	23006	54959	3501.1	3452	3938.3	41899	14438	4827.1	1758.9	20931	0	27232	31795	12150	6327.5	10829	38671	129900	16681	13031	4336.8	3019.9	0	3674.8	62790	19181	0	0	12953	7930.2	2	2	3	3	2	3	2
SLIV_08140	D6ELV9	97.379	A	Aconitate hydratase (Aconitase) (EC 4.2.1.3)	11779	14390	8170.1	18322	18272	22346	15544	61128	73823	116820	0	0	3743.5	93361	216270	119320	141990	456950	73411	266780	429170	45706	203330	290360	715960	1099200	436580	2521700	785960	1113500	465770	569710	981450	33085	51833	39661	104490	31437	2	4	4	3	2	2	2
SLIV_18450	D6EM34	34.518	A	Protein of unknown function containing NTF2-like domain and SEC-C motif	23288	0	0	0	0	19636	0	48500	56777	0	0	82834	25407	35326	190140	14409	30419	112980	153910	45337	190750	111060	125760	105970	463460	46849	190920	2523900	2814300	958520	729680	1124000	1452000	0	0	0	0	0	1	0	0	0	0	1	0
SLIV_18470	D6EM38	54.047	A	Xaa-Pro aminopeptidase 1 (EC 3.4.11.9)	38126	98282	55365	117770	100580	116280	165220	60497	104760	122000	60969	208830	43055	158180	159760	143160	334920	742820	116080	547280	666330	105220	435560	562020	1763900	1480100	916110	3637400	2151000	1242600	705180	1317300	1908100	38466	37790	261190	227320	133330	4	6	5	6	5	4	6
SLIV_18485	D6EM42	25.842	B	Integral membrane protein - GLE1-like protein (IPR012533)	32704000	25876000	28288000	55070000	53056000	71698000	70329000	109000000	114790000	141300000	111460000	169160000	50774000	157570000	48715000	22182000	9446200	87523000	54005000	73371000	97882000	53443000	30915000	41324000	156240000	242430000	113270000	45158000	23239000	13484000	6640800	21072000	22291000	132670000	102090000	105250000	192520000	142990000	13	12	12	13	13	13	13
SLIV_18490	D6EM43	23.148	E	Secreted Lipoprotein (Sec) - Putative Copper chaperone SCO1/SenC (IPR003782)	3407300	3158000	3735900	5896300	5910900	9215800	11244000	8534600	14321000	30720000	10599000	18280000	1742400	18584000	5064900	3676700	1824100	17339000	5743400	16953000	14855000	7221600	6370200	8162000	26885000	43894000	17092000	36556000	16708000	15006000	8515600	20865000	23896000	27958000	14758000	18448000	29263000	26992000	7	9	9	9	8	12	12
SLIV_18495	D6EM44	16.69	E	Secreted Lipoprotein (Sec) - DR1885-like metal-binding protein (IPR007410)	52881	118810	0	273150	391470	343770	471770	400200	372050	436080	415580	762160	515520	547620	0	43480	0	87139	82842	78390	65785	0	51544	28704	143960	227870	120530	412640	0	139310	168010	165720	84477	734310	516400	472010	654400	371930	1	2	0	2	2	2	2
SLIV_18625	D6EM69	67.071	A	Phosphomethylpyrimidine synthase (EC 4.1.99.17) (Hydroxymethylpyrimidine phosphate synthase) (Thiamine biosynthesis protein ThiC)	0	0	0	3615.1	0	0	8224.6	0	0	0	0	0	0	0	35218	25939	26964	127980	0	92626	105960	41123	57714	84507	241770	304120	138920	1205100	509050	617940	273090	625890	594960	0	0	4247.2	0	0	0	0	0	1	0	0	1
SLIV_18720	D6EM88	15.968	r	50S ribosomal protein L9	140570	150200	118720	238590	307480	341620	373700	222290	378330	400650	212330	390550	142310	151770	70215	5548.4	16528	172560	116270	93963	0	0	13823	59826	131460	257660	43460	1399800	669120	261160	314810	823470	455760	246780	238330	247460	446710	493570	2	3	3	4	3	3	3
SLIV_18735	D6EM91	11.177	r	30S ribosomal protein S6	0	0	0	0	0	0	0	0	0	0	0	0	0	0	0	173310	0	0	0	0	0	0	0	0	0	0	0	2451300	3179000	1464900	237020	0	0	9739.3	0	0	0	0	0	0	0	0	0	0	0
SLIV_18770	D6EM98	39.229	A	Inositol 1-phosphate synthase (Uncharacterized protein)	30531	27373	32112	65915	31758	23529	0	54296	38748	0	0	110370	0	0	237060	18858	13259	70365	115860	323220	340190	160210	119430	173770	889840	1125600	576130	542670	318880	248460	311660	171470	262750	40050	23780	0	0	35770	2	2	3	3	1	1	0
SLIV_18815	D6EMA7	34.228	A	Thioredoxin reductase A	7548.9	0	0	14215	0	0	0	0	0	0	0	0	0	60289	39436	29491	31665	93362	0	0	120720	0	21923	0	159920	0	68825	0	0	0	0	0	0	0	0	0	0	19634	1	0	0	1	0	0	0
SLIV_18820	D6EMA8	11.891	F1	Thioredoxin-1	338330	358050	386910	526100	695160	3298400	2993700	1814200	1694500	7058800	539650	2473900	615440	5066200	300410	379500	104940	1888900	547700	1580800	1116700	660480	899450	322530	2989400	3757200	867610	18280000	14061000	12267000	4489800	8646400	10229000	1307200	761590	664950	1894000	1460500	3	2	3	4	3	5	5
SLIV_18870	D6EMC0	39.956	A	DNA polymerase III subunit beta (EC 2.7.7.7)	0	0	0	0	0	0	0	0	0	0	0	0	0	0	0	0	1253.6	0	0	0	0	0	0	0	5382.7	13603	14032	1045200	505310	386020	59372	129240	368060	0	0	0	0	0	0	0	0	0	0	0	0
SLIV_18875	D6EMC1	31.471	F1	6-phosphogluconate dehydrogenase	53750	94809	40699	94720	59760	33660	75612	195840	269550	163890	37875	113550	0	257630	179730	127860	160270	842610	25172	460870	359720	134590	324850	422150	1320100	1810400	765230	3282900	1588300	1818300	563230	1250500	1805900	926600	145810	703310	805460	422660	3	2	2	3	1	2	2
SLIV_28795	D6EMF1	35.082	A	Hydrolase	0	0	0	0	0	0	0	0	0	53141	0	0	0	0	17638	0	20571	92444	14245	112470	167120	0	32437	39230	175180	209640	0	1207500	706170	388470	241370	423640	441810	0	0	19272	0	0	0	0	0	0	0	0	0
SLIV_28865	D6EMG7	23.197	A	ADP-ribose pyrophosphatase (Uncharacterized protein)	37029	60584	44024	68963	78820	87743	76478	151030	144240	92170	75589	325250	91651	81388	251000	94430	111150	364340	189000	315860	508820	197150	262290	200440	966380	891260	544430	1947200	1014200	818760	482050	1086200	1377200	0	97138	73784	162300	103970	2	2	2	2	3	1	1
SLIV_29120	D6EML8	27.393	X	Secreted protein (Sec) - Lipase 1 (EC 3.1.1.3)	39861	25623	30706	0	0	46706	63963	78291	88291	0	48408	0	0	0	60926	34899	18963	0	0	0	40048	11794	0	0	0	0	106900	31917000	24458000	12045000	333630	1090900	9099100	0	0	0	39181	0	1	1	1	0	0	1	1
SLIV_29365	D6EMR6	47.879	A	M20/M25/M40 family peptidase (Uncharacterized protein)	17612	14904	9939.1	18468	19546	30323	23768	0	0	0	0	0	6222.5	10845	99014	64959	65822	169550	31642	81639	129510	40378	78265	66760	307190	266430	169980	746480	121270	331300	39384	339360	435400	0	0	14688	0	11832	1	1	1	1	1	1	1
SLIV_29415	D6EMS6	24.438	A	Phosphatase	0	0	4005.7	0	0	0	0	0	0	0	0	0	0	0	15522	6177.7	6527.2	16102	0	0	19288	0	13282	5882	56490	53677	29298	204060	81270	82958	45192	53096	100910	0	0	0	0	0	0	0	1	0	0	0	0
SLIV_29430	D6EMS9	44.185	A	L-cysteine:1D-myo-inositol 2-amino-2-deoxy-alpha-D-glucopyranoside ligase (L-Cys:GlcN-Ins ligase) (EC 6.3.1.13) (Mycothiol ligase)	54827	35402	44231	58952	56133	134440	63887	57450	102410	101050	44076	109940	21882	102780	219850	113920	87992	354120	135070	207010	346980	96175	115730	169910	757460	708800	310160	1268200	1200800	187250	311900	475250	564990	0	0	0	0	0	1	1	1	1	1	1	1
SLIV_08650	D6EMX7	28.633	X	Secreted protein (TAT) - Thioredoxin-like protein	17801	10215	0	16069	23867	115940	59985	126110	75307	99919	36815	108600	0	109240	131490	90368	19242	262930	14184	188530	258790	127140	101200	103420	670490	429390	223940	487350	543720	288430	125520	230990	387660	115740	98015	68750	141090	54390	2	1	0	1	2	3	2
SLIV_08660	D6EMX9	12.706	X	Secreted protein (Sec) - Unknown function	619680	130390	413740	195860	187940	0	211040	583560	1126400	606930	836920	1292000	81531	1840300	0	162050	32221	0	0	115000	0	0	0	0	0	0	0	0	0	0	0	0	0	0	660360	0	0	392250	2	1	2	1	1	0	1
SLIV_19030	D6EN68	71.459	B	Integral membrane protein - Putative serine/threonine-protein kinase (EC 2.7.11.1)	8849.2	2357.6	2544.8	0	0	0	0	25630	28237	22633	36993	47047	10409	36337	0	0	0	0	12088	0	63285	0	0	0	0	194460	74820	264220	0	0	0	154040	135890	0	0	0	0	0	1	1	1	0	0	0	0
SLIV_19035	D6EN69	52.633	P	Secreted protein (Sec) - Penicillin binding protein A	3114600	2266200	2171700	4412200	5521500	3210400	3817200	5126700	4968100	7428200	5739200	11133000	3174700	8427900	3004300	1433000	661400	5015000	1622600	4719500	2201900	2655900	1237500	1409000	4600000	6706200	3872400	1421700	1648500	454820	253390	628160	467050	2370000	2197000	1483500	2271800	2200200	14	14	12	15	15	15	15
SLIV_19045	D6EN71	56.123	B	Integral membrane protein - Protein phosphatase	66147	82550	46674	62327	81987	108410	116220	158800	253050	232820	133230	348070	85684	187370	0	48917	33191	117540	80264	140240	58932	25397	0	0	181680	155980	78289	169210	115430	132170	0	0	0	230640	175870	0	0	209790	1	1	1	1	1	1	1
SLIV_19050	D6EN72	18.67	B	Integral membrane protein containig phosphopeptide recognition domain	964780	899020	899020	1396300	1460600	1336000	1459900	1711400	2416500	1808400	1614000	3171200	607730	2655100	1302800	765070	501400	1801100	597500	1447600	2337900	1124600	864730	1081400	3368200	2951700	1514200	3371100	4015300	2029100	1117500	2496900	2780100	528300	398820	255620	253570	316880	3	3	3	3	3	3	3
SLIV_19055	D6EN73	30.823	A	Phosphopeptide related protein (Uncharacterized protein)	29445	32613	24609	33738	38912	51418	0	57538	83559	0	44306	91747	0	104770	51243	30058	22817	97801	8100.4	58611	138820	51103	59825	55950	281940	211290	95188	374240	201750	0	106130	180350	121310	0	10434	0	0	0	1	1	1	1	1	1	0
SLIV_19080	D6EN77	12.066	A	Rhodanese domain-containing protein (Uncharacterized protein)	590110	588730	667670	905290	993050	1130600	1323800	879750	1358400	1165300	1282200	1918100	1017100	1242100	841620	438270	259760	1289700	1308600	1454900	1465400	790320	462150	740720	3001600	2365500	1558700	1987600	0	975220	500220	1166100	1058500	800270	535530	484090	744630	572370	1	1	1	1	1	1	1
SLIV_19325	D6ENC8	66.029	F1	Aspartate-tRNA ligase (EC 6.1.1.12)	0	0	0	0	0	0	0	0	0	0	0	0	0	0	0	0	0	0	13040	0	0	0	0	0	23140	0	30983	264970	85530	47428	12249	39325	76705	0	0	0	0	0	0	0	0	0	0	0	0
SLIV_19340	D6END1	59.74	A	Methionine--tRNA ligase (EC 6.1.1.10) (Methionyl-tRNA synthetase)	20914	11312	6796.1	16814	14841	21950	16458	0	18005	7405.3	0	0	13026	24107	95486	52686	58206	219320	88302	153560	253690	40809	109170	161090	597370	817110	269590	2162200	662960	766700	336210	757690	859230	33714	61040	8850.5	9735.3	10536	3	2	2	2	1	1	1
SLIV_19470	D6ENF7	16.602	A	Tellurium resistance protein (Uncharacterized protein)	233070	297120	263760	185740	188400	873300	950320	409490	237390	1664100	424420	216120	66293	865430	186300	264720	207260	1688600	490800	1556300	706930	136090	555750	1041600	6135000	4020100	2390900	49010000	30964000	22359000	8944100	6484000	16077000	140470	102750	126820	109180	327300	2	3	3	3	2	6	5
SLIV_19565	D6ENH6	7.1898	A	Potential cold shock protein 2	3145500	4069600	2448100	4897100	5334000	5765700	6666100	11467000	13472000	13108000	8465400	17682000	4971600	17692000	2540300	1288500	701620	3576000	2863200	2042800	3398700	2355000	1827400	1526900	5544100	9881800	1634400	2943800	8047100	3840400	1574100	2356500	2102500	2532800	926070	1252600	1738400	1014000	5	6	5	6	6	6	6
SLIV_19650	D6ENJ1	7.1899	A	Potential cold shock protein 5	6289200	5814100	5270800	8952300	9523500	10054000	10653000	17398000	21450000	22435000	15149000	25150000	8464700	25222000	3683300	1902800	1371600	7428500	2841800	7224200	7090800	4855000	2971500	3878500	12075000	17923000	7038700	16479000	24175000	13416000	6597700	11097000	11208000	4813100	3141200	2507400	4071000	5405000	5	6	4	6	5	5	6
SLIV_29470	D6ENK2	57.716	E	Secreted Lipoprotein (Sec) - Oligopeptide binding protein	76218	101940	78189	160440	164810	159260	209350	441980	415390	429290	298200	705340	155110	535180	402440	218960	180970	416720	185830	516600	486160	222630	203960	222760	1052800	1079800	465200	1214700	851560	423350	204440	452590	520340	462230	234830	360540	484650	320990	4	4	4	4	4	2	4
SLIV_29495	D6ENK7	20.239	X	Secreted protein (Sec) - Unknown function	2009900	1963400	1831700	2935200	3223600	4073100	4065000	4383800	5378800	5769300	4852600	5474200	2208400	6478800	4287900	1846700	614240	4946000	2393900	6440400	8544800	4668600	1657900	3182200	12160000	9375700	5466500	9237400	7280100	4556800	1814500	6003000	4867900	2128600	2016900	2677000	3250400	1673300	6	6	5	5	5	6	4
SLIV_29545	D6ENL9	34.936	E	Secreted lipoprotein (TAT) - Peptidyl-prolyl cis-trans isomerase	226100	226380	166770	445320	495310	343560	236080	235380	849770	1030700	487320	1105600	403810	681620	535590	228610	61880	1696600	666590	1349800	1348200	699530	249860	586610	2916000	5070600	1548800	2770200	1712200	1144900	631700	1866300	2263100	1159300	279650	672080	1011600	958020	3	2	2	4	2	5	4
SLIV_29550	D6ENM0	13.016	A	Peptidyl-prolyl cis-trans isomerase - FKBP chaperone (EC 5.2.1.8)	684190	377870	279700	724280	805430	1640500	1224600	1287600	1702600	1982100	503310	1062200	0	1103600	1703900	820350	730440	3032000	0	2189400	2189300	1121600	906770	1022900	7789300	7310000	2923900	16235000	9284700	6608700	4303700	6445900	7055000	2404700	1037100	2064800	1891800	1125400	2	1	1	2	1	2	1
SLIV_29590	D6ENM8	58.611	B	Integral membrane protein - Histidine kinase-like protein	3349	1624.1	8707.1	8906.1	10566	40090	10210	8189.4	10317	0	0	15898	9034.9	12964	2145.1	1126.9	0	5347.7	6952.9	0	0	0	805.98	7964	5286	0	0	40987	397440	46432	106800	44911	31631	0	0	0	0	0	1	1	2	1	2	2	1
SLIV_29625	D6ENN5	31.483	A	Siderophore-interacting protein (Uncharacterized protein)	343400	53601	267990	374930	412610	227860	518200	616720	586600	346550	380550	818330	383160	704410	371250	144980	228080	802660	530140	344960	936400	409100	476190	695110	3089100	2571200	952370	16640000	13979000	5824000	1477900	1637600	5552900	0	39734	57290	358060	0	6	2	5	5	6	6	6
SLIV_29640	D6ENN8	95.086	B	Integral membrane protein - Glycine betaine transport system permease	127270	111200	124220	153720	154710	232130	372170	386090	520140	1144200	246550	484890	106360	557080	307910	140420	99327	1060000	407650	802970	526890	256660	192500	372770	2263400	2803400	712500	4923100	2104900	1249100	342280	1304900	1813600	321250	150190	324430	384130	549370	8	8	8	6	4	4	7
SLIV_29705	D6ENQ2	40.306	B	Integral membrane protein - T7SS peptidase S8A, mycosin-1, component of T7S export system	5468.1	0	0	18160	16205	33324	30992	0	0	96100	0	22487	0	51604	16149	21418	12659	24222	0	44094	4082.9	17363	0	14731	48174	31157	0	0	0	0	0	0	0	31436	20443	28142	52983	0	1	0	0	1	1	1	1
SLIV_29750	D6ENR1	40.72	F1	Phenylalanine--tRNA ligase alpha subunit (EC 6.1.1.20) (Phenylalanyl-tRNA synthetase alpha subunit)	0	15139	12004	0	28632	5305.7	21441	36248	29708	0	0	54174	0	0	0	0	0	0	13928	0	0	0	0	0	4025.5	132660	0	0	0	1817.9	4226.9	11476	0	0	0	0	14607	30206	0	1	2	0	1	1	1
SLIV_29755	D6ENR2	89.896	F1	Phenylalanine--tRNA ligase beta subunit (EC 6.1.1.20) (Phenylalanyl-tRNA synthetase beta subunit)	0	0	0	0	0	0	0	0	0	0	0	0	5355.4	0	12709	0	0	23314	26937	0	19033	0	0	0	54827	0	0	64008	39242	0	0	30543	43301	0	0	0	0	0	0	0	0	0	0	0	0
SLIV_29775	D6ENR6	45.783	X	Secreted protein (TAT) - Glycosyl hydrolase-like 10 (IPR003790) (UPFUPF0748-like protein)	342120	205100	352080	604290	683000	792140	627650	691800	710220	828050	446090	1155500	409050	1052600	849540	355590	218890	1477000	797880	1347700	1834700	764730	413160	653970	2554000	3449700	1197300	5219600	3322300	1709300	862270	2473400	3109900	966290	426920	748750	852930	461720	4	3	4	5	5	6	4
SLIV_29830	D6ENS7	39.51	A	Arginine biosynthesis bifunctional protein ArgJ	8446.5	11157	6386.4	15827	0	17977	21514	62774	45115	31127	16426	11080	771.44	24758	23516	11516	24225	100500	13159	34972	112250	20793	44866	50471	220670	268020	78285	1145700	625470	312310	181610	512340	526610	26331	8439.3	20096	20516	8377	2	3	2	3	0	1	2
SLIV_29940	D6ENU9	29.045	E	Secreted Lipoprotein (Sec) - NlpA family (IPR004872)	235220	331890	256140	526010	734480	482010	660030	501720	744290	813750	780550	917310	233740	918570	1735100	670940	378160	2912700	1624100	3560800	2090600	1365600	655750	1001000	2972600	5092900	1726100	4624200	2165700	1760000	1051300	2451500	2742800	14821000	8826000	8515000	12581000	9465300	5	6	6	7	6	4	5
SLIV_29985	D6ENV9	10.364	A	Transcription factor zinc-finger protein	0	0	0	0	0	0	0	0	0	0	0	0	0	0	75060	0	0	182720	153200	0	99885	0	0	63723	169370	0	0	2057900	1053200	797440	264940	851200	1145300	0	0	0	0	0	0	0	0	0	0	0	0
SLIV_09305	D6EP11	28.691	A	SuhB protein	0	0	0	6597.1	8551	0	0	28602	0	0	0	12935	0	0	13088	31903	23404	122190	0	0	131080	0	50230	66369	336490	366950	90288	2176700	1489800	1016800	571200	565820	359990	0	0	1578.3	0	0	0	0	0	1	1	0	0
SLIV_09310	D6EP12	40.621	F1	Ferrochelatase (EC 4.99.1.1) (Heme synthase) (Protoheme ferro-lyase)	7642.4	3969.5	1585.6	10803	10925	14478	0	11316	14557	55433	0	0	0	52165	80817	66424	74896	160000	0	91664	207840	38732	78204	148010	486380	319470	186320	1472600	992570	561380	333390	311170	575430	31418	32842	58680	23162	32743	1	1	1	1	1	1	0
SLIV_09325	D6EP15	28.555	B	Integral membrane protein of unknown function	0	0	0	0	0	0	0	0	0	0	0	240290	255030	0	235050	0	0	0	0	0	0	0	0	0	0	0	0	0	0	0	0	0	0	737660	0	468740	439570	0	0	0	0	0	0	0	0
SLIV_09340	D6EP18	28.301	A	Hydroxylase (Uncharacterized protein)	2385000	2464300	2146000	4538700	4169000	3831500	94118	0	0	0	0	0	0	0	2536200	20058	21009	4524800	85032	4755400	33169	12607	0	2329400	8485300	9695300	4530700	10064000	5028400	3522200	2141400	5899800	6684900	6718400	3983100	4580200	0	4404100	1	1	1	1	1	1	1
SLIV_09400	D6EP31	9.3906	A	Phosphocarrier protein HPr	4700200	2789900	2764800	3930300	4124800	13734000	9723400	12653000	15362000	17832000	7028800	25717000	10645000	23472000	3212400	2268500	2535400	16506000	8383500	14091000	12745000	4455100	3836100	6818200	25325000	23560000	10509000	73729000	62185000	44464000	23753000	41710000	30555000	10251000	3060800	5047700	10763000	6519600	2	1	1	3	1	6	5
SLIV_09410	D6EP33	26.215	X	Secreted protein (Sec) - Peptidase	4187600	4823000	2889500	5187000	5134000	4838900	5416000	17043000	16297000	12045000	7584300	22872000	4085200	18219000	2106100	1536500	0	4305900	2609400	2558500	2814900	3804700	1435900	1661900	5416800	8696800	5830000	142690	552280	142410	146980	302520	0	4103200	2208000	1138500	4362000	2576900	4	3	4	4	4	5	3
SLIV_09415	D6EP34	48.909	A	Protease	11623	10266	0	0	0	0	0	22838	25075	159410	38709	92217	7741.8	17956	68842	32893	22043	163590	15905	75061	60992	15064	21823	142020	619230	425520	128080	878650	468290	250810	113120	149180	333830	0	0	0	0	0	1	1	0	0	0	0	0
SLIV_09420	D6EP35	49.045	A	Zinc protease	0	0	0	0	0	6505.2	0	0	26296	0	0	0	0	16165	25624	20681	22301	40863	2235.8	0	32010	16050	21898	33466	147580	75738	55411	48730	173880	159370	44015	19977	29725	0	0	9282.9	31175	0	0	0	0	0	0	1	0
SLIV_09500	D6EP51	8.2723	A	Uncharacterized protein	0	41491	0	0	51284	193510	167700	132700	205840	0	0	213730	0	0	108550	99937	106870	178560	0	0	0	0	0	158770	366770	238880	146460	415570	927700	0	313310	0	0	306500	150530	181700	255170	0	0	1	0	0	1	1	1
SLIV_09505	D6EP52	29.071	X	Secreted protein (Sec) - Serine protease	0	0	8230	0	0	0	0	0	0	0	0	0	0	0	0	0	0	0	0	0	16076	0	0	0	0	0	0	0	0	0	0	0	0	0	0	56153	58580	65505	0	0	1	0	0	0	0
SLIV_09510	D6EP53	55.934	A	RNA polymerase sigma factor SigA (SCO5820 homologue)	55258	129190	137400	178760	346420	295540	364440	120970	395590	374580	270640	456080	76760	253530	42496	63693	26112	281170	159280	271760	229080	120450	83070	126610	391870	444620	277020	171580	295820	102570	32761	41474	60757	38146	0	31564	64630	94842	1	3	3	3	3	3	3
SLIV_09590	D6EP68	105.3	A	Vitamin B12-dependent ribonucleotide reductase (EC 1.17.4.1)	23211	0	0	0	0	0	0	37607	58973	0	55955	93236	60196	71370	4057.1	21367	615.47	10137	8585.6	0	69717	43308	1089.4	0	8085	15843	0	215940	567940	304620	128080	78768	99240	28286	0	0	0	9415.3	1	0	0	0	0	1	1
SLIV_09625	D6EP75	42.955	X	Secreted protein (Sec) - Peptidase S1, PA clan (IPR009003)	48512	78913	115200	183270	225130	403030	357210	204260	260040	167410	203570	364340	74611	437910	252340	289080	220540	790210	300350	1165200	551920	170270	380950	483800	1335100	2670600	811150	7983100	5241500	3908600	2234100	5374900	4627400	991350	444370	521920	716640	803330	4	5	4	4	5	6	5
SLIV_09630	D6EP76	42.152	X	Secreted protein (TAT) - Peptidase S1, PA clan (IPR009003)	144430	170550	77087	204780	196560	245110	234650	238790	295480	306550	269120	435680	32611	417270	263440	185760	179310	706050	438390	790560	681170	234490	343230	472050	1166100	1242100	648520	7723800	4304700	3444400	2189800	4267800	4237400	29033	131680	242940	323630	160660	4	2	3	3	4	6	4
SLIV_09735	D6EP98	29.555	X	Secreted protein (Sec) - glutamate binding protein	73834	66228	47134	84104	96063	101160	121640	286120	305860	382320	90751	212880	44736	79013	764200	400190	364010	1856400	302610	1683300	467870	696450	223120	841180	2955500	3397400	1461200	7479200	4300000	2997000	1572400	2465300	3749700	393340	831710	913830	1093300	730120	4	4	3	3	2	2	2
SLIV_19735	D6EPB5	27.23	X	Secreted protein (Sec) - Glycoside hydrolase/deacetylase	984090	1069900	1126000	1198600	1348400	2299100	2552300	2962600	4217100	6652600	2530300	4966900	1516600	4320800	2631700	1958200	1467300	11820000	4803500	10482000	4142300	1619000	2010700	3765800	22036000	25282000	9184100	47816000	26076000	17756000	9628300	20855000	23718000	2065700	1505800	3523700	3294100	4164100	10	10	10	11	9	12	13
SLIV_19760	D6EPC0	20.086	E	Secreted Lipoprotein (Sec) - Unknown function	179440	103410	403230	183850	169190	568340	254530	513440	1448400	1220000	548480	906100	507560	527490	983820	738360	636100	1279300	458180	767830	2229100	1184900	84069	1002400	3259800	1556800	1360100	14553000	13960000	9339200	5571600	8670800	7323300	1316300	928490	652420	2123300	381600	2	1	3	1	1	3	1
SLIV_19925	D6EPF3	43.889	X	Secreted protein (Sec) - Tachylectin 2 domain containing protein (IPR023294)	367830	356660	389900	454150	972400	1033700	792840	913830	897640	1188400	688420	1300400	666330	1542000	330760	200800	192820	2048800	798750	2137600	1267100	545510	406150	783850	1339800	3316800	946210	3984600	2114600	981780	871790	1683000	1915300	1286900	674590	832690	1040800	1232200	7	7	6	6	7	8	8
SLIV_19945	D6EPF7	66.27	F1	Chaperone protein DnaK (HSP70)	168950	86019	71293	129190	220210	80233	202970	214900	381460	240880	227650	520850	224240	360670	567180	241300	227120	1389200	899320	1030300	1196800	550190	407980	661130	3145300	3166800	1605600	18952000	10800000	8303600	3265600	7012500	8613000	282800	93449	48701	97293	118140	11	7	6	6	7	3	8
SLIV_19950	D6EPF8	23.874	F1	Protein GrpE (HSP-70 cofactor)	36499	51393	43509	39135	42554	172740	124880	78996	20868	88158	52073	93972	37764	27757	342160	95473	80619	439100	259980	135530	287280	67765	70976	317890	687670	1083800	761350	3647900	2384000	930220	381930	1272000	1529600	29009	0	0	41713	0	1	2	1	1	1	2	1
SLIV_19965	D6EPG1	39.726	E	Secreted Lipoprotein (Sec) - Solute binding lipoprotein	13437000	21731000	16880000	27406000	31066000	31486000	29997000	55184000	46222000	63158000	35779000	61700000	14581000	81371000	29401000	17914000	11292000	51406000	18703000	51480000	46003000	28927000	22658000	23144000	79474000	120180000	44985000	73417000	43879000	33002000	22288000	41786000	41035000	57926000	33295000	37731000	54766000	40576000	22	23	21	26	25	24	27
SLIV_19990	D6EPG7	94.437	F1	Chaperone protein ClpB	4608.4	0	0	0	0	26422	0	0	12091	28489	16752	0	3048.3	13609	8403.9	4471.8	0	17543	16522	17679	15333	0	3763.5	0	44846	45957	0	192080	139670	66988	61531	65016	53146	0	0	13274	5182.9	4468.6	2	0	0	0	0	1	0
SLIV_19995	D6EPG8	20.381	A	Putative sensory transduction regulator YbjN (IPR019660)	0	0	0	0	0	0	0	0	0	0	0	16653	9609.5	0	0	26469	37239	79393	0	67349	0	16962	29078	50068	235320	320950	131410	878960	333820	273470	153150	122760	220480	0	0	62047	0	0	0	0	0	0	0	0	0
SLIV_20035	D6EPH6	28.897	A	Aldose 1-/Glucose-6-phosphate 1-epimerase (IPR008183)	6582.5	0	0	0	0	0	0	251130	8723.5	353920	11227	13057	5019.1	0	38774	19268	21551	32553	7444.4	36112	48495	12216	22544	36074	65077	59063	41739	753610	62497	305120	98082	151920	419030	28976	36891	13392	44580	7404.7	1	0	0	0	0	0	0
SLIV_20045	D6EPH8	36.899	F1	Fructose-bisphosphate aldolase (EC 4.1.2.13)	57159	23392	19356	12914	6375.1	48127	41217	99904	198030	0	28142	161270	9547.7	133820	213790	72350	24888	336210	175880	275300	200180	65241	116060	267860	1101100	1751700	577190	6660500	2548700	2683400	806500	1892000	2800200	0	19538	39231	69767	113170	5	4	3	1	1	4	3
SLIV_20055	D6EPI0	14.871	A	Uncharacterized protein	244560	138560	167440	199950	287940	996470	927590	694540	1620700	1961300	577430	1416900	257090	748880	631490	582020	619700	1932300	954000	1687400	1760900	843530	545830	935570	4402600	3554200	1820300	3259500	2607700	1142400	565190	1075700	1526200	0	0	0	135140	0	3	4	4	4	4	4	5
SLIV_20155	D6EPK0	17.486	X	Secreted protein (Sec) - Unknown function DUF3515 (IPR021903)	137520	194920	96227	135430	0	221280	208980	285200	277780	0	0	0	63416	308290	399000	316990	302420	451350	274990	625960	486070	0	314450	262430	860730	910090	466880	527800	466700	0	0	263850	0	330820	386690	404390	194720	281440	1	1	1	1	0	1	1
SLIV_20200	D6EPK9	11.729	N	Nucleoid-associated protein SLIV_20200	0	74057	36411	141880	134020	131960	118410	450560	336550	540000	438540	398760	92166	358520	234890	75861	52066	218990	108520	209660	250170	150870	85848	133240	475940	599600	185740	0	577270	0	294190	0	0	0	0	0	0	0	0	1	1	1	1	1	1
SLIV_20220	D6EPL3	44.779	F1	Aspartokinase (EC 2.7.2.4)	31532	34599	27274	16494	14049	27603	15390	53776	32279	0	26032	25231	11844	61563	52179	30851	23255	82525	22580	46514	45439	12692	13550	21255	315610	157110	122740	1295100	860550	576060	244920	573210	515900	42391	10343	52276	40854	31753	3	2	2	2	1	2	1
SLIV_20245	D6EPL8	65.725	A	Peptide hydrolase	33692	15684	4152.7	40867	16526	64778	89658	98183	126180	296950	29250	61520	12562	51622	111170	49069	73473	228000	38608	170280	336610	119290	164780	74623	749800	360380	277700	1374900	1164800	879390	419530	937850	1037800	37133	49465	79815	28313	22429	4	2	1	3	2	4	4
SLIV_30120	D6EPP7	74.564	F1	Threonine--tRNA ligase (EC 6.1.1.3) (Threonyl-tRNA synthetase)	7198.3	8332.2	3730.6	5291.7	7064	0	0	0	16579	0	8240.5	0	0	15980	34389	11265	14956	19394	14924	0	0	15651	15580	15851	132610	68601	23045	40380	0	89846	40051	17311	86573	9416.9	17993	0	0	8137.6	1	1	1	1	1	0	0
SLIV_30160	D6EPQ5	32.201	A	Pyridoxal 5'-phosphate synthase subunit PdxS (PLP synthase subunit PdxS) (EC 4.3.3.6) (Pdx1)	74919	50733	44407	73462	98149	112120	117310	134500	0	0	0	0	0	0	182780	51997	0	226910	262200	257060	238220	142780	0	116910	301070	332920	216980	234590	179040	132270	0	153190	183420	56323	0	0	0	0	1	1	1	1	1	1	1
SLIV_30170	D6EPQ7	26.831	N	Probable transcriptional regulatory protein SLIV_30170	21536	11766	15730	27011	28185	43088	0	138370	106290	137100	31750	267320	39796	332400	151520	49157	36826	222000	103260	125590	307800	34312	84030	64702	624730	2067500	236450	2704200	1237000	793980	190330	630420	1321300	265290	17035	28134	31937	39973	1	1	1	1	1	1	0
SLIV_30220	D6EPR7	29.486	B	Integral membrane protein - Peptidyl-prolyl cis-trans isomerase (Putative PpiA homologue)	2584700	3303300	1813200	3823800	2970400	4363700	5407400	4903800	4818900	8213100	4534200	7718700	191180	7550700	5793600	3813500	3444800	7437200	7500300	9226800	10368000	5163400	4685700	5811900	14246000	16666000	9225600	10736000	6329300	4628700	2930200	5830200	6440100	11579000	7357400	9078800	14166000	9513000	6	6	7	7	6	4	7
SLIV_30275	D6EPS8	63.706	B	Integral membrane protein of unknown function - YceG-like protein	0	0	0	0	13311	34733	44085	28857	29380	83593	0	0	0	82973	43493	0	40515	74246	0	0	87350	41556	59493	69736	233940	298040	102600	213550	351450	238860	124210	0	0	27909	0	24178	0	34219	0	0	0	0	1	1	1
SLIV_30280	D6EPS9	28.985	A	Shikimate 5-dehydrogenase	0	0	0	0	0	0	0	0	0	0	0	0	0	0	10904	0	0	25608	0	0	0	0	0	0	46422	62853	23559	204670	112040	65016	35476	0	54881	0	0	0	0	0	0	0	0	0	0	0	0
SLIV_30315	D6EPT6	20.649	A	Elongation factor P (EF-P)	1649100	1188800	1451200	2084000	2149200	3184800	3147100	3183200	3302200	3782200	2533000	4196400	1777700	4172500	4504000	1746300	1793700	9396200	4855300	8111200	7039100	4513400	1972500	3713900	13566000	14748000	8890700	10511000	18109000	6698200	2016500	5235200	6256700	2019600	1366000	1911700	2482700	1520100	1	1	2	3	3	2	2
SLIV_30325	D6EPT8	18.178	A	DNA-binding protein	38700	38736	0	28552	40498	78710	66693	138920	428440	479260	224620	542150	205810	199320	148190	71229	29035	472770	386640	177180	315020	201500	84422	204460	848750	825830	294850	1180800	988580	411130	152070	275280	422850	129290	31863	158200	242380	153290	1	2	0	1	2	2	1
SLIV_30390	D6EPV1	43.46	F1	S-adenosylmethionine synthase (AdoMet synthase) (EC 2.5.1.6) (MAT) (Methionine adenosyltransferase)	0	0	0	0	0	0	0	0	0	0	0	0	0	0	21553	0	7385.8	28227	3279.3	19332	24207	11100	9123.2	0	67276	78823	23944	177300	63728	74870	33684	57859	24997	0	0	0	0	0	0	0	0	0	0	0	0
SLIV_30445	D6EPW2	24.308	A	Ribulose-phosphate 3-epimerase (EC 5.1.3.1)	0	0	0	0	0	0	0	0	0	0	0	0	0	0	93111	86738	75714	110180	45444	0	135640	54917	70712	71802	227140	0	157090	0	0	530120	0	0	441970	0	0	57250	0	0	0	0	0	0	0	0	0
SLIV_30550	D6EPY3	21.069	A	Riboflavin synthase (EC 2.5.1.9)	0	0	0	0	0	0	0	0	0	0	0	0	0	0	0	0	26729	165230	60823	185930	152310	68572	35920	73541	329060	222870	179270	1244700	606410	871420	355690	786290	686290	0	33622	0	0	0	0	0	0	0	0	0	0
SLIV_30575	D6EPY8	30.905	A	ATP phosphoribosyltransferase (ATP-PRT) (ATP-PRTase) (EC 2.4.2.17)	0	0	0	0	0	0	0	0	0	0	0	0	0	0	0	0	5053.7	0	0	0	0	0	0	0	22782	0	0	519230	58157	165310	26699	0	125410	0	0	24298	19481	0	0	0	0	0	0	0	0
SLIV_30660	D6EQ05	14.123	A	RNA polymerase-binding protein RbpA	53230	0	0	0	0	114310	0	0	0	0	0	0	0	0	0	0	0	0	0	74695	170000	25286	111990	26871	0	261460	67482	59135	0	0	9344.6	0	0	0	0	0	35641	0	1	0	0	0	0	1	0
SLIV_09860	D6EQ40	30.124	B	Integral membrane protein - Lambda repressor-like, DNA-binding domain (IPR010982)	566410	709240	688770	923990	1170100	1043100	1235100	1363400	2101200	1731300	1603200	2582000	1464700	2529300	284390	196940	13349	816440	618800	669210	252450	211710	3331	226490	849350	879340	656640	24044	0	0	0	0	0	6800.7	62877	0	11516	11227	3	3	3	2	3	2	3
SLIV_09915	D6EQ51	31.13	A	4-hydroxy-tetrahydrodipicolinate synthase (HTPA synthase) (EC 4.3.3.7)	0	19337	0	0	0	0	0	0	0	0	0	0	0	0	0	14821	16824	81821	54865	36177	0	0	0	32534	169800	124840	66014	474090	380320	235580	150240	195040	254750	0	12253	0	0	0	0	1	0	0	0	0	0
SLIV_09950	D6EQ58	79.359	A	Polyribonucleotide nucleotidyltransferase (EC 2.7.7.8) (Polynucleotide phosphorylase)	35134	26974	15522	25889	31545	32008	39310	4646.5	110740	80318	38772	109860	17382	65391	0	1991.2	2425.8	57924	18054	0	0	30509	32874	26373	97114	106010	67328	63448	341290	58085	161110	0	174600	0	8432.5	0	0	37536	1	2	1	1	1	1	1
SLIV_09960	D6EQ60	11.023	A	BldB	337330	113000	67175	86057	516680	97836	95178	408360	1725900	1265700	582120	605850	745440	1064800	434560	235320	277540	1490800	328610	1539300	1224000	747810	479930	985620	2562700	2595000	1637800	5917000	2963300	2848600	989390	1928100	2592800	374550	508630	155590	699740	200100	4	4	2	2	2	1	2
SLIV_09975	D6EQ63	10.928	X	Secreted protein - ESAT-6-like protein (T7SS EsxA protein)	17131000	24338000	13171000	18492000	26605000	22928000	27309000	58891000	82076000	55836000	42349000	91875000	17365000	94067000	18429000	15344000	10362000	19992000	22236000	15827000	12019000	9983800	6901900	4382900	42306000	48572000	19827000	21638000	9876800	6828900	4757900	5898100	5073600	4944000	14983000	2144800	6240500	6206800	3	3	3	4	3	7	7
SLIV_09980	D6EQ64	12.752	X	Secreted protein - T7SS ESAT-6-like protein (EsxA) (IPR010310)	9393700	11427000	9408300	10455000	9913200	23386000	25442000	32879000	36323000	38156000	20023000	38420000	13484000	41936000	7682700	10196000	7056600	29778000	7220500	27310000	11258000	6027100	3416600	8651100	46335000	22503000	15080000	12315000	16575000	6609000	5797600	3267100	3087400	3227800	8330000	5746700	8009800	6626600	8	10	11	11	10	13	13
SLIV_09985	D6EQ65	42.492	B	Integral membrane protein - Peptidase S8, subtilisin-related protein (IPR015500)	750630	789280	597170	901210	1348200	923660	1046100	2684200	2609300	2851300	2249800	4148900	1707400	2888600	581620	292670	166090	1460400	1044900	1213600	740780	431250	262320	422020	1511200	2927200	978010	17002000	149140	7293400	2567700	898710	861640	1756700	1409100	999000	1547500	1750000	3	3	2	3	3	3	3
SLIV_09990	D6EQ66	58.486	A	Uncharacterized protein	985480	822030	918890	1834600	2857900	2242600	2772700	3724500	3563200	3574000	1722400	3051900	445670	4923700	1758600	664750	137610	3910900	363120	4092900	2155700	1569000	516150	1329400	4444000	6393200	2711600	10285000	6968300	3809400	1516500	4463700	4573800	2298800	1534100	1528500	2496300	2392700	5	8	6	6	8	5	6
SLIV_10010	D6EQ70	83.196	A	AG2 protein	12075	30765	18826	50059	50839	54846	29735	10137	88139	130650	68136	102350	22027	124990	20811	15920	14447	106290	18974	96781	42028	22055	15883	50600	114340	229180	82136	366310	109610	91282	33724	154260	204030	84421	95969	97985	43903	226850	2	5	3	5	4	4	2
SLIV_10015	D6EQ71	21.84	E	Secreted Lipoprotein (Sec) - Lipoprotein of unknown function	222350	198810	173350	234400	334740	375030	428180	0	0	0	0	0	0	0	307230	228890	169640	836210	508110	748300	308090	266790	158730	318010	1069600	762860	492600	653880	1184800	536050	193440	0	309330	501820	405450	371050	524050	352860	1	1	1	1	1	1	1
SLIV_10030	D6EQ74	53.925	B	Integral membrane protein - T7SS EccB (IPR007795), component of T7S export system	544760	649890	729230	1121100	1254000	1625600	1810200	1313800	1645800	1164400	893110	2064500	678920	1505600	725040	490690	398610	2049600	288000	1756200	1247800	503480	450620	1000900	3216700	3552200	1334500	1056600	981230	403530	174020	410050	570380	1353300	619620	1098200	1207700	860730	8	7	9	9	7	10	11
SLIV_10110	D6EQ91	19.769	F1	Ribosome maturation factor RimP	0	0	0	0	0	0	0	0	0	0	0	0	0	0	0	0	111520	0	0	0	0	0	0	0	0	0	0	770030	1156200	468810	0	0	0	0	35876	0	0	0	0	0	0	0	0	0	0
SLIV_10130	D6EQ95	61.252	F1	Proline--tRNA ligase (EC 6.1.1.15) (Prolyl-tRNA synthetase)	0	0	0	0	0	0	0	0	0	0	0	81004	0	0	0	0	0	0	0	11565	0	0	0	0	0	4402.9	0	109400	150760	78917	30762	78378	270780	0	0	0	0	0	0	0	0	0	0	0	0
SLIV_10325	D6EQD3	40.932	X	Secreted protein (Sec) - Peptidase	1280800	1652400	1176600	2099000	3294700	2349700	2130400	3533900	5253700	3423900	2157100	6016600	1806800	5912200	1581100	696880	545540	2851600	1189000	2614500	2062600	770920	775900	1241800	3931200	4394000	1447900	20207000	13588000	7415600	1440400	3537200	9409500	430130	264710	463530	190730	227270	11	11	11	12	12	12	14
SLIV_20385	D6EQF7	16.488	A	Aspartyl/glutamyl-tRNA amidotransferase	843480	663370	746890	952420	1312600	1773100	1924700	1296300	2072300	2194700	1298000	2135700	1134800	1419300	529320	410760	188170	1588000	431040	1363900	1402100	501640	242800	685640	1632400	1013100	836700	2648200	4113300	1222300	866470	554580	977430	295180	80341	241550	297850	286720	7	6	6	6	5	6	6
SLIV_20390	D6EQF8	80.139	B	Integral membrane protein - Transpeptidase	432170	430930	407740	510260	590780	923130	1014000	1080400	1579400	1818200	773370	1745100	265420	1851800	388720	452760	377090	1441800	624640	1725000	739830	375880	307460	711800	2320100	2295100	894840	311960	237040	82355	37120	503770	527410	318910	521920	177110	304860	585010	14	15	13	14	13	11	14
SLIV_20410	D6EQG2	6.0919	A	Uncharacterized protein	0	0	0	189140	158020	1423800	602310	0	0	3629700	0	0	0	2143200	415190	162750	1107600	1450600	0	1679900	4491000	1464500	3067300	2031900	5539000	4959400	2235700	9323300	9440200	6082900	5855600	3402700	2086800	2026300	1211600	966440	2679000	0	0	0	0	1	1	1	1
SLIV_20415	D6EQG3	15.704	A	YjgF/YER057c/UK114 family (IPR006175)	0	0	0	0	0	0	0	0	254000	0	209770	144030	0	0	0	0	0	0	178980	0	0	0	0	0	0	703920	0	6013800	1242800	0	0	1530600	0	0	0	0	0	0	0	0	0	0	0	0	0
SLIV_20430	D6EQG6	29.41	A	Hydrolase	0	0	0	0	0	0	0	212280	306150	447870	0	0	0	436350	0	49963	0	0	0	0	0	0	0	0	0	0	0	0	0	0	0	0	0	0	0	0	0	0	0	0	0	0	0	0	0
SLIV_20435	D6EQG7	24.675	N	cAMP receptor protein	33589	3738.2	20921	21286	114340	84332	141230	41772	68773	35007	23332	46956	35912	0	0	25405	0	105810	74583	117200	0	0	0	10258	168790	0	0	3239400	1571600	1014900	87059	105290	2035800	470790	248720	416310	714080	493540	1	1	1	1	1	1	1
SLIV_20450	D6EQH0	42.732	B	Integral membrane protein - Peptidase S1C	512920	385810	481880	750820	714640	2056100	1838600	1637800	1835900	4758000	1374600	2602300	1079100	3921600	730180	703000	423300	1934000	695030	2028900	1854200	1009200	951070	1222600	3083600	2760400	1577600	438260	158890	140470	0	0	123800	1550300	1695300	1367800	2109100	1380900	3	2	2	5	3	7	6
SLIV_20555	D6EQJ1	19.769	E	Secreted Lipoprotein (Sec) - Unknown function	26491	1532.6	25503	38313	74349	66175	68258	44287	56727	57737	39691	101290	36357	61549	37288	10743	0	91916	0	114760	36800	0	0	12547	92715	75191	88712	812340	560180	438990	297360	462120	262180	84661	158550	214280	0	258020	2	1	2	1	2	2	2
SLIV_20575	D6EQJ5	117.68	B	Integral membrane protein - dTMP kinase	0	0	0	0	0	0	0	0	0	0	0	0	0	0	0	0	0	0	0	0	0	0	330.95	0	0	7007.5	0	0	21714	36722	27924	13055	0	0	0	0	0	1566	0	0	0	0	0	0	0
SLIV_20725	D6EQM6	18.694	A	Inorganic pyrophosphatase (EC 3.6.1.1) (Pyrophosphate phospho-hydrolase)	115890	13992	54126	165920	196770	287480	1629500	205790	279190	349090	79376	206310	77547	103940	955660	31854	8412.9	2167400	148560	1882400	1356000	840960	547520	1271200	2467100	3768900	2686500	9644000	5085700	2241200	534810	3757200	4641900	267310	80676	0	107570	0	2	2	2	2	3	2	3
SLIV_20790	D6EQN9	40.573	B	Integral membrane protein - Putative esterase (IPR000801)	39195	51724	16465	16492	26610	30888	24698	0	58291	0	36951	0	21490	83271	33927	43962	0	128750	17594	0	68187	31950	38015	54414	68815	39989	65383	0	166780	84334	0	34640	0	226640	154770	118820	260420	100240	1	1	1	1	1	1	1
SLIV_20905	D6EQR3	93.013	F1	Putative ATP-dependent Clp protease ATP-binding subunit	0	7050	4465.9	0	0	0	18286	9825.3	0	0	0	48845	8866.3	0	0	0	0	0	198.54	0	0	0	0	0	0	3180.7	0	47778	23294	39217	28159	0	0	0	0	0	2634.3	19670	0	1	1	0	0	0	1
SLIV_20985	D6EQS8	54.264	B	Integral membrane protein - Histidine kinase (EC 2.7.13.3)	0	310960	425330	7498.3	12656	11058	16690	0	0	0	0	0	0	0	0	235420	0	52978	0	0	13580	0	0	0	1910.3	0	852.31	0	0	0	0	0	0	405770	0	0	0	0	0	1	2	1	1	1	1
SLIV_20995	D6EQT0	23.335	E	Secreted Lipoprotein (Sec) - Lipoprotein CseA	410300	416040	263310	1020900	1177600	1206700	973190	1143000	1219100	358890	613730	1271800	139370	2632200	1665700	725530	760440	2674700	558970	3091100	3232800	1646400	1222100	1649100	4878500	6330000	2460100	3190600	2214700	2001100	1210400	1879700	1441400	2804200	1210700	2163600	3044600	1645400	5	2	3	4	4	4	4
SLIV_30780	D6EQU5	30.865	P	Secreted protein (Sec) - D-alanyl-D-alanine dipeptidase (D-Ala-D-Ala dipeptidase) (EC 3.4.13.22)	40774	70136	72976	67119	83749	9284.1	126060	105410	39619	42729	99434	0	36932	31305	103760	47451	25455	441590	110690	286830	237130	62586	75877	84878	522080	675110	339910	14623000	6392300	3523300	1583400	3072700	4554400	56793	35607	33525	25780	25246	2	1	3	2	1	1	3
SLIV_30810	D6EQV1	15.237	A	PTS system sugar phosphotransferase component IIA	714830	630570	599970	1076900	1077300	1477900	1338000	0	1214700	1633300	1154900	1896300	876400	1603500	1757500	885350	0	3609400	3184400	2656700	2139900	1706600	773610	1185700	5375700	4188100	2696900	15650000	11341000	7858500	3972100	13035000	12491000	0	505410	169260	207460	225200	1	1	1	1	2	1	1
SLIV_31270	D6ER48	14.5	A	co-factor binding (IPR003781. CoA-bd./IPR016040. NAD(P)-bd_dom)	52414	73842	80036	70546	72628	211930	139940	108010	198310	249700	136590	244340	42050	184610	0	0	0	0	83326	0	0	0	61446	0	0	261920	170580	0	0	697980	435320	788500	0	0	0	0	0	0	1	1	1	1	1	1	1
SLIV_00465	D6ERC7	20.662	A	Uncharacterized protein	12996	20169	32229	47244	33718	69683	96642	0	47621	20430	41535	0	41970	17546	30243	16563	4796.3	114790	77266	102690	164680	54131	48730	91487	224130	354410	72686	993200	215990	202190	120410	192080	793550	11475	0	0	63136	49032	1	2	2	2	1	2	2
SLIV_10415	D6ERF8	20.786	F1	Ribosome-recycling factor (RRF) (Ribosome-releasing factor)	641830	486120	492280	719040	922370	2379300	1898100	2134300	2673700	4938700	992990	2030700	60175	1403100	2856700	1845700	1456600	4866500	1075300	5242600	6001200	2767200	2371800	3199400	12700000	10455000	6528300	11801000	14104000	6167300	4242700	3755100	3472800	792950	449220	994650	786210	897440	8	7	10	10	8	11	13
SLIV_10425	D6ERG0	29.848	A	Elongation factor Ts (EF-Ts)	513600	412590	364870	811650	1038200	1656100	1820500	1465900	1884400	2828400	854280	1380100	411240	1703300	2305400	1109600	654160	6411200	2880600	5558600	4026600	2191300	1027000	3087400	11861000	14912000	5912100	13999000	10629000	4841600	2334000	2756600	4531500	1272700	907680	1546600	1808100	1633400	9	7	9	12	11	12	13
SLIV_10515	D6ERH8	15.224	r	30S ribosomal protein S16	315550	216440	154450	294120	366160	355120	369010	1374100	1895800	555150	306730	1745700	310450	1397500	175490	0	0	74664	0	80154	218450	127720	0	0	56024	229040	0	404330	1178900	852980	112610	164910	198850	1199600	290650	565150	545260	699800	3	2	2	2	2	2	2
SLIV_10600	D6ERJ7	40.026	B	Integral membrane protein of unknown function containing CAP domain	2284200	2852000	2672000	3401000	5482900	4630900	4629800	6174200	6872300	7309800	5199200	8863900	4983000	9398400	2153500	1068700	843070	4054500	2615000	4326200	3021100	1853700	1519200	1649700	6270300	9523400	3129000	5635400	3740700	2946900	2672400	3483900	2490400	19138000	10874000	11486000	15637000	15671000	6	7	6	7	8	9	10
SLIV_10615	D6ERK0	29.141	A	Ribonuclease 3 (EC 3.1.26.3) (Ribonuclease III)	41054	0	0	0	0	58976	66717	0	0	0	68798	0	50689	0	102910	33401	15680	165430	143490	130510	206430	110650	37585	78956	278190	245060	213360	641620	582380	296760	0	393510	414160	0	39980	0	69037	0	1	0	0	0	0	1	1
SLIV_10695	D6ERL5	7.7515	A	Uncharacterized protein	42468	68627	63351	55494	67660	173110	0	618150	297490	251890	283600	573230	0	290770	47127	109890	66840	0	0	0	298290	104960	85308	73890	0	0	0	0	0	0	53540	76330	60059	0	0	0	0	0	1	1	2	1	1	2	0
SLIV_10770	D6ERM5	54.916	A	Glutamate--tRNA ligase (EC 6.1.1.17) (Glutamyl-tRNA synthetase)	3728	9503.5	2508	0	175000	230500	191470	143130	192560	121540	127260	236170	171930	148980	5620	8095.4	56298	141290	0	60176	92261	40155	52878	72184	266110	320680	106300	1148100	803290	691780	244300	218560	619110	448200	218570	398970	479050	349950	1	2	1	0	1	2	2
SLIV_10775	D6ERM6	28.189	A	5-carboxymethyl-2-hydroxymuconate delta-isomerase (Uncharacterized protein)	0	0	0	0	0	0	0	0	24641	0	0	0	0	0	0	0	0	0	0	0	0	0	0	9802.7	200450	64976	0	922940	333650	528080	0	116030	323200	0	0	0	0	0	0	0	0	0	0	0	0
SLIV_10830	D6ERN8	56.915	A	Propionyl-CoA carboxylase beta chain (EC 6.4.1.3)	50412	34472	35605	96031	19502	17560	120220	104500	120800	66871	44749	83235	58159	0	198980	14345	17271	39288	33828	42877	264310	66934	79566	29437	326500	99837	55927	315550	390710	255860	0	0	53650	0	34518	0	80949	55586	2	2	1	2	1	1	2
SLIV_10890	D6ERQ0	39.263	A	Branched-chain-amino-acid aminotransferase (EC 2.6.1.42)	39278	48662	41983	44452	62561	51436	84785	52652	82727	41933	55445	108900	74794	118040	122040	34514	26847	416210	125090	154860	17848	63155	19528	130080	849580	715040	127040	1045000	835600	478930	174140	189210	471460	209470	131450	269500	287160	192440	3	3	3	2	3	1	3
SLIV_10895	D6ERQ1	36.704	A	3-isopropylmalate dehydrogenase (EC 1.1.1.85) (3-IPM-DH) (Beta-IPM dehydrogenase)	101080	64597	0	73420	102360	0	78287	0	226140	0	0	184630	0	0	110460	33390	0	167210	145650	100140	176350	45208	55774	103740	410080	393730	227600	0	393060	324110	178090	401110	0	63424	33398	62644	100440	55637	1	1	0	1	1	0	1
SLIV_10905	D6ERQ3	59.362	A	Delta-1-pyrroline-5-carboxylate dehydrogenase (EC 1.2.1.88)	101070	33208	14539	24917	51464	31221	83115	122320	58766	36773	36860	64502	0	81331	225500	127930	128500	52890	166640	298150	306080	36552	136930	38984	158370	456130	191810	697060	366720	64637	20178	421930	486890	17388	16408	36191	65150	39241	3	3	2	2	3	2	4
SLIV_10930	D6ERQ8	55.046	A	D-3-phosphoglycerate dehydrogenase (EC 1.1.1.95)	336.55	300.17	0	0	0	0	1015.5	0	2382.3	0	0	27706	1298.6	0	1013.7	545.37	0	0	0	0	817.86	0	1002.8	2212.8	22154	12100	3178.5	195520	45492	67296	15283	53069	84531	0	5802.5	0	0	0	1	1	0	0	0	0	1
SLIV_10935	D6ERQ9	36.254	F1	Ketol-acid reductoisomerase (EC 1.1.1.86) (Acetohydroxy-acid isomeroreductase) (Alpha-keto-beta-hydroxylacyl reductoisomerase)	0	17129	14907	15592	0	0	22750	42071	58244	20107	22477	75931	10981	28865	74387	109240	98129	351740	0	176300	394200	153410	173280	341050	1046400	584580	478610	1003400	398870	419430	130820	367330	441120	0	0	26266	27599	0	0	1	1	1	0	0	1
SLIV_10945	D6ERR1	65.222	A	Acetolactate synthase (EC 2.2.1.6)	0	0	0	0	0	6678.8	0	0	0	0	0	0	0	0	17420	0	0	0	12138	0	0	0	8930.1	2140.6	24490	0	17112	49794	201520	46275	31563	26147	28599	27158	0	0	32037	0	0	0	0	0	0	1	0
SLIV_11000	D6ERS4	54.484	A	Aspartyl/glutamyl-tRNA(Asn/Gln) amidotransferase subunit B (Asp/Glu-ADT subunit B) (EC 6.3.5.-)	23172	0	5079.7	28730	17915	39037	42269	99787	130740	225700	31294	34196	5284.5	137160	109690	71772	76883	118440	0	95452	99185	42269	18241	79825	260470	372740	126370	314240	185370	240020	34484	71321	205370	28877	0	0	21611	0	3	0	1	2	1	2	2
SLIV_11010	D6ERS6	52.27	A	Glutamyl-tRNA(Gln) amidotransferase subunit A (Glu-ADT subunit A) (EC 6.3.5.7)	0	0	0	0	0	0	0	0	57678	31705	6305.5	13651	14148	26118	69436	23479	17290	108090	40373	47711	20139	10910	13871	12567	58738	63009	24836	93899	95575	62105	29544	26681	25435	0	0	0	0	42988	0	0	0	0	0	0	0
SLIV_11015	D6ERS7	10.779	A	Aspartyl/glutamyl-tRNA(Asn/Gln) amidotransferase subunit C (Asp/Glu-ADT subunit C) (EC 6.3.5.-)	85393	28566	24227	0	0	500100	100600	544440	555140	553560	0	0	0	267950	391900	285390	48844	177040	0	217690	700940	305260	52660	100020	415600	183910	168480	1102000	2110500	1204500	1381200	550900	0	1099900	491560	869560	1285900	509100	1	1	1	0	0	2	1
SLIV_11020	D6ERS8	17.422	A	Cupin-superfamily protein	0	0	0	0	0	0	0	0	0	0	40798	93571	0	0	106010	0	0	286540	187150	0	124460	74980	0	0	424470	0	0	0	0	0	0	0	0	0	0	0	0	0	0	0	0	0	0	0	0
SLIV_21050	D6ERU4	65.085	F1	Dihydroxy-acid dehydratase (DAD) (EC 4.2.1.9)	4223.7	0	0	16469	0	51075	17887	221800	71724	75110	20937	76656	17025	0	13844	10273	0	0	0	28206	6168.4	0	3256.6	3728.6	10573	325440	0	807120	92798	307190	74207	92125	320160	38263	13197	156010	41105	4385.6	1	0	0	2	0	1	1
SLIV_21055	D6ERU5	75.548	B	Integral membrane protein - Ser/Thr kinase containing quinoprotein alcohol dehydrogenase-like domain	41673	77572	44092	108140	60257	42290	105240	292030	222130	193110	92825	349900	69714	203220	78288	20770	311.2	233890	129370	214530	102640	28135	68892	77275	775000	1122500	279660	662670	53070	29683	73321	244530	378980	36097	69933	64749	72783	126380	3	4	3	4	2	2	3
SLIV_21065	D6ERU7	21.251	E	Secreted Lipoprotein (Sec) - Glycine-rich secreted protein	0	26445	61841	121160	124020	115980	146480	0	0	0	0	0	0	0	178810	59590	0	551050	383720	553090	282550	178170	0	0	429650	668940	356430	3572100	2478100	1228300	690970	2850100	2646900	770820	383140	540460	904660	532010	0	1	1	1	1	1	1
SLIV_21175	D6ERW9	42.455	A	Uncharacterized protein	284920	56660	260090	295310	594470	1120600	957670	618490	781940	2198100	534580	732080	156190	796720	1501700	1260100	867810	3913100	823390	3333900	3810100	1937600	1302300	2696500	8724700	8927200	4504400	6383400	6534700	2148400	1069500	1027000	2094500	783610	215030	500650	896610	524120	6	4	5	6	8	6	8
SLIV_21205	D6ERX5	33.136	A	Porphobilinogen deaminase (PBG) (EC 2.5.1.61) (Hydroxymethylbilane synthase) (Pre-uroporphyrinogen synthase)	0	0	0	0	0	0	0	0	0	0	0	0	0	0	0	0	0	0	0	0	0	0	4253.1	0	0	0	3200.5	87789	39384	42926	13750	16128	29996	0	0	0	0	0	0	0	0	0	0	0	0
SLIV_21245	D6ERY3	24.215	E	Secreted Lipoprotein (Sec) - Unknown function (DUF4232 family)	1773800	2039200	1860600	3022800	3448000	3330700	3654700	3703100	4438500	5624300	3610500	6480000	1780200	6046600	2198900	1181100	443130	3725100	2343500	2257900	4103200	2550900	1615200	2203700	7597400	10090000	3783600	8088600	4792900	2594200	2052400	4825600	4066200	5640100	3359100	4354500	6122200	2186200	5	5	4	5	5	5	5
SLIV_21250	D6ERY4	47.217	B	Integral membrane protein - Putative transcriptional regulator Cro/C1-type	24179	98132	24118	320830	185190	840730	835050	785620	808290	1428000	78679	583130	0	1927700	879350	702860	451710	1061500	120740	1880500	1255300	1056200	765400	797780	1951100	3495500	1760400	1721700	0	640290	531780	0	814690	808810	683160	697890	1052200	747020	2	2	2	2	2	2	2
SLIV_21270	D6ERY8	64.649	A	Arginine--tRNA ligase (EC 6.1.1.19) (Arginyl-tRNA synthetase)	18998	8845.3	13324	12723	29869	32177	22776	0	42845	75636	29885	60500	76014	35834	129800	92504	56611	523160	196810	374550	310520	90941	137080	268320	1147200	1201600	507120	1808600	915970	583170	160140	210620	537520	224250	11915	15572	218640	186590	3	2	3	2	3	3	2
SLIV_21290	D6ERZ1	29.551	E	Secreted Lipoprotein (Sec) - Serine-rich lipoprotein	164180	181000	202610	314620	349470	983150	1063300	728470	842440	1274700	362990	1367400	89046	1161100	370720	463880	241520	762120	65050	909740	654860	385950	296850	388470	1023200	739560	559400	1939900	2100900	1013900	286460	374930	527470	941470	306810	508480	863150	878590	1	2	2	2	3	6	6
SLIV_21470	D6ES26	29.652	X	Secreted protein (TAT) - unknown function	0	0	0	0	0	0	0	0	0	0	0	27924	0	0	0	0	0	94379	12814	0	0	0	0	82784	138250	116810	27309	2863700	4476900	1528000	81154	62175	0	0	0	0	0	0	0	0	0	0	0	0	0
SLIV_21580	D6ES51	16.353	X	Secreted protein (Sec) - Phospholipase A2 domain protein (IPR016090)	0	27991	139680	170130	178450	332560	61427	99198	83314	90620	74725	210590	0	93369	695810	671660	193150	3938000	778520	3383900	1718800	333170	380620	2289900	6207900	5197700	2896700	224130000	113940000	66428000	25521000	75598000	98778000	625430	191110	618340	581470	970740	0	1	2	3	1	3	2
SLIV_31520	D6ESA1	51.764	F1	Adenylosuccinate lyase (ASL) (EC 4.3.2.2) (Adenylosuccinase)	0	0	0	0	27284	27096	31922	18320	32645	27490	25399	38565	17980	30722	7212.3	3796.9	0	0	0	0	1584.1	6360.4	0	0	0	0	0	0	281530	0	43447	0	119760	55190	0	53881	67870	52618	0	0	0	0	1	1	1
SLIV_31565	D6ESB0	45.944	A	Adenosylmethionine-8-amino-7-oxononanoate aminotransferase (EC 2.6.1.62) (7,8-diamino-pelargonic acid aminotransferase) (7,8-diaminononanoate synthase) (Diaminopelargonic acid synthase)	0	0	0	0	0	0	0	0	0	0	0	0	0	0	0	0	7457.6	0	0	14993	0	0	0	0	40016	0	50196	397800	306720	218790	66775	78103	76499	0	0	1586.8	0	0	0	0	0	0	0	0	0
SLIV_31645	D6ESC6	58.273	X	Secreted protein (Sec) - Tripeptidyl aminopeptidase	580440	384250	412230	588390	964360	870600	715890	1174300	1723200	920520	916080	1557600	641990	1252000	274680	172530	73357	350880	315270	606800	256380	182590	73690	167680	555960	527100	296630	1455200	2357800	1096800	315410	615670	1214700	2367800	408550	1339500	1794700	1504400	7	6	7	7	7	8	6
SLIV_31855	D6ESG8	38.056	X	Secreted protein (Sec) - Cellulose binding protein	159380	209770	244620	331160	334270	357550	411700	273060	317530	257090	395880	578070	218830	578180	320560	198330	105670	620690	340160	565070	584750	346180	244390	314240	987810	1482800	494860	273090	575180	358660	184910	412740	397810	420020	232370	281510	400890	302360	1	1	1	1	1	1	2
SLIV_31940	D6ESI4	22.749	P	Secreted protein (TAT) - Amidase	29287	41416	29952	63388	65022	147120	234190	122640	100040	86683	16490	129420	34741	137080	116840	232730	1767.7	387130	194890	645640	276020	190260	160350	221430	481900	884480	398140	1763400	735550	293890	180000	415970	589100	1672.7	8414.7	137340	131920	123800	3	3	2	2	2	2	3
SLIV_00680	D6ESM3	22.388	X	Secreted protein (Sec) - Unknown function	0	0	0	50686	0	0	0	0	0	0	0	0	0	0	0	106080	121420	0	0	359620	0	0	159910	0	0	623000	332360	719290	0	0	0	0	396410	0	205660	0	0	255510	0	0	0	1	0	0	0
SLIV_00720	D6ESN1	13.737	X	Secreted protein (Sec) - Unknown function	0	0	0	0	0	0	0	0	0	0	0	0	0	0	0	0	0	0	0	0	0	0	0	0	0	0	0	1693200	1857200	890380	602310	1717500	752990	0	0	0	0	0	0	0	0	0	0	0	0
SLIV_00825	D6ESQ3	12.873	A	Glyoxalase/Bleomycin resistance protein/Dihydroxybiphenyl dioxygenase (IPR029068)	0	0	0	0	0	152960	76715	51566	0	246360	0	0	0	147430	148780	163470	151430	338400	0	315010	351930	193640	158100	200590	575010	424350	282630	810500	1191000	589340	434450	452040	451450	78129	88875	127850	160570	0	0	0	0	0	0	1	1
SLIV_01030	D6ESU5	61.752	X	Secreted protein (TAT) - Protein with Lysyl oxidase domain (IPR001695)	51728000	36401000	40745000	57304000	75551000	75266000	95455000	107210000	134050000	123070000	84920000	144500000	43228000	120700000	21080000	22577000	8978700	73330000	22598000	57809000	25980000	17418000	7427300	28017000	70067000	52111000	27199000	51376000	76751000	28281000	15505000	19276000	23543000	33488000	42875000	29672000	44166000	28531000	29	29	27	30	29	34	36
SLIV_01080	D6ESV5	19.45	A	Calcium binding protein	0	0	0	0	0	0	0	0	0	0	0	0	0	0	8444.5	0	25719	42833	0	0	0	0	0	48537	169790	129000	110700	3727300	3121200	2326300	1586700	1068300	1610400	0	0	17913	53196	36260	0	0	0	0	0	0	0
SLIV_01125	D6ESW4	45.548	A	Enolase (EC 4.2.1.11) (2-phospho-D-glycerate hydro-lyase) (2-phosphoglycerate dehydratase)	0	0	0	0	0	0	0	0	0	0	0	0	0	0	23631	13952	0	68431	0	31895	14788	8565.3	6288.6	23005	13672	0	35836	1123900	720770	304710	200540	441160	559440	0	0	0	0	32542	0	0	0	0	0	0	0
SLIV_01140	D6ESW7	18.77	X	Secreted protein (Sec) - Extracellular small neutral protease	0	0	0	0	0	0	0	0	0	0	0	0	0	0	6049	0	52312	142760	104580	0	0	0	35079	0	0	166590	0	8208100	4654900	3018900	1960800	3935900	3492700	0	0	0	114420	0	0	0	0	0	0	0	0
SLIV_01155	D6ESX0	30.349	A	LmbE family protein (Uncharacterized protein)	0	1054.8	3170	4862.5	0	0	16480	0	0	0	0	0	0	0	30950	25674	28675	0	0	0	55723	27034	22019	54873	80166	82491	45790	721350	683050	368430	230190	290780	532630	0	0	0	0	0	0	1	1	1	0	0	1
SLIV_01165	D6ESX2	23.284	A	Isomerase	0	0	0	0	0	0	0	0	0	0	0	0	0	0	19758	21710	31196	53744	0	0	0	9951.2	18469	38640	209840	115660	75932	737580	313360	306860	70776	182790	245820	0	0	0	0	0	0	0	0	0	0	0	0
SLIV_11070	D6ESY4	26.018	X	Secreted protein (TAT) - N-acetylmuramoyl-L-alanine amidase	0	27458	20382	111040	198840	251260	321550	363420	558630	529680	70532	401280	58136	456420	313210	87876	104010	765830	0	1068900	1139600	192850	254230	833570	2583600	3345100	1472100	0	0	0	0	0	0	225150	120290	11178	25220	0	0	1	1	1	2	2	4
SLIV_11120	D6ESZ4	65.313	E	Secreted Lipoprotein (Sec) - Oligopeptide-binding lipoprotein	1495000	1502900	1353800	2347500	3186300	3706200	4519200	4343500	5920500	7952100	3591900	8205300	1798700	6783400	2729900	1380900	1105800	7809500	1813700	7755900	3785500	2305800	1356800	2540100	10525000	13099000	4468200	10023000	6178600	4062800	1604300	3083100	5245600	3047400	3159100	2683600	4053000	3116300	16	17	14	18	17	17	21
SLIV_11150	D6ET00	13.264	A	Glycine cleavage system H protein	0	56333	0	13651	0	81752	542040	534730	479610	1914800	1247500	0	155560	88022	0	0	0	0	859040	107630	0	19788	45789	56565	268250	2631200	114990	5850000	2886400	1705600	186810	370550	218970	0	0	0	0	0	0	1	0	1	0	2	2
SLIV_11155	D6ET01	44.775	F1	Serine hydroxymethyltransferase (SHMT) (Serine methylase) (EC 2.1.2.1)	9085.7	8959.9	3595.9	10302	9158.8	15264	10739	11228	0	0	7284.8	20008	0	5299400	26185	10937	8740.2	49344	38721	31890	23000	13123	8115	14693	79626	82491	40700	435050	132070	71729	57236	119840	187140	0	0	0	0	0	1	1	1	1	1	1	1
SLIV_11185	D6ET07	7.7424	A	Calcium-binding protein (Uncharacterized protein)	1073200	1819000	1694600	2191100	4376400	3476500	4200800	6131400	6483900	10901000	3233100	4977400	690010	5437000	1241600	1213900	949740	4472400	616620	4744800	6352600	2603300	1235600	3526300	5153400	11848000	3905100	34857000	19475000	16075000	9755800	9904800	14015000	5362900	2511600	484790	3804900	3281000	1	3	2	2	4	4	5
SLIV_11200	D6ET10	22.469	X	Secreted protein (TAT) - Unknown function	28565	24048	70714	153320	165280	199760	121990	164400	322560	392110	90183	0	0	350820	738570	332930	265070	1128000	218490	985990	1397000	713690	500260	591350	2689100	3038100	1268300	2772200	1665600	830990	820430	1359600	1484800	125790	124130	167930	46202	206140	2	1	3	3	3	2	2
SLIV_11270	D6ET24	71.22	X	Secreted protein (TAT) - Neutral zinc metalloprotease	0	0	0	0	0	0	0	0	0	0	0	0	0	30033	16192	0	0	25254	15124	0	28158	14550	4181.5	16235	56679	22518	41900	1918700	1262900	553570	198600	806130	1018900	0	13373	0	0	0	0	0	0	0	0	0	0
SLIV_11275	D6ET25	56.999	X	Secreted protein (Sec) - Neutral zinc metalloprotease	25720	35628	35940	14150	54477	114950	189380	43048	68858	116710	41814	159970	8751.5	210590	190310	70594	25658	193590	62009	172880	74764	49548	35902	38715	113470	139370	152370	18627000	10668000	5292500	3796700	11224000	12207000	293460	1978	56057	12570	0	2	3	2	1	2	3	7
SLIV_11385	D6ET47	43.38	F1	Acetate kinase (EC 2.7.2.1) (Acetokinase)	6867.1	1122.3	0	7388.5	9639.8	0	12116	34824	30028	21859	0	0	7519.4	0	11442	15361	11835	44057	8795.9	16803	11706	5800.4	23188	24034	111970	152360	41630	273880	95680	99551	74843	115340	118090	0	0	9728	10359	4831.9	1	1	0	2	2	0	1
SLIV_11405	D6ET51	22.327	X	Secreted protein (Sec) - Cholesterol esterase	11152	0	14311	428780	563540	52672	124360	107660	918000	528600	51891	69361	14146	1050300	0	0	0	546670	0	59243	10706	0	0	16451	383630	1073300	379280	33332	10009	0	85996	0	214870	0	13056	284630	183440	468160	1	0	1	2	1	1	1
SLIV_11410	D6ET53	34.44	A	Thioredoxin reductase B	76165	70824	37900	59007	88085	130410	100190	150720	255980	320950	13940	204550	38472	176280	128020	85396	83617	326700	23353	254630	48134	91496	26995	70339	137460	348230	260240	931320	836260	330940	207220	196430	224930	21225	5586.9	0	0	0	2	1	2	2	2	4	4
SLIV_11500	D6ET70	40.987	A	Putative acetyl-CoA acetyltransferase (EC 2.3.1.9)	119920	82979	82013	109790	127100	160510	0	216010	278660	157310	100770	251680	32987	218250	241670	105300	91935	300270	131880	258520	297430	135950	103290	206790	534010	473670	328700	842070	642750	360990	263260	546710	605450	0	70255	0	108040	0	1	1	1	1	1	1	1
SLIV_11505	D6ET71	16.082	A	Methylmalonyl-CoA epimerase (Uncharacterized protein)	0	0	0	0	0	57421	304590	394840	141160	339850	0	0	0	162170	328900	153310	98033	106360	25814	511700	89269	417640	245940	335070	1964400	1381800	682700	2846500	3510500	3232200	591530	3068900	3686000	61775	138950	162190	46976	42168	0	0	0	0	0	1	2
SLIV_11515	D6ET73	34.605	A	Cellulose-binding protein	7205.6	194.81	6240.5	0	1999.9	35238	35749	32180	21238	35563	12771	39483	0	0	39778	20121	4554.3	38885	14385	162800	93149	49244	14933	37494	103080	75444	78060	488310	909550	352750	109510	78505	70405	102860	40014	33310	72273	39555	1	1	1	0	1	2	2
SLIV_11550	D6ET80	14.303	A	Uncharacterized protein	0	0	11089	0	0	0	0	89777	100660	292720	37206	0	0	0	180360	0	79171	261500	0	0	0	0	0	0	0	0	0	525090	337990	282460	124100	146660	345010	0	0	0	0	0	0	0	1	0	0	0	0
SLIV_11625	D6ET97	52.178	F1	ATP synthase subunit beta (EC 3.6.3.14) (ATP synthase F1 sector subunit beta) (F-ATPase subunit beta)	159510	127630	107020	149250	126660	213490	203840	279920	191510	51645	88499	297670	93929	72933	178010	18901	68780	356490	282620	233670	0	43102	39654	70644	351840	249130	224540	143890	282390	113050	67879	91136	40585	34784	57241	46471	78601	59576	3	3	3	3	3	3	2
SLIV_11635	D6ET99	57.256	F1	ATP synthase subunit alpha (EC 3.6.3.14) (ATP synthase F1 sector subunit alpha) (F-ATPase subunit alpha)	0	2134.6	0	6459.8	3784.9	39950	3102.9	60603	33184	132570	25553	26229	0	157540	41479	12524	0	81191	0	57117	49046	4620.1	14476	32236	131250	149160	75556	298690	344680	359890	238490	182270	190920	80596	0	55322	72445	43265	0	1	0	1	1	2	1
SLIV_11695	D6ETB1	8.1191	r	50S ribosomal protein L31	117240	49676	117400	222470	385770	0	791710	0	0	290010	0	184870	0	0	0	0	0	0	0	214240	0	0	0	0	356180	0	0	0	514260	262240	359400	233970	0	0	0	1417200	2034100	1043900	1	1	1	1	1	0	2
SLIV_11700	D6ETB2	39.966	B	Integral membrane protein containing cell envelope-related transcriptional attenuator domain (IPR004474)	390360	385310	312030	613810	671980	835280	1084200	1127300	985890	1562000	734260	1210900	466420	1554000	294250	202760	91573	595990	315660	725560	355180	160630	120590	281390	750450	538580	290750	925740	900550	177020	144270	215840	351530	274130	619390	757660	1328600	854580	6	5	5	7	4	6	6
SLIV_11715	D6ETB5	36.77	A	Threonine synthase (EC 4.2.3.1)	5069.6	84.337	0	0	163.87	12334	18853	5353.4	0	0	0	0	0	0	11762	3936.5	0	46759	27849	38508	17553	13705	12852	28466	43762	124610	73375	553550	75398	117570	39191	92946	220970	0	0	0	0	0	1	1	0	0	1	1	1
SLIV_21720	D6ETD1	42.089	E	Secreted lipoprotein (TAT) - L,D-transpeptidase catalytic domain (IPR005490) SbsA, Ig-like domain (IPR032812)	899710	1015600	1049400	2517600	2302800	5062800	4266600	2823800	3108100	7381600	1619600	3542800	925240	6411600	6813900	5812500	6061400	20283000	3248100	17134000	10704000	4600000	4844200	9912800	35239000	29828000	13836000	54866000	29365000	17391000	8182400	14191000	18159000	2859400	5221500	3753500	6287800	2919600	9	10	8	10	10	13	12
SLIV_21735	D6ETD4	6.4839	A	Uncharacterized protein	272720	279990	0	244020	579700	700200	486690	289160	371820	329040	94017	52462	0	347370	227200	150250	96761	299500	0	438200	583840	383850	139910	257360	1089900	407000	381010	220600	630390	208330	163730	0	0	964370	0	643900	873480	686650	1	1	0	1	1	1	1
SLIV_21770	D6ETE1	102.11	B	Integral membrane protein - Penicillin acylase	65042	74572	37041	113970	104110	219910	152310	166710	163260	169060	70276	171760	19236	198190	32128	16572	13433	52181	0	0	0	50122	20153	27672	84966	0	51004	0	42061	0	15772	0	0	84688	120100	87497	11925	16920	1	1	1	1	1	2	1
SLIV_21820	D6ETE9	17.961	A	Acetyltransferase	0	0	23095	0	0	0	0	135990	264690	183600	157010	455430	73606	190180	0	0	1581.2	0	0	0	0	0	0	0	0	339180	0	203910	0	87656	0	110090	98801	124190	0	123880	167020	132670	0	0	1	0	0	0	0
SLIV_21910	D6ETG7	58.027	P	Secreted protein (Sec) - Penicillin binding protein	483830	463170	315100	552110	752600	340130	643550	884630	1101600	1440700	509830	1210000	426990	1456500	555140	363710	202470	1346500	376230	1258400	901920	296510	363030	664420	1767800	3257800	1265100	1688100	612820	307540	266100	328030	581390	30732	135180	99271	38988	172560	12	10	9	11	9	8	12
SLIV_21915	D6ETG8	55.546	B	Integral membrane protein - Penicillin-binding protein	717710	666130	519480	961630	1212300	1540500	1631000	1369700	2282400	1256500	1357300	2332600	785090	2522300	487080	513570	305260	1545100	523570	885570	584170	415450	279390	631240	1771400	1069200	815220	186060	263750	109950	27951	72345	91911	1273200	512650	334380	458540	329190	9	7	7	10	10	11	12
SLIV_21995	D6ETI4	33.869	A	UDP-glucose 4-epimerase (EC 5.1.3.2)	6654.9	0	0	7528	0	0	115740	0	0	0	12557	7641.2	0	0	39855	0	7176.8	56839	21219	42951	41250	0	12235	19516	121870	100200	55432	245430	196500	113050	32709	111220	198650	131100	40704	0	201050	100770	1	0	0	1	0	0	1
SLIV_22000	D6ETI5	40.79	A	Galactokinase (EC 2.7.1.6) (Galactose kinase)	21232	0	446.3	0	46426	10356	10363	0	0	0	19320	23520	0	0	127870	44402	14683	182550	173110	139310	269700	79491	31572	92514	305420	506580	262930	1405200	648740	434520	185060	481890	558160	138240	22345	13237	63903	39773	3	0	1	0	2	1	1
SLIV_22060	D6ETJ8	20.828	r	50S ribosomal protein L25 (General stress protein CTC)	0	0	0	0	0	55384	0	0	0	18392	0	0	0	0	0	0	15770	156790	0	220150	89616	0	45519	71171	60537	98003	0	0	0	0	0	0	0	28476	0	0	0	0	0	0	0	0	0	1	0
SLIV_22090	D6ETK2	46.17	B	Integral membrane protein - Two-component system sensor histidine kinase	5418.3	0	0	0	0	27761	0	0	0	0	0	12796	0	0	0	0	0	0	0	0	0	0	0	0	0	0	0	0	0	0	0	0	0	0	0	0	0	0	1	0	0	0	0	1	0
SLIV_22135	D6ETK9	89.24	B	Integral membrane protein - ABC transporter	18668	32575	32008	16488	41464	36789	54087	59006	75003	32075	48107	174830	42736	63676	14862	12654	27067	57344	17959	23714	0	0	6490.1	14322	25368	0	17182	70064	169700	43646	32204	35378	51307	0	26859	10866	23174	16747	2	3	3	1	2	2	3
SLIV_22150	D6ETL2	27.422	E	Secreted Lipoprotein (Sec) - Unknown function (DUF1524 domain)	0	45452	18373	49517	73000	30955	14152	144360	61092	0	0	0	0	216720	0	0	0	0	0	56942	46910	24781	0	27454	58064	0	26944	93653	0	38365	0	0	0	215590	179070	115660	229820	269070	0	2	1	2	2	1	1
SLIV_22180	D6ETL8	23.506	E	Secreted lipoprotein (TAT) - Putative foldase (IPR027304)	665240	550420	737280	875850	1366600	1423300	1699400	1255300	1617000	1523600	1470300	2532900	768200	1495700	539170	241000	165770	1404400	609660	853330	492210	254130	140260	431040	1004000	1281000	665200	340780	138940	61076	35270	89001	142800	292730	137460	226080	0	257270	4	3	4	4	4	4	5
SLIV_22195	D6ETM1	33.751	X	Secreted protein (Sec) - Secreted protein with Lysozyme-like domain (IPR023346) and LysM domain (IPR018392)	49520000	17694000	51530000	97885000	145880000	89457000	114610000	184020000	217980000	238350000	157590000	220290000	52985000	207510000	37962000	14457000	869060	80388000	23811000	112500000	61203000	46040000	16567000	32628000	79560000	212990000	62356000	130080000	67759000	33820000	16475000	69840000	90793000	164730000	71309000	104700000	166320000	150670000	5	4	6	5	5	6	6
SLIV_22200	D6ETM2	24.833	X	Secreted protein (Sec) - Protein with Lysozyme-like domain (IPR023346) and LysM domain (IPR018392)	40591000	32100000	28949000	53771000	77218000	60065000	75842000	122390000	170210000	164080000	89217000	196610000	71003000	197590000	54624000	29541000	18504000	106340000	61103000	101000000	101310000	58884000	39216000	47447000	134690000	235630000	98019000	421660000	211460000	161520000	111260000	285930000	245980000	188220000	114740000	109020000	172610000	117180000	9	9	6	10	8	11	12
SLIV_22205	D6ETM3	45.482	A	Enolase (EC 4.2.1.11) (2-phospho-D-glycerate hydro-lyase) (2-phosphoglycerate dehydratase)	20741	23697	5225.4	9631	13264	70519	21967	40233	30923	0	0	74448	0	0	44153	0	0	31914	23996	138430	42046	0	9017.8	0	0	27598	49968	0	14032	0	10918	0	0	0	0	0	0	0	1	1	1	1	1	1	1
SLIV_22220	D6ETM6	33.415	A	Hydrolase	0	0	46607	47112	0	39720	31111	95195	126770	99172	0	43300	0	76897	125410	86101	12654	224690	0	278100	236140	32739	100890	169620	631310	622290	114320	1959300	989050	655540	288400	614460	897940	0	34105	0	0	25885	0	0	1	1	0	1	1
SLIV_22260	D6ETN2	26.008	E	Secreted Lipoprotein (Sec) - Unknown function	0	0	0	0	0	0	0	47776	43213	0	40803	59445	0	0	0	0	0	0	0	0	55091	0	0	0	0	0	0	0	120650	0	16396	373260	0	0	0	0	0	0	0	0	0	0	0	0	0
SLIV_32385	D6ETX4	27.778	A	Electron transfer flavoprotein subunit beta	0	0	0	0	0	137220	92679	46019	0	150920	0	0	0	47517	100740	0	74486	76598	0	0	134720	67148	92796	0	313900	0	123320	0	260070	282320	0	0	0	65873	62135	0	0	0	0	0	0	0	0	1	1
SLIV_32395	D6ETX6	45.932	A	Citrate lyase beta subunit-like (IPR011206)	0	8544.5	0	26393	814.42	75016	0	30769	41622	0	31165	66334	35719	0	0	0	0	0	0	0	0	0	9151.9	9978.3	0	0	0	701070	0	0	10641	203700	475740	0	0	0	192940	3730.6	0	1	0	1	1	2	0
SLIV_32425	D6ETY2	47.575	A	Peptidase M20 (IPR002933)	43988	29336	20556	52498	44589	4650.5	60220	86431	147050	112170	59950	107060	37692	56013	190500	96897	97052	488190	254870	325630	416780	154080	177480	244610	1099900	1409800	551120	1559100	577100	398540	222200	498390	621900	17434	0	0	0	8969	3	2	1	3	2	1	3
SLIV_32550	D6EU07	17.597	X	Secreted protein (Sec) - Phospholipase A2 domain protein (IPR016090)	17119	36492	12675	23388	33343	72241	117600	0	67791	0	0	0	0	21694	84237	99788	147380	485760	113380	422290	80353	15286	59463	91541	291310	939830	442080	1890200	1197800	827170	268630	402560	592500	0	0	0	0	0	1	1	1	1	1	2	2
SLIV_01370	D6EU61	31.47	A	Oxidoreductase	39264	7803	10589	23196	17296	0	43831	21942	29085	0	23304	45493	0	93514	0	0	0	60785	15887	15702	0	8351	2589.4	80139	7845.5	0	0	0	59459	0	0	0	95830	0	0	0	0	0	2	1	1	1	1	0	1
SLIV_01430	D6EU74	41.789	X	Secreted protein (Sec) - Glucan endo-1,3-beta-glucosidase (EC 3.2.1.39)	0	0	0	0	0	0	0	0	0	0	0	0	0	101960	63283	17735	15472	141740	0	170660	37247	0	50557	21485	163700	100890	27366	2794900	1633100	1249800	705640	1267300	1682100	158180	151300	194290	266740	171530	0	0	0	0	0	0	0
SLIV_01600	D6EUA9	49.626	X	Secreted protein (TAT) - Glycoside hydrolase, family 43 (IPR006710)	17015	13795	22526	49932	6304.4	76131	46253	46139	61138	0	43408	45163	42001	136690	38556	35678	32276	88765	72267	70935	122700	57912	44360	97213	447950	474200	124860	201620	258150	114630	57093	29398	143910	89517	65064	26713	33923	28403	1	1	1	2	1	2	2
SLIV_01730	D6EUD5	71.628	F1	Chaperone protein HtpG	14621	0	6523.7	5345.5	23575	26868	27630	20979	41721	37643	8440.7	14739	0	14708	14509	0	7163.3	0	0	13608	0	0	0	8089.1	26365	0	0	50202	69075	43338	0	0	10827	54169	0	27784	57633	30268	1	0	1	1	1	1	1
SLIV_01755	D6EUE0	34.967	F1	Glyceraldehyde-3-phosphate dehydrogenase (EC 1.2.1.-)	7071.6	11576	9416.9	14588	24621	155320	0	158790	192830	97003	92219	265020	40815	208250	133120	51559	23144	61544	0	106990	218000	86671	73007	129220	193200	176390	149950	1048200	523960	885880	228650	432810	932870	184280	194420	49470	0	13234	1	1	1	1	1	2	0
SLIV_01760	D6EUE1	17.889	A	Peptidyl-prolyl cis-trans isomerase (PPIase) (Putative PpiA homologue) (EC 5.2.1.8)	1564800	2971600	907090	3458500	2960500	10069000	5624000	6461700	10251000	16697000	2759900	11840000	2828700	16585000	4054400	2618700	3919600	18776000	2908000	14833000	14424000	3927500	5673100	12589000	35199000	42361000	13675000	109830000	65411000	58688000	21676000	41460000	50777000	5542200	2318300	1960800	4336400	4121200	4	4	4	5	4	7	7
SLIV_12055	D6EUM5	33.994	A	Dehydrogenase	0	0	0	0	0	0	0	0	0	0	0	0	0	0	0	0	0	0	0	7599.1	0	0	0	0	7749.3	0	0	145380	0	93082	0	0	46114	0	0	0	0	0	0	0	0	0	0	0	0
SLIV_12060	D6EUM6	42.059	A	Putative NAD-dependent malic enzyme 4 (EC 1.1.1.38)	17158	0	0	15636	0	0	0	0	0	0	0	0	0	15452	28548	0	15767	43998	49973	29466	42466	17319	6692.4	32510	233510	262740	128580	552470	324390	211050	107290	130930	218260	0	0	13032	14874	0	1	0	0	1	0	0	0
SLIV_12065	D6EUM7	33.388	E	Secreted Lipoprotein (Sec) - Solute-binding protein	36830	57061	0	0	49907	95184	31028	0	0	0	115200	323150	0	0	244670	16190	16658	390280	154390	409230	137420	29807	112920	84512	544570	283670	172180	385320	0	72075	0	120330	611430	412480	89670	17455	457640	354230	1	1	0	0	1	3	1
SLIV_12080	D6EUN0	29.6	A	Methyltransferase	56337	64893	50552	67610	71789	0	111810	0	0	0	31162	195550	0	0	50987	0	47609	180740	17654	120910	195580	35614	0	0	218250	191290	77207	784220	1212400	1149100	369910	839600	891400	378020	229710	313390	428400	288770	1	1	1	1	1	0	1
SLIV_12095	D6EUN3	14.703	A	Superoxide dismutase [Ni] (EC 1.15.1.1)	2214700	767290	1710800	2236900	2091700	4370500	2728700	9099600	9089000	7811700	7829300	16410000	3047300	6383300	4999300	1224900	253880	6387300	6826200	8976000	11019000	5380100	1619900	3529400	17569000	20708000	10853000	25807000	20384000	8324000	5513400	11445000	9349200	2891000	1938000	4139200	3104900	4361000	5	4	5	3	3	5	4
SLIV_12120	D6EUN8	52.192	A	Nucleotide-binding protein	92566	53403	29815	50818	57478	69819	71835	201790	276610	138280	44356	244290	10398	60207	162200	37920	43264	141920	120120	95967	163560	43821	53603	140530	136620	234500	171210	2003800	1543100	459200	296420	457270	1736800	0	16414	0	0	10917	3	4	3	2	2	1	1
SLIV_12260	D6EUR8	24.184	F1	Peptide deformylase (PDF) (EC 3.5.1.88) (Polypeptide deformylase)	274740	185340	153780	308010	337390	309270	389480	153590	307520	326800	356890	423830	175000	137210	1131200	580880	580720	1890100	830940	1669800	2375100	1480000	885690	988180	4471700	4588200	2358500	2602500	2539000	1085000	341930	514540	846900	55333	107550	76792	128420	49692	4	3	4	4	4	3	3
SLIV_12355	D6EUT8	109.55	B	Integral membrane protein of unknown function (UPF0182 family)	177380	193170	196460	288090	427450	367050	374330	334610	536770	439980	219470	404140	78338	599620	251690	140470	96043	455570	173760	539680	414230	247580	155810	211080	528730	941960	346370	0	6476.2	5507.2	0	4454.8	4286.1	485110	358730	390270	416980	272590	5	5	5	5	5	6	7
SLIV_22430	D6EUV9	74.105	X	Secreted protein (Sec) - Esterase	4087900	4264700	4402200	7482500	8283700	12862000	12246000	9060900	10173000	18379000	6210000	11221000	1643100	14117000	12485000	7436500	4646900	32162000	6537400	35199000	19556000	10719000	7399200	13951000	47383000	52673000	23055000	85187000	51617000	35469000	16215000	39213000	46950000	12858000	7311500	11988000	15236000	13052000	13	13	13	14	13	16	16
SLIV_22535	D6EUY0	50.387	X	Secreted protein (Sec) - Unknown function	165140	155630	169550	349080	377110	405980	484490	379960	491500	462560	345380	673060	210590	356970	266030	211940	178160	800030	0	606090	191440	149880	92744	195430	748410	574040	385430	156590	271450	0	92878	111980	48176	371820	594310	266040	404560	299210	3	3	2	5	5	4	6
SLIV_22580	D6EUY9	52.939	A	Adenosylhomocysteinase (EC 3.3.1.1) (S-adenosyl-L-homocysteine hydrolase)	14090	9165.9	5450.1	3716.8	4137.7	27889	0	505720	21988	54326	0	24156	2009.4	0	51843	9141.4	7095.6	84197	48897	85355	28165	10638	30396	18834	338560	302920	178010	1127200	186820	415030	184490	342840	583010	0	0	0	7167.1	8533	3	4	2	1	1	3	0
SLIV_22655	D6EV06	63.727	E	Secreted Lipoprotein (Sec) - LpqB Quinoprotein amine dehydrogenase, beta chain-like (IPR011044) with GerMN domain (IPR019606)	334060	388860	317980	523310	759690	763720	814840	901860	1338500	1949600	500770	1475900	80536	1239200	444810	282010	170780	1258200	322290	1146700	802600	433930	412930	562650	2438600	3723200	936700	2367400	666160	420890	439360	529780	646870	1127700	557670	727050	1404200	873810	12	11	11	12	15	14	15
SLIV_22685	D6EV12	106.46	F1	Protein translocase subunit SecA, component of Sec export system	0	0	0	0	0	0	0	38318	39227	0	151240	287150	0	0	110380	52637	37987	182300	0	37672	191270	113530	87456	75583	288640	575240	162450	0	0	0	0	0	0	0	211200	110390	153930	0	0	0	0	0	0	0	0
SLIV_22695	D6EV15	17.358	A	Uncharacterized protein	131840	96493	65857	82143	135270	208630	216440	144040	283330	199290	261800	420580	88474	188560	381380	91853	207520	684380	536460	492460	571260	145590	60186	90682	1161200	819290	535440	617350	1152400	291200	213340	573640	327200	273370	62830	119560	0	303000	3	3	2	2	2	3	3
SLIV_22940	D6EV65	48.661	F1	NAD-dependent malic enzyme (EC 1.1.1.38)	0	0	0	0	0	0	0	0	0	0	0	0	0	0	0	0	0	0	0	0	0	0	0	0	0	0	0	0	0	0	7353.7	0	0	0	0	0	0	0	0	0	0	0	0	0	0
SLIV_22945	D6EV66	9.8511	A	DNA-binding protein HU (Hs1)	1389000	956940	511740	3324000	717740	5689400	1280300	2082700	4191000	1881900	1450300	4420200	138090	1534200	1044500	877730	776710	3137800	1812400	836100	1458500	677120	925140	2024500	8689500	7316900	3692700	11312000	11293000	5915400	1982300	1282200	3336100	234240	560890	486940	0	359080	2	1	2	2	1	2	2
SLIV_32725	D6EV85	17.538	A	Mut-like protein	16096	0	14562	15259	0	28308	19529	0	17831	0	0	10469	0	0	48308	91501	55912	73600	0	69462	105200	0	60372	91072	258870	172660	139120	816600	1080800	462580	455080	628520	924090	80575	0	47610	65838	0	1	0	1	1	0	1	1
SLIV_33050	D6EVF3	14.692	A	Aspartate 1-decarboxylase (EC 4.1.1.11) (Aspartate alpha-decarboxylase)	0	0	0	0	31834	238670	344120	0	0	0	0	0	0	0	0	62592	48721	0	0	0	0	0	517750	456000	270480	0	0	1089000	1126800	0	424530	506460	0	645870	0	889410	636670	0	0	0	0	0	1	1	1
SLIV_33055	D6EVF4	12.343	A	Acyl-transferase (IPR016181. Acyl_CoA_acyltransferase/IPR031165. GNAT_YJDJ)	0	0	0	7455.7	13548	53251	0	26242	0	83385	0	0	0	50817	0	99722	27978	104270	0	81170	109570	32984	50833	68809	190620	135680	79158	654120	1161800	912010	627770	203480	265210	0	0	123170	0	0	0	0	0	1	1	1	0
SLIV_02010	D6EVN4	38.044	B	Integral membrane protein of unknown function	30612	31424	23348	24910	37921	22255	56930	43061	50037	50847	33935	55971	14295	57329	43825	45509	0	90465	37503	0	52430	21007	2246.8	14991	161260	0	0	131420	136970	48892	40938	0	48424	152690	56758	119640	0	113610	2	2	2	2	2	1	2
SLIV_02045	D6EVP1	36.624	X	Secreted protein (Sec) - Carbohydrate-binding/sugar hydrolysis domain (IPR006633) with Pectin lyase fold (IPR012334)	282930	199400	230260	300920	375420	477480	800440	348090	657190	496730	313250	540660	125100	478020	279440	172690	110390	928670	642580	1004400	714690	283340	169430	251320	974040	2372600	865770	341410	555130	219160	37634	0	299310	33626	34941	0	0	0	5	3	4	4	4	4	6
SLIV_02095	D6EVQ3	57.487	A	Phosphoglucomutase (EC 5.4.2.2)	173490	62464	210750	222910	723840	596450	573740	243320	358800	282170	237000	480340	327860	257080	0	11893	14184	52289	0	0	36772	14684	19441	21570	66038	60201	43910	496520	362380	269800	185690	136120	268850	2200500	787460	2113800	3439100	2307800	2	1	1	2	1	1	1
SLIV_02315	D6EVU6	34.094	E	Secreted Lipoprotein (Sec) - Binding-protein-dependent transport	1080500	985100	1119500	1505100	2032800	1996200	2164200	2472600	2352500	784410	2121400	3649500	1064400	1269700	468690	275900	169710	1004900	622920	1113400	846460	545440	347180	512590	1660500	2258100	960750	7988700	5037300	3119900	1984300	4677500	5012900	1951300	1336900	1402300	1816200	1098200	5	6	5	5	6	7	8
SLIV_02325	D6EVU8	45.724	X	Secreted protein (Sec) - Lipase (IPR005152) with Alpha/Beta hydrolase fold (IPR029058)	0	0	0	0	0	14142	8529.1	0	0	14333	0	0	0	0	0	0	0	0	0	14594	0	0	2936.6	0	13046	8201.2	0	0	0	0	0	0	0	0	0	0	0	12303	0	0	0	0	0	1	1
SLIV_02525	D6EVY9	30.631	A	2,5-diketo-D-gluconic acid reductase B (EC 1.1.1.274)	0	0	0	0	0	0	0	0	0	0	0	0	0	0	28151	22511	20453	86258	39958	37670	0	0	0	0	107050	9683.5	35933	429860	345330	225900	44292	156960	184340	0	0	0	0	0	0	0	0	0	0	0	0
SLIV_12390	D6EVZ4	18.776	A	Hydrolase (Uncharacterized protein)	0	36894	23902	57766	66619	60799	56555	72409	0	0	0	0	0	0	79194	0	44457	171260	13121	122310	0	0	0	67142	295100	262180	152930	224570	279510	0	126790	92278	165350	0	0	0	19154	41783	0	1	1	1	1	1	1
SLIV_12445	D6EW05	8.6907	A	Glutaredoxin-like protein	0	0	0	0	0	232570	180640	364960	0	369800	0	791960	0	4039000	57269	0	46190	135580	0	107610	106950	66336	85239	0	268500	224520	110660	2965900	5634200	2847700	156710	2444400	0	860790	0	0	1567400	0	0	0	0	0	0	1	1
SLIV_12485	D6EW13	54.224	E	Secreted Lipoprotein (Sec) - Peptidase S33 tripeptidyl aminopeptidase-like protein	110920	201940	146240	227010	415100	430650	626000	204910	356250	462350	254350	740200	230440	355870	195350	289400	83265	377400	356170	768650	242190	221980	87151	283220	339090	935340	124170	433210	204700	86302	117830	0	74588	1217500	616200	972160	1328400	1582600	4	4	4	4	4	4	4
SLIV_12490	D6EW14	42.634	A	Putative adenylyltransferase/sulfurtransferase MoeZ (EC 2.7.7.-)	0	0	0	0	0	0	0	0	0	0	0	0	0	0	0	0	0	0	0	0	0	0	0	0	0	0	0	0	212700	0	0	43035	0	0	0	0	0	0	0	0	0	0	0	0	0
SLIV_12515	D6EW19	57.73	A	Domain of unknown function DUF3152 (IPR022603	170020	197110	114790	242920	326090	391120	466590	408090	443940	264150	273830	555980	274900	567040	179630	164300	145570	384820	207020	382560	288470	168520	121000	193760	576450	558790	289250	154720	266460	63165	72399	82419	40119	410060	284370	332210	446820	343610	3	3	3	3	3	3	3
SLIV_12640	D6EW45	33.053	B	Integral membrane protein - Putative zinc finger containing protein	1077700	1094400	931570	1615200	1978600	1980500	1992800	1946300	2625300	2225200	1847500	3602800	1837700	2941300	480210	336590	0	893780	518920	887110	303740	250010	121870	457930	1264100	835690	0	0	0	0	0	0	0	28029	0	0	0	0	1	1	1	1	1	1	1
SLIV_12695	D6EW56	12.978	X	Secreted protein (Sec) - ATP-binding protein	3431800	1455000	2013700	5344100	5189100	7444800	9394600	13733000	13794000	17509000	13305000	21727000	4913700	13858000	10240000	7884600	2411100	28241000	15426000	24613000	8355500	4026000	4501300	12769000	21170000	24690000	13789000	43976000	39434000	14818000	11164000	21658000	28018000	914250	670560	1002500	1234400	1467100	6	6	6	7	6	9	10
SLIV_12705	D6EW58	11.879	A	Ferredoxin	734840	1019600	298990	2434800	2027500	6038000	3905500	4260900	4803700	11415000	1325100	2343800	141610	11075000	7294400	4850500	4843900	9441500	1100800	9185500	14340000	7165900	6654700	7937000	20159000	22912000	11548000	52412000	40682000	31111000	18526000	29350000	31008000	12137000	5726500	7312500	9543900	5802600	3	3	3	3	3	4	4
SLIV_12815	D6EW80	65.532	E	Secreted Lipoprotein (Sec) - ABC transporter lipoprotein BldKB (BldKB)	213080	243200	133640	251750	377290	373040	377860	707950	995170	1137900	469870	1083100	163110	1033100	157060	133690	66088	605320	279160	671310	327000	129940	163060	353120	1200000	2366800	559710	2253700	933520	659240	251520	737650	948030	387040	302160	477530	607740	420110	10	9	8	9	9	8	9
SLIV_12880	D6EW93	7.0367	A	Uncharacterized protein	40251	28415	0	240980	472580	308000	419400	461490	641830	1767200	73350	306890	0	815410	349840	248710	148580	591100	0	568990	793250	147470	256630	403190	1083900	994420	488580	431080	258270	178440	646690	367830	277390	93482	153620	68925	0	0	1	1	0	2	2	1	1
SLIV_12940	D6EWA5	9.2482	F1	Actinorhodin polyketide synthase ACP	0	16105	9522.1	0	0	0	141130	0	0	0	0	0	0	0	0	0	0	0	0	0	0	0	0	195080	74069	0	0	40200000	52912000	32392000	31531000	31719000	27415000	0	163110	361860	439940	552910	0	1	1	0	0	0	1
SLIV_12945	D6EWA6	42.648	A	Actinorhodin polyketide putative beta-ketoacyl synthase 2 (EC 2.3.1.-)	0	0	0	0	0	0	0	0	0	0	0	0	0	0	0	0	0	0	0	0	0	0	0	0	0	0	0	73147	378220	161980	125180	85197	86703	0	0	0	0	0	0	0	0	0	0	0	0
SLIV_12995	D6EWB6	29.712	A	Uncharacterized protein	0	0	0	0	0	0	0	0	0	0	0	0	0	0	0	0	0	0	0	0	0	0	0	0	0	0	0	0	0	0	0	0	0	0	0	0	0	0	0	0	0	0	0	0	0
SLIV_13000	D6EWB7	14.422	A	PPOX class F420-dependent enzyme, MSMEG_5819/OxyR family (IPR024031)	0	0	0	0	0	0	0	0	0	0	0	0	0	0	0	0	0	0	0	0	0	0	0	0	0	0	0	1925100	1290400	1492800	497000	426630	816570	0	0	0	0	0	0	0	0	0	0	0	0
SLIV_13010	D6EWB9	31.486	A	Oxidoreductase	0	0	0	0	0	0	0	0	0	0	0	0	0	0	0	0	0	0	0	0	0	0	0	0	0	0	0	53445	202040	185570	60540	66857	89335	0	0	0	0	0	0	0	0	0	0	0	0
SLIV_13015	D6EWC0	23.134	X	Secreted protein (Sec) - Dehydratease	31833	0	0	15404	0	38290	31915	83935	101020	57435	17048	0	0	53856	44671	167260	28201	946860	44021	156240	229510	42796	38890	879940	815020	310860	272720	461200000	380450000	223710000	22829000	45431000	164790000	1988100	436910	1248500	1311300	665690	1	0	0	4	0	1	1
SLIV_23095	D6EWE8	85.758	X	Secreted protein (TAT) - Peptidase M6, InhA family protein	1880900	1861400	1902700	3319700	4413200	4729200	5785900	3778200	4171700	7094900	2400000	4570100	1156800	8636800	860640	506390	379040	2207000	783000	1886000	1350500	627640	657230	850110	3070800	4853600	1460300	19285000	8971300	7235400	3161900	8687800	7386000	2626400	1751400	1455700	2170300	1558700	23	22	22	23	24	26	28
SLIV_23130	D6EWF5	15.662	A	JAB1/MPN/MOV34 metalloenzyme	105560	93513	0	0	5976.2	100290	284420	306260	582060	822120	393810	959750	0	833520	277570	211900	67441	223890	26614	203530	513250	278890	387070	270440	603020	526480	269290	1355800	948840	258000	334640	363710	488860	0	0	77439	0	83349	1	1	0	0	1	1	2
SLIV_23135	D6EWF6	10.077	A	ThiamineS/Molybdopterin converting factor subunit 1 (IPR003749)	1324500	1118100	526060	804330	1788000	1605500	1874600	2430000	2496700	3914600	2752400	3036500	513630	3015500	443600	232840	159760	881890	568600	597070	386090	515600	200620	178630	1375000	749010	347410	2745600	3056000	622680	336450	892730	919180	672230	443110	68308	307720	188440	5	6	4	5	6	4	4
SLIV_23160	D6EWG2	7.904	A	Phosphotransferase system IIB component (Uncharacterized protein)	704090	707610	370530	1193700	1353100	1684100	1942000	1949100	706110	3624600	902290	2070700	0	3425600	1315000	1074700	532790	1455900	403970	1321400	1310900	512010	762400	807030	2938000	3015900	1254000	5824600	8036100	4315000	3884700	2760600	2817200	1135200	1308300	732470	1197000	1180400	2	1	1	2	2	2	2
SLIV_23230	D6EWH5	47.516	B	Integral membrane protein - Putative SGNH hydrolase-type esterase domain (IPR013830)	2522600	1896300	1668900	5026300	6607200	6825400	6406600	8558100	10281000	13272000	2789500	5767400	1849100	16068000	5276500	3251100	2379300	13586000	1589500	11691000	10944000	3623600	3529000	6176100	21472000	31194000	9268100	52983000	27111000	16056000	7900700	19734000	28236000	13402000	9283200	11478000	15808000	13063000	18	20	16	23	19	19	21
SLIV_23420	D6EWL0	38.103	A	Oxidoreductase	0	0	0	0	0	0	0	0	0	0	0	15574	0	0	21544	10699	0	6162.1	16798	5836	34153	0	18879	23027	125290	2659.2	39364	394440	203450	121770	62333	84284	168900	0	0	0	0	0	0	0	0	0	0	0	0
SLIV_23465	D6EWL9	35.989	E	Secreted lipoprotein (TAT) - Glucanase (EC 3.2.1.-)	23569	23657	20758	25604	47885	43080	65235	50552	40762	73254	43682	112160	9103.6	73464	73728	16053	11825	221720	163110	350030	97497	58392	48760	109910	259230	299200	69423	169130	138530	52624	10830	0	72173	19229	4112.3	48344	0	24969	2	2	2	2	2	2	2
SLIV_23470	D6EWM0	70.89	X	Secreted protein (Sec) - Galactose oxidase/kelch, beta-propeller (IPR011043) with Immunoglobulin E-set (IPR014756)	118550	191610	165070	241610	345670	277940	363680	278560	487180	382240	139640	383430	66716	491680	605550	472240	339960	1863800	405220	1546800	586570	314930	256810	543840	1758300	2324500	719370	1984500	1247100	709130	418360	675270	617690	538970	694750	512220	677160	569060	6	9	10	10	10	9	11
SLIV_23525	D6EWM9	33.078	X	Secreted protein (TAT) - Amino acid ABC transporter substrate-binding protein	0	0	0	0	0	0	0	0	0	0	0	0	0	30820	0	0	0	73698	0	78010	29292	0	0	41181	207730	182800	66491	616290	210130	148160	33718	79212	131200	0	28564	0	0	0	0	0	0	0	0	0	0
SLIV_33515	D6EWU5	50.23	A	Oxidoreductase	0	0	0	4645.6	0	0	0	0	0	0	0	0	0	0	0	10039	0	0	0	0	46096	0	0	0	0	0	43085	290850	0	247240	191240	121710	191560	0	0	0	0	0	0	0	0	1	0	0	0
SLIV_33670	D6EWX7	21.13	A	Aldolase	14803	0	0	0	0	47941	0	89438	56555	0	0	43561	0	0	24858	65158	23023	116750	48553	0	75126	0	0	0	358160	380380	74087	1092100	747820	430020	342540	303100	322800	0	0	0	0	0	1	0	0	0	0	1	0
SLIV_33905	D6EX25	47.561	A	Proline iminopeptidase (EC 3.4.11.5)	14448	7044.3	7756.2	22988	0	0	0	46641	84045	0	0	0	0	0	120640	63651	44418	201240	0	99341	131260	32831	56280	117320	273360	303330	54857	350400	243530	161820	80905	194980	129470	54014	25705	0	47238	39918	1	1	1	1	0	0	0
SLIV_03035	D6EXD5	54.882	A	Regulatory protein	29199	18333	14609	37810	40085	74560	70267	82279	93797	89816	0	172910	225530	264720	50231	54011	38423	63286	0	79332	83004	49589	40912	57774	129860	81373	44099	59376	81296	24083	11917	8879.7	23278	65048	74590	0	57075	24926	1	1	1	1	1	1	1
SLIV_03130	D6EXF5	98.153	X	Secreted protein (Sec) - Alpha/Beta hydrolase fold protein (IPR029058)	2259300	1951600	1620300	2470900	3565600	3506200	3607600	5915500	5075500	6222400	3005100	5576500	2189200	6227100	2287700	1839000	1165700	6066200	2736400	6145500	3291200	1734500	1511100	2177300	6445200	9779400	3224000	7597700	6115900	3426400	2934200	2033100	2388700	3187200	2175300	1266900	2366800	2484500	31	29	32	37	33	38	37
SLIV_13145	D6EXI6	19.077	B	Integral membrane protein of unknown function (DUF4245 family)	182940	131270	0	383450	257150	437080	452320	865630	531000	558260	216820	629910	0	872410	170430	202260	216400	336950	34455	430060	341140	239160	174570	212910	653150	380320	339620	226050	0	130890	0	0	68218	156130	297570	0	0	0	2	2	0	3	3	2	2
SLIV_13230	D6EXK3	19.001	A	Alkyl hydroperoxide reductase AhpD	0	0	0	0	0	0	0	0	0	0	0	0	0	0	0	0	7865.5	71391	0	0	80109	0	9612.5	35405	242460	153890	114290	1116100	780440	127660	139750	140160	293480	0	0	0	0	0	0	0	0	0	0	0	0
SLIV_13270	D6EXL1	36.384	X	Secreted protein (Sec) - Unknown function	99484	164870	228190	361710	471600	485410	616430	519820	130240	55489	247980	428140	316980	479090	388180	139010	58711	1018000	561000	1166600	694530	488690	219440	277260	1196500	1793200	692520	1904400	743020	429060	249440	1093500	1311900	790320	385340	576070	913880	942160	3	5	3	5	4	4	5
SLIV_13275	D6EXL2	23.422	E	Secreted Lipoprotein (Sec) - Unknown function	272030	265500	230670	422070	475280	423360	629600	218690	220940	285330	304940	932300	290170	254770	305960	221460	196440	1205400	341180	930520	711100	341370	277900	336690	1688800	2015000	1118300	3874700	2199600	2392600	721210	2998100	4524400	1056700	527840	1149700	1300000	1073800	3	5	4	5	5	3	5
SLIV_13280	D6EXL3	23.035	E	Secreted Lipoprotein (Sec) - Unknown function	0	0	0	0	0	47127	0	202000	186820	0	0	301300	0	0	23371	0	31330	104590	0	74650	0	26423	36863	52870	156760	228300	62013	0	0	0	0	0	0	0	0	0	0	0	0	0	0	0	0	1	0
SLIV_13360	D6EXM9	25.362	X	Secreted protein (Sec) - Flp pilus assembly protein CpaB	21347	72150	12684	94751	120640	89974	143060	0	87564	102420	30475	92657	0	135680	28178	28637	23876	190810	44594	96324	40810	16356	0	83822	85924	0	0	0	37408	0	0	0	46468	0	0	26369	0	0	1	2	1	2	2	1	2
SLIV_13415	D6EXN9	44.442	B	Integral membrane protein of unknown function	7481.5	12243	6233.6	16481	16599	51807	53310	239140	96144	373950	38113	163830	74390	135210	150310	35798	192730	414580	64206	248640	79839	22183	195230	209980	251780	684050	218790	1182300	271970	655840	353240	670390	872680	134970	42176	15166	18986	117780	1	1	2	2	2	4	3
SLIV_13465	D6EXP9	29.295	X	Secreted protein (Sec) - Secreted Peptidase S1, PA clan (IPR009003)	0	0	6620.9	10610	13515	37152	27447	0	0	0	0	0	0	0	0	2496.7	0	26144	0	0	0	0	0	0	0	0	0	22472000	11545000	7125300	3034200	9317500	12687000	0	49890	0	32710	34318	0	0	1	1	1	1	1
SLIV_13555	D6EXR6	33.164	A	Mycothiol S-conjugate amidase (EC 3.5.1.115)	25362	14028	12171	13563	0	0	20221	0	20169	55835	16395	0	0	65725	100360	65295	73732	403180	0	293910	260100	145010	144510	234360	703280	748840	322000	904490	493340	435170	208300	362520	342910	7839.8	0	0	0	0	1	1	1	2	0	0	1
SLIV_13560	D6EXR7	14.276	B	Integral membrane protein of unknown function	310710	239940	232430	408040	432710	476790	483000	258830	628260	730020	309310	1107400	270590	686010	471400	271270	249490	661380	616730	751740	897550	536790	259900	308280	1294700	1508000	734890	431410	0	0	0	0	149820	141100	0	77007	0	46802	4	4	4	4	4	4	4
SLIV_13565	D6EXR8	17.843	N	Transcription elongation factor GreA (Transcript cleavage factor GreA)	3375700	2103700	2797300	3687900	5078900	5352000	5220000	1161000	6241100	1773400	4644700	12250000	0	7356400	7100900	709080	337340	1897900	259630	1204800	2127100	473260	1080600	862420	3529800	5912100	1116300	691860	44648000	286530	11977000	0	0	104440	0	70009	109080	69281	2	2	2	2	3	1	2
SLIV_13610	D6EXS7	19.308	A	Peptide methionine sulfoxide reductase MsrA	29928	42193	26127	54862	63581	95879	317000	0	57818	193830	0	338570	0	66258	60488	0	44652	192320	35284	336570	47685	79961	66795	96219	770170	925610	365400	3703400	1917400	2049600	760210	1219200	3198600	0	0	51792	66531	43017	1	2	1	1	1	1	2
SLIV_13615	D6EXS8	43.182	X	Secreted protein (Sec) - ATP/GTP-binding protein with Tachylectin 2 domain (IPR023294)	5779200	5708300	4178700	10929000	12229000	14596000	15636000	13735000	14142000	20714000	4061800	8126600	889810	28961000	10483000	7813200	6494000	17607000	1663300	18692000	13088000	8642300	6381500	9050800	26145000	24510000	10258000	2587500	2577400	962550	590470	696900	949060	4380300	14035000	4733000	6695500	6136700	11	11	12	13	14	12	14
SLIV_23675	D6EXV4	49.32	X	Secreted protein (Sec) - Glycoside hydrolase superfamily protein (IPR017853)	0	0	0	0	0	0	0	0	0	0	0	0	0	548010	0	9802.1	10992	24898	53266	25001	0	0	0	18982	108400	61413	17833	180490	169450	100120	50409	232850	272410	238380	51534	255500	291860	242350	0	0	0	0	0	0	0
SLIV_23775	D6EXX3	36.642	E	Secreted lipoprotein (TAT) - ABC transporter periplasmic binding domain	14526	140460	98591	132810	180930	134570	199520	328340	376310	301250	16119	314740	0	524160	128900	173360	100800	272520	259750	499350	90279	108340	115190	88301	372030	770880	294130	1704100	1176100	315620	329350	721280	1273500	1079200	496790	599190	864380	894820	1	3	3	3	3	3	3
SLIV_23820	D6EXY2	28.389	A	Putative phosphatase (EC 3.1.3.-)	16192	5848.4	0	28214	28314	40346	19099	64914	64746	114150	0	0	0	87228	183760	106720	113680	74918	0	240840	345510	157390	190500	211030	229350	218780	118780	463640	0	467730	109340	194130	499900	82467	39402	0	0	37563	1	1	0	1	1	1	1
SLIV_23825	D6EXY3	34.302	A	Guanidinobutyrase (EC 3.5.3.7)	0	0	0	0	0	0	0	0	0	0	0	0	0	0	56337	0	7508.8	59829	0	0	0	0	10909	19473	73188	109160	61617	223010	118730	95281	89533	128420	154150	0	0	0	0	0	0	0	0	0	0	0	0
SLIV_23870	D6EXZ2	53.498	X	Secreted protein (Sec) - Prolyl tri/tetrapeptidyl aminopeptidase (EC 3.4.11.-) (Tripeptidyl aminopeptidase)	431390	209950	358190	249290	419160	592080	500590	1197900	1506900	1073000	467080	1148300	82732	1304900	323400	285440	190200	512550	18408	437800	395740	264760	156340	196310	518150	588370	224800	144380	436770	85864	34591	31555	42697	767390	516990	449730	557600	422570	4	3	4	2	3	4	3
SLIV_23990	D6EY17	47.744	F1	Citrate synthase	32536	101710	85878	211550	284520	202900	373080	170530	370410	135860	56167	116920	12781	281610	810090	301540	241600	997720	696930	798060	772320	341780	374000	712660	1392600	2734600	1593600	4949400	2743900	2211700	1006800	2143400	2121100	0	100820	224200	303500	156220	2	4	3	4	4	3	5
SLIV_24265	D6EY70	47.943	B	Integral membrane protein - Protein with phospholipase C, C-terminal domain (IPR008475) and LPXTG cell wall anchor domain (IPR019931)	1043700	1237000	1126800	2371400	2592900	3580800	3493700	2494600	4296800	6212300	1938800	4201500	1393900	6295500	2569900	1683600	1097300	4343500	979770	7372600	4496900	2738300	2079700	2922000	7988200	10882000	4503800	5645800	4076000	2669400	1649100	2888300	3510400	6778700	3769200	4322100	4597600	3050300	9	9	8	11	10	10	15
SLIV_24290	D6EY75	61.554	F1	Putative ABC transporter ATP-binding protein	4488000	6441400	2831500	6747700	6106100	7853900	7864300	12062000	13656000	10474000	21190	18560000	3127800	20012000	5507400	4969100	4663400	9501200	3664300	7667500	5511900	3441500	3084700	4140000	10267000	8523700	4395100	10611000	10586000	6278800	2862500	3723000	5086700	11555000	10684000	10426000	13530000	13798000	3	2	2	3	2	3	3
SLIV_33990	D6EY90	8.3554	A	Uncharacterized protein	0	0	0	0	0	0	0	0	0	0	127640	0	0	0	140910	0	0	0	90395	0	0	191310	0	0	0	0	0	685490	0	129490	103760	0	0	0	204210	0	0	175570	0	0	0	0	0	0	0
SLIV_34120	D6EYB7	14.433	X	Secreted protein (Sec) - Probable subtilase-type protease inhibitor	107360000	197510000	158200000	235900000	236620000	1165800000	298430000	646950000	498880000	2327000000	272340000	1018200000	245590000	2256200000	418230000	327260000	542600000	1466500000	383890000	1964500000	1999000000	674620000	789070000	1300100000	2279300000	2148100000	834270000	4194800000	3310700000	2781400000	1168900000	2742000000	2098500000	1295700000	560360000	609210000	252260000	91899000	9	9	13	12	11	13	13
SLIV_34190	D6EYD1	20.178	A	Hydrolase - Isochorismatase-like hydrolase (IPR000868)	0	0	0	0	0	9421.8	0	0	0	0	0	0	0	0	8319.2	0	13036	31176	0	21147	0	0	10254	0	38191	0	25612	55416	0	20482	6768.2	10248	14250	0	0	0	0	0	0	0	0	0	0	1	0
SLIV_34230	D6EYD9	22.356	A	Hydrolase	20935	13190	13331	71762	20347	0	15769	0	0	0	45687	0	22390	258650	26529	141440	166640	878580	33357	848350	949090	352210	293080	380210	1727000	2164900	1028300	2823500	663790	839000	540790	1266300	1199700	0	59868	0	0	0	1	1	1	2	1	0	1
SLIV_34335	D6EYG0	52.113	B	Integral membrane protein of unknown function	0	0	0	0	0	0	0	0	0	25966	0	0	0	29852	0	0	0	0	0	0	0	0	0	0	0	0	0	0	0	0	0	0	0	0	0	0	0	0	0	0	0	0	0	0	0
[truncated: 69 more columns]

## Sheet: Table-S7_Diff_abundant proteins
Table S6: Differentially abundant proteins (filtered only to secreteory proteins)					Frequency of identification						Pairwise comparison, WT vs Mutant
GeneID	Uniprot_acc	SToPSdb	Protein name	Keywords	TK24.WT_set1	TK24.WT_set2	delta.12280_set1	delta.12285_set1	delta.12645_set1	delta.17315_set1	TK24.WT_set1 vs delta.sigH.operon	TK24.WT_set1 vs delta.sigH.operon_pAdj	Log2_fold TK24.WT_set1 vs delta.sigH.operon	TK24.WT_set1 vs delta.sigB.operon	TK24.WT_set1 vs delta.sigB.operon_pAdj	log2_fold TK24.WT_set1 vs delta.sigB.operon	TK24.WT_set1 vs delta.12280	TK24.WT_set1 vs delta.12280_pAdj	log2_fold TK24.WT_set1 vs delta.12280	TK24.WT_set1 vs delta.12285	TK24.WT_set1 vs delta.12285_pAdj	log2_fold TK24.WT_set1 vs delta.12285	TK24.WT_set1 vs delta.12645	TK24.WT_set1 vs delta.12645_pAdj	log2_fold TK24.WT_set1 vs delta.12645	TK24.WT_set1 vs delta.17315	TK24.WT_set1 vs delta.17315_pAdj	log2_fold TK24.WT_set1 vs delta.17315
SLIV_13015	D6EWC0	X	Secreted protein (Sec) - Dehydratease	Sec substrate; lyase; dehydratase	4	5	6	7	6	5	Mutant_abundant	0.000483861	-7.12866	Mutant_abundant	0.0452097	-5.7	non-significant	0.204065	-2.97725	Mutant_abundant	0.0311692	-3.65543	Mutant_abundant	7.52215e-06	-12.8475	Mutant_abundant	0.00037558	-5.26643
SLIV_26635	A0A076MBH5	X	Secreted protein (Sec) - Putative secreted protein of unknown function	Sec substrate; unknown function	7	7	6	7	6	5	Mutant_abundant	0.0025232	-2.92025	Mutant_abundant	0.0157411	-3.02883	non-significant	0.189971	-0.950854	Mutant_abundant	0.00467469	-2.04645	Mutant_abundant	7.68332e-05	-4.37917	Mutant_abundant	0.000198428	-3.2851
SLIV_09735	D6EP98	X	Secreted protein (Sec) - glutamate binding protein	Sec substrate; solute binding protein; membrane transport system; ABC transporter system; transport	7	7	6	7	6	5	Mutant_abundant	0.0113183	-1.30741	Mutant_abundant	0.0281198	-1.32339	Mutant_abundant	0.00197816	-3.40832	Mutant_abundant	0.000792823	-4.08889	Mutant_abundant	9.03723e-07	-5.47913	Mutant_abundant	5.06333e-05	-3.23258
SLIV_07815	D6ELP2	E	Secreted Lipoprotein (Sec) - ABC-type glycine betaine transport system, substrate-binding protein	Sec substrate; lipoprotein; transporter; ABC transporter complex; membrane transport system; transport	5	4	5	6	6	4	non-significant	0.131537	-1.48597	non-significant	0.167691	-1.34887	non-significant	0.148209	-1.1267	Mutant_abundant	0.0232351	-3.94889	Mutant_abundant	8.19106e-06	-5.97431	Mutant_abundant	0.0127218	-2.67492
SLIV_21065	D6ERU7	E	Secreted Lipoprotein (Sec) - Glycine-rich secreted protein	Sec substrate; lipoprotein; unknown function	6	0	5	5	6	5	non-significant	0.0759344	-2.20107	Mutant_abundant	0.0406555	-2.46854	non-significant	0.135696	-1.79748	Mutant_abundant	0.0126089	-1.94773	Mutant_abundant	3.57812e-05	-4.49809	Mutant_abundant	0.00201426	-2.65649
SLIV_35470	D6EES1	E	Secreted Lipoprotein (Sec) - Iron-siderophore binding lipoprotein	Sec substrate; lipoprotein; Iron-siderophore binding; ABC transporter family; transport	7	7	6	7	6	5	non-significant	0.132529	-1.70204	non-significant	0.0606096	-2.27485	non-significant	0.339851	-0.722506	Mutant_abundant	0.0378404	-2.13728	Mutant_abundant	0.000903793	-3.85048	Mutant_abundant	0.0251942	-2.33204
SLIV_06170	D6EI87	X	Secreted protein (Sec) - Peptide/nickel binding protein, MppA-type (IPR030678)	Sec substrate; solute binding protein; ABC transporter complex; membrane transport system; transport	7	7	6	7	6	5	non-significant	0.165814	-1.35648	non-significant	0.0606096	-1.72013	non-significant	0.0667187	-1.47583	Mutant_abundant	0.00539984	-2.32611	Mutant_abundant	2.33846e-05	-3.89828	Mutant_abundant	0.00397496	-2.06834
SLIV_35895	A0A076MKC1	X	Secreted protein (Sec) - Spore-associated protein A	Sec substrate; sporulation; germination; housekeeping function	7	7	6	7	6	5	non-significant	0.0831986	-1.24979	non-significant	0.217563	-1.02116	non-significant	0.0901862	-1.06449	Mutant_abundant	0.00416633	-1.81325	Mutant_abundant	1.8663e-06	-4.65146	Mutant_abundant	0.00169613	-2.02271
SLIV_19760	D6EPC0	E	Secreted Lipoprotein (Sec) - Unknown function	Sec substrate; lipoprotein; unknown function	7	7	6	7	6	5	Mutant_abundant	0.00666736	-2.48268	Mutant_abundant	0.0059879	-2.83005	Mutant_abundant	0.0125213	-1.60757	Mutant_abundant	0.0255378	-2.51961	Mutant_abundant	1.11767e-06	-5.21837	Mutant_abundant	0.0127218	-2.0221
SLIV_21580	D6ES51	X	Secreted protein (Sec) - Phospholipase A2 domain protein (IPR016090)	Sec substrate; hydrolase; phospholipase; housekeeping function	6	6	6	7	6	5	Mutant_abundant	0.00501319	-4.41634	non-significant	0.762548	-0.765773	Mutant_abundant	0.0286621	-3.40786	Mutant_abundant	0.0044565	-4.1631	Mutant_abundant	1.56487e-06	-9.37503	Mutant_abundant	0.0313879	-1.97746
SLIV_05285	A0A076M305	E	Secreted Lipoprotein (Sec) - Solute binding lipoprotein	Sec substrate; lipoprotein; ABC transport; transmembrane transport; transport	6	7	6	7	6	5	non-significant	0.640704	-1.40227	non-significant	0.053287	-3.26906	Mutant_abundant	0.0310743	-2.23319	Mutant_abundant	0.00399369	-2.57833	Mutant_abundant	1.24855e-05	-3.80102	Mutant_abundant	0.0379095	-1.84439
SLIV_09625	D6EP75	X	Secreted protein (Sec) - Peptidase S1, PA clan (IPR009003)	Sec substrate; hydrolase; peptidase; proteolysis; metal binding; hydrolysis of environmental macromolecules	7	7	6	7	6	5	non-significant	0.0620843	-1.59119	non-significant	0.0872785	-1.62268	non-significant	0.130199	-1.31886	Mutant_abundant	0.0230917	-2.18194	Mutant_abundant	1.0389e-05	-4.60166	Mutant_abundant	0.0134545	-1.78653
SLIV_06395	D6EID2	X	Secreted protein (Sec) - Gamma-glutamyltransferase	Sec substrate; glutathione metabolic process; oxidation-reduction process; housekeeping function	7	5	6	6	6	5	non-significant	0.990439	-0.178653	non-significant	0.832947	-0.381813	non-significant	0.467933	0.0796815	Mutant_abundant	0.0324167	-1.32193	Mutant_abundant	1.8448e-05	-5.68302	Mutant_abundant	0.0251942	-1.78543
SLIV_04955	D6EFA1	X	Secreted protein (Sec) - Soluble quinoprotein glucose/sorbosone dehydrogenase	Sec substrate; oxidoreductase; oxidation-reduction process; metabolic process	7	5	6	7	6	5	non-significant	0.101568	-1.38061	Mutant_abundant	0.024709	-1.87247	non-significant	0.674268	-1.43444	Mutant_abundant	0.0236192	-2.10968	Mutant_abundant	6.71056e-05	-4.22637	non-significant	0.0683827	-2.42592
SLIV_34120	D6EYB7	X	Secreted protein (Sec) - Probable subtilase-type protease inhibitor	Sec substrate; proteinase inhibitor; housekeeping function	7	7	6	7	6	5	non-significant	0.707287	-0.114218	non-significant	0.181288	-1.47293	non-significant	0.126295	-1.31081	Mutant_abundant	0.00361344	-2.06253	Mutant_abundant	0.000140889	-2.98594	non-significant	0.486208	-2.0221
SLIV_35720	D6EEX1	X	Secreted protein (Sec) - Unknown function	Sec substrate; unknown function	3	1	6	5	6	3	non-significant	0.843504	0.481404	non-significant	0.267523	-1.00983	non-significant	0.461148	-1.63949	Mutant_abundant	0.0181376	-2.75351	Mutant_abundant	0.000191637	-5.78583	non-significant	0.124019	-1.48141
SLIV_15640	A0A076LYY4	E	Secreted Lipoprotein (Sec) - Unknown function	Sec substrate; lipoprotein; unknown function	7	7	6	7	6	5	non-significant	0.0867948	-1.30445	non-significant	0.19118	-1.38711	non-significant	0.354933	-0.982603	Mutant_abundant	0.0102287	-1.89228	Mutant_abundant	5.63485e-05	-4.0123	non-significant	0.10212	-1.11045
SLIV_19735	D6EPB5	X	Secreted protein (Sec) - Glycoside hydrolase/deacetylase	Sec substrate; hydrolase; carbohydrate binding; glycoside hydrolase; hydrolysis of environmental macromolecules	7	7	6	7	6	5	non-significant	0.0867948	-1.99482	non-significant	0.226769	-1.1978	non-significant	0.0609199	-1.87083	Mutant_abundant	0.0196034	-2.68526	Mutant_abundant	4.02638e-06	-4.00768	non-significant	0.0491783	-0.945663
SLIV_20995	D6EQT0	E	Secreted Lipoprotein (Sec) - Lipoprotein CseA	Sec substrate; lipoprotein; cell envelope stress; housekeeping function	7	7	6	7	6	5	non-significant	0.173824	-0.93372	non-significant	0.0867965	-1.46639	non-significant	0.251705	-1.01571	Mutant_abundant	0.00669152	-1.9698	Mutant_abundant	0.00695267	-1.34885	non-significant	0.019988	-0.931558
SLIV_29470	D6ENK2	E	Secreted Lipoprotein (Sec) - Oligopeptide binding protein	Sec substrate; lipoprotein; solute-binding protein; transmembrane transport; membrane transport system; transport	7	7	6	7	6	5	non-significant	0.0705758	-1.10145	non-significant	0.0964598	-0.991474	Mutant_abundant	0.0297462	-1.23833	Mutant_abundant	0.00864979	-1.97414	Mutant_abundant	0.000933526	-2.17067	non-significant	0.00411983	-0.919218
SLIV_23470	D6EWM0	X	Secreted protein (Sec) - Galactose oxidase/kelch, beta-propeller (IPR011043) with Immunoglobulin E-set (IPR014756)	Sec substrate; oxidoreductase; oxidation-reduction process; unknown function	7	7	6	7	6	5	non-significant	0.0553859	-1.37701	Mutant_abundant	0.0255865	-1.85438	Mutant_abundant	0.0292742	-1.84115	Mutant_abundant	0.0213538	-1.93236	Mutant_abundant	0.00123587	-1.95213	non-significant	0.00397496	-0.818681
SLIV_29775	D6ENR6	X	Secreted protein (TAT) - Glycosyl hydrolase-like 10 (IPR003790) (UPFUPF0748-like protein)	TAT substrate; hydrolase; carbohydrate binding; hydrolysis of environmental macromolecules	7	7	6	7	6	5	non-significant	0.164109	-0.799753	non-significant	0.107297	-1.2994	non-significant	0.468128	-0.707153	Mutant_abundant	0.0394583	-1.5914	Mutant_abundant	0.000639609	-2.43334	non-significant	0.325437	-0.810087
SLIV_13240	A0A076M061	X	Secreted protein (Sec) - Protein containing Lysozyme-like domain (IPR023346)	Sec substrate; hydrolase; cell-wall biosynthesis; housekeeping function	7	7	6	7	6	5	non-significant	0.185448	-1.20723	non-significant	0.279912	-1.00769	non-significant	0.179661	-1.36506	Mutant_abundant	0.0385909	-2.16773	Mutant_abundant	0.0355124	-1.76305	non-significant	0.019044	-0.808665
SLIV_08090	A0A076M0X2	E	Secreted Lipoprotein (Sec) - Solute binding lipoprotein	Sec substrate; lipoprotein; solute binding protein; membrane transport system; transport	7	7	6	7	6	5	non-significant	0.214679	-1.01709	non-significant	0.211399	-0.911838	Mutant_abundant	0.0174307	-1.5899	Mutant_abundant	0.00278099	-2.0121	Mutant_abundant	7.71788e-05	-3.70536	non-significant	0.0683827	-0.737208
SLIV_18490	D6EM43	E	Secreted Lipoprotein (Sec) - Putative Copper chaperone SCO1/SenC (IPR003782)	Sec substrate; lipoprotein; chaperone; respiratory chain; energy; housekeeping function	7	7	6	7	6	5	non-significant	0.936912	0.0234159	non-significant	0.281549	-0.889897	non-significant	0.858497	-0.471785	Mutant_abundant	0.0339224	-1.54806	Mutant_abundant	0.00204281	-1.73605	non-significant	0.00201426	-0.650492
SLIV_05385	A0A076LZL8	X	Secreted protein (Sec) - Phosphodiester glycosidase (IPR018711) with Sporulation-related domain (IPR007730)	Sec substrate; phosphodiesterase; hydrolase; sporulation; germination; housekeeping function	7	7	6	7	6	5	non-significant	0.174096	-0.58513	non-significant	0.393337	-0.678777	non-significant	0.148209	-0.795684	Mutant_abundant	0.00830609	-1.51173	Mutant_abundant	0.00140878	-1.38439	non-significant	0.0079025	-0.633647
SLIV_27875	D6EKF1	X	Secreted protein (Sec) - Putative phosphodiesterase (IPR017946)	Sec substrate; hydrolase; phopshodiesterase; housekeeping function	7	7	6	7	6	5	non-significant	0.0867948	-1.16181	non-significant	0.0637994	-1.42799	non-significant	0.163668	-1.23377	Mutant_abundant	0.00754377	-2.04045	Mutant_abundant	0.0111	-1.41481	non-significant	0.10212	-0.499136
SLIV_35415	D6EER0	X	Secreted protein (TAT) - Soluble quinoprotein glucose/sorbosone dehydrogenase	TAT substrate; carbohydrate binding; catalytic function; dehydrogenase; unknown function	7	7	6	7	5	5	non-significant	0.250135	0.675998	non-significant	0.93549	-0.145756	non-significant	0.436274	-1.09573	Mutant_abundant	0.00669152	-2.07693	Mutant_abundant	0.0132396	-1.34947	non-significant	0.0735262	-0.478117
SLIV_37195	A0A076ML10	X	Secreted protein (Sec) - Protein containing Alpha/Beta hydrolase fold (IPR029058)	Sec substrate; hydrolase; hydrolysis of environmental macromolecules	7	7	6	7	6	5	non-significant	0.529073	-0.748787	non-significant	0.119235	-1.54914	non-significant	0.166411	-1.2996	Mutant_abundant	0.0108116	-2.49821	Mutant_abundant	0.00401059	-2.41462	non-significant	0.133623	-0.470736
SLIV_27710	D6EKB6	X	Secreted protein (Sec) - Protein with Lysozyme-like domain (IPR023346)	Sec substrate; hydrolase; peptidoglycan binding; unknown function	7	7	6	7	6	5	non-significant	0.324716	-0.6481	non-significant	0.214417	-1.03434	non-significant	0.22198	-0.928326	Mutant_abundant	0.0153496	-1.67072	Mutant_abundant	0.00148888	-1.87622	non-significant	0.524324	-0.441072
SLIV_22430	D6EUV9	X	Secreted protein (Sec) - Esterase	Sec substrate; hydrolase; peptidase; proteolysis; serine-type peptidase activity; hydrolysis of environmental macromolecules	7	7	6	7	6	5	non-significant	0.142177	-1.01186	non-significant	0.140913	-1.13391	non-significant	0.316399	-1.09902	Mutant_abundant	0.0222577	-1.70409	Mutant_abundant	0.000210052	-2.57891	non-significant	0.111917	-0.415182
SLIV_01600	D6EUA9	X	Secreted protein (TAT) - Glycoside hydrolase, family 43 (IPR006710)	TAT substrate; hydrolase; carbohydrate binding; glycoside hydrolase; hydrolysis of environmental macromolecules	7	6	6	7	6	5	non-significant	0.49741	-1.38194	non-significant	0.358211	-1.39934	non-significant	0.202684	-0.767597	Mutant_abundant	0.0143362	-2.5614	Mutant_abundant	0.0160712	-2.01717	non-significant	0.335912	-0.350927
SLIV_07595	D6EKU8	X	Secreted protein (Sec) - Esterase	Sec substrate; hydrolase; peptidase; proteolysis; serine-type peptidase activity; hydrolysis of environmental macromolecules	7	7	6	7	6	5	non-significant	0.0831986	-1.25381	non-significant	0.0759469	-1.29625	non-significant	0.46481	-0.777684	Mutant_abundant	0.021019	-1.57644	Mutant_abundant	0.0100439	-1.56091	non-significant	0.166432	-0.341054
SLIV_11200	D6ET10	X	Secreted protein (TAT) - Unknown function	TAT substrate; unknown function	7	5	6	7	6	5	non-significant	0.24005	-0.898712	Mutant_abundant	0.0362301	-2.0994	Mutant_abundant	0.0174307	-2.48676	Mutant_abundant	0.000845844	-3.73915	Mutant_abundant	8.17613e-05	-3.7706	non-significant	0.54325	-0.297039
SLIV_20155	D6EPK0	X	Secreted protein (Sec) - Unknown function DUF3515 (IPR021903)	Sec substrate; unknown function	6	4	6	6	3	5	non-significant	0.214679	-0.977744	non-significant	0.211633	-0.641502	Mutant_abundant	0.0108061	-1.25348	Mutant_abundant	0.00512686	-1.73091	Mutant_abundant	0.00996018	-1.3397	non-significant	0.0230009	-0.0352923
SLIV_09630	D6EP76	X	Secreted protein (TAT) - Peptidase S1, PA clan (IPR009003)	TAT substrate; hydrolase; peptidase; proteolysis; metal binding; hydrolysis of environmental molecules	7	7	6	7	6	5	non-significant	0.0705758	-1.41146	non-significant	0.0967948	-1.29373	non-significant	0.0951166	-1.23209	Mutant_abundant	0.00465378	-1.9109	Mutant_abundant	9.03723e-07	-4.5837	non-significant	0.654928	0.0344559
SLIV_31940	D6ESI4	P	Secreted protein (TAT) - Amidase	TAT substrate; peptidoglycan binding; cell-wall biosynthesis; housekeeping function	7	7	6	7	6	5	non-significant	0.155341	-0.949897	Mutant_abundant	0.0406878	-1.83984	non-significant	0.703928	-1.59363	Mutant_abundant	0.00602854	-2.09771	Mutant_abundant	0.00148888	-2.92664	non-significant	0.50605	0.0712709
SLIV_08650	D6EMX7	X	Secreted protein (TAT) - Thioredoxin-like protein	TAT substrate; redox homeostasis; metabolic process	6	6	6	7	6	5	non-significant	0.597272	-0.439587	non-significant	0.13849	-1.21556	non-significant	0.300193	-1.53503	Mutant_abundant	0.00502848	-2.75025	Mutant_abundant	0.000639609	-3.08099	non-significant	0.0651739	0.172396
SLIV_15730	A0A076M5F1	X	Secreted protein - T7SS ESAT-6-like protein (EsxA) (IPR010310)	T7 substrate; virulence;	7	7	6	7	6	5	Mutant_abundant	0.00249167	-2.29945	Mutant_abundant	0.00065397	-3.63711	Mutant_abundant	0.0164077	-1.37212	Mutant_abundant	0.00683771	-2.44632	Mutant_abundant	7.40566e-06	-3.97313	non-significant	0.476526	0.210654
SLIV_18370	A0A076M6S9	X	Secreted protein (Sec) - Subtilisin inhibitor (IPR023549)	Sec substrate; proteinase inhibitor; housekeeping function	7	7	6	7	6	5	non-significant	0.128737	-0.940054	Mutant_abundant	0.0139665	-2.44382	non-significant	0.892933	-0.517057	Mutant_abundant	0.0192759	-1.72389	Mutant_abundant	0.00217517	-1.96895	non-significant	0.111683	0.41373
SLIV_37320	D6EJ99	X	Secreted protein (TAT) - Unknown function	TAT substrate; unknown function	7	7	6	7	6	5	non-significant	0.165814	-1.47392	Mutant_abundant	0.044363	-2.94764	non-significant	0.242205	-1.64064	Mutant_abundant	0.00669152	-2.50189	Mutant_abundant	0.00140878	-2.76624	non-significant	0.78878	0.463209
SLIV_30780	D6EQU5	P	Secreted protein (Sec) - D-alanyl-D-alanine dipeptidase (D-Ala-D-Ala dipeptidase) (EC 3.4.13.22)	Sec substrate; hydrolase; peptidase; proteolysis; serine-type peptidase activity; cell-wall biosynthesis; housekeeping function	7	6	6	7	6	5	non-significant	0.407889	-1.34047	non-significant	0.335945	-1.64049	non-significant	0.366305	-1.33394	Mutant_abundant	0.0472282	-2.08721	Mutant_abundant	7.52215e-06	-6.38814	non-significant	0.367662	0.924185
SLIV_13865	D6ECH2	X	Secreted protein (Sec) - Unknown function	Sec substrate; unknown function	7	3	6	7	5	5	non-significant	0.0768047	-1.62423	Mutant_abundant	0.00389515	-3.82729	Mutant_abundant	0.0180605	-2.29625	Mutant_abundant	0.00220022	-2.57277	Mutant_abundant	0.00731041	-1.96279	non-significant	0.689601	1.20931
SLIV_21720	D6ETD1	E	Secreted lipoprotein (TAT) - L,D-transpeptidase catalytic domain (IPR005490) SbsA, Ig-like domain (IPR032812)	TAT substrate; lipoprotein; enzymatic activity; peptidoglycan binding	7	7	6	7	6	5	Mutant_abundant	0.018429	-1.97737	non-significant	0.136874	-1.11791	Mutant_abundant	0.0286621	-2.01649	Mutant_abundant	0.00465378	-2.67056	Mutant_abundant	0.000240342	-3.27656	non-significant	0.130831	3.34677
SLIV_11485	A0A076LZ26	X	Secreted protein (Sec) - Protein containing PepSY domain (IPR025711), possibly protease inhibitory function	Sec substrate; proteinase inhibitor; unknown function	7	7	6	7	6	5	non-significant	0.972406	-0.00690132	non-significant	0.997098	-0.0960133	non-significant	0.435903	-0.802757	Mutant_abundant	0.0331695	-1.28966	non-significant	0.962926	-0.222276	non-significant	0.0045965	-0.941155
SLIV_23465	D6EWL9	E	Secreted lipoprotein (TAT) - Glucanase (EC 3.2.1.-)	Tat substrate; lipoprotein; hydrolase; glucanase; recycling plant biomass; hydrolysis of environmental macromolecules; hydrolysis of environmental macromolecules	7	7	6	7	5	4	non-significant	0.105987	-1.40465	non-significant	0.514648	-0.805445	non-significant	0.318032	-1.966	Mutant_abundant	0.0104272	-1.91565	non-significant	0.213611	-1.31296	non-significant	0.280295	-0.556206
SLIV_15530	D6EFN4	X	Secreted protein (Sec) - Unknown function	Sec substrate; unknown function	7	7	6	7	6	5	non-significant	0.351776	-0.748323	non-significant	0.052579	-2.23802	non-significant	0.492372	-1.44293	Mutant_abundant	0.00548281	-2.30098	non-significant	0.0922252	-1.5761	non-significant	0.0491783	-0.370855
SLIV_27590	A0A076MFW2	X	Secreted protein (Sec) - Chitosanase (EC 3.2.1.132)	Sec substrate; hydrolase; chitinase; cell-wall biosynthesis; housekeeping function	7	7	6	7	6	5	non-significant	0.324739	-0.443616	non-significant	0.567537	0.163846	non-significant	0.632433	-0.417328	Mutant_abundant	0.0146342	-1.36988	non-significant	0.808317	-0.279723	non-significant	0.226618	-0.337002
SLIV_03135	A0A076LY96	E	Secreted Lipoprotein (Sec) - GerM protein	Sec substrate; lipoprotein; sporulation; germination; housekeeping function	7	7	6	7	6	4	non-significant	0.623536	-0.413383	non-significant	0.387521	-1.01138	non-significant	0.827152	-0.192546	Mutant_abundant	0.0381489	-1.3054	non-significant	0.970949	-0.137749	non-significant	0.105847	0.0468268
SLIV_11070	D6ESY4	X	Secreted protein (TAT) - N-acetylmuramoyl-L-alanine amidase	TAT substrate; amidase; peptidoglycan catabolic process; hydrolase; cell-wall biosynthesis	6	7	5	7	0	4	non-significant	0.78588	0.0854857	non-significant	0.497251	1.01956	non-significant	0.301534	-1.59331	Mutant_abundant	0.0152424	-3.17736	WT_unique			non-significant	0.545274	0.441733
SLIV_01150	A0A076M0P0	X	Secreted protein (TAT) - Endo-beta-N-acetylglucosaminidase H (EC 3.2.1.96)	TAT substrate; hydrolase; carbohydrate binding; metabolic enzyme; hydrolysis of environmental macromolecules	7	7	6	7	6	5	non-significant	0.289151	-1.42622	non-significant	0.524344	-0.501501	non-significant	0.221819	-1.40453	Mutant_abundant	0.0493595	-2.09003	Mutant_abundant	0.000138738	-2.88824	WT_abundant	0.00411983	1.77766
SLIV_29545	D6ENL9	E	Secreted lipoprotein (TAT) - Peptidyl-prolyl cis-trans isomerase	TAT substrate; lipoprotein; isomerase; protein folding; housekeeping function	7	7	6	7	6	5	Mutant_abundant	0.0145197	-2.24615	Mutant_abundant	0.0136833	-2.31115	non-significant	0.492372	-1.3075	Mutant_abundant	0.0158586	-2.53726	Mutant_abundant	0.00014296	-2.50201	WT_abundant	0.0251097
SLIV_29940	D6ENU9	E	Secreted Lipoprotein (Sec) - NlpA family (IPR004872)	Sec substrate; lipoprotein; D-methionine permease, binding protein, ATP-driven transport; membrane transport system; transport	7	7	6	7	6	5	Mutant_abundant	0.00625078	-2.7381	non-significant	0.40516	0.369025	Mutant_abundant	0.044705	-1.97659	Mutant_abundant	0.00416633	-2.20803	Mutant_abundant	0.000173915	-2.41983	WT_abundant	1.19148e-05
SLIV_04170	D6EDQ1	X	Secreted protein (Sec) - Glycosyl hydrolase	Sec substrate; hydrolase; carbohydrate binding; glycoside hydrolase; virulence	6	4	6	7	6	5	non-significant	0.237896	-2.37943	non-significant	0.233336	-2.93864	Mutant_abundant	0.00318097	-3.98358	Mutant_abundant	0.00259541	-4.05817	Mutant_abundant	0.0290374	-1.18371	WT_abundant	0.000291553
SLIV_35190	A0A076MA45	X	Secreted protein (Sec) - CAP domain containing protein (IPR014044)	Sec substrate; extracellular matrix moprhogenesis; unknown function	7	7	6	6	6	5	non-significant	0.347847	-0.992974	non-significant	0.646466	-0.687854	non-significant	0.975517	-0.88564	Mutant_abundant	0.04146	-1.25561	non-significant	0.583031	-0.535912	WT_abundant	0.0485639	1.66258
SLIV_07255	D6EKN4	X	Secreted protein (Sec) - Secreted Endonuclease/exonuclease/phosphatase (IPR005135) with PGAP2-interacting domain (IPR027317) - Cell wall related protein	Sec substrate; cell-wall biosynthesis, housekeeping function	7	7	6	7	6	5	non-significant	0.0705758	1.27584	non-significant	0.242578	0.29824	non-significant	0.600008	-0.614077	Mutant_abundant	0.0238403	-1.42509	non-significant	0.749984	-0.695283	WT_abundant	0.000207527	2.09762
SLIV_28755	D6ELM9	X	Secreted protein (Sec) - Sporulation stage 0, protein M (IPR009776)	Sec substrate; sporulation; germination; housekeeping function	7	5	6	7	6	1	non-significant	0.290352	-0.92736	non-significant	0.35535	-1.02489	Mutant_abundant	0.00197816	-2.56738	Mutant_abundant	0.000792823	-3.05661	Mutant_abundant	5.41383e-06	-5.18864	WT_unique		-2.13531
SLIV_03330	A0A076LYB1	X	Secreted protein (Sec) - Protein containing NmrA-like domain	Sec substrate; oxidoreductase; oxidation-reduction process; metabolic process	5	2	5	7	6	1	non-significant	0.618402	-0.49828	Mutant_abundant	0.044363	-1.67429	non-significant	0.0618391	-1.46364	Mutant_abundant	0.00314815	-2.04123	Mutant_abundant	6.20134e-05	-3.7417	WT_unique		-2.05152
SLIV_15920	A0A076M1H4	E	Secreted lipoprotein (TAT) - Glycoside hydrolase/deacetylase	TAT substrate; lipoprotein; hydrolase, carbohydrate metabolic process; metabolic process	7	6	6	6	4	1	non-significant	0.279671	-1.15553	non-significant	0.614892	0.0911306	non-significant	0.330788	-2.11212	Mutant_abundant	0.0265964	-3.12189	non-significant	0.722298	-0.951906	WT_unique		-1.74476
SLIV_04825	A0A076LZ58	X	Secreted protein (Sec) - Carboxypeptidase	Sec substrate; hydrolase; peptidase; metallopeptidase; proteolysis; zinc ion binding; metallocarboxypeptidase activity	7	7	5	7	5	1	non-significant	0.144913	0.915405	non-significant	0.488312	-0.208255	non-significant	0.384101	-1.49596	Mutant_abundant	0.0011422	-2.37802	non-significant	0.670576	-0.45382	WT_unique		2.11158
SLIV_33070	A0A076MIL8	X	Secreted protein (Sec) - Transglycosylase-like protein	Sec substrate; transglycosylase; hydrolase; cell-wall bioregesis; housekeeping function	5	5	3	5	0	2	Mutant_abundant	0.0312213	-1.53725	WT_unique		-0.78673	Mutant_abundant	0.0481972	-1.93975	Mutant_abundant	0.0155598	-2.15263	WT_unique			WT_unique		-0.740074
SLIV_25270	D6EEG3	X	Secreted protein (Sec) - Unknown function	Sec substrate; unknown function	6	5	6	7	1	0	non-significant	0.937793	1.12946	WT_unique		2.43363	non-significant	0.332796	-1.28694	Mutant_abundant	0.0494133	-2.12208	WT_unique		3.7193	WT_unique
SLIV_25470	D6EEK1	X	Secreted protein (Sec) - Peptidase	Sec substrate; hydrolase; peptidase; proteolysis; metal binding; housekeeping function	7	7	6	7	6	5	non-significant	0.078704	-1.88274	non-significant	0.201284	-2.09924	non-significant	0.420048	-0.526977	non-significant	0.0662501	-2.19068	Mutant_abundant	3.75538e-06	-4.03868	Mutant_abundant	1.43951e-05	-4.07852
SLIV_07660	D6EKW0	E	Secreted Lipoprotein (Sec) - Aliphatic sulfonates-binding protein (IPR010067)	Sec substrate; lipoprotein; ABC transporter family; transport	7	7	6	7	6	5	Mutant_abundant	0.018429	-2.28292	Mutant_abundant	0.0321647	-1.76156	non-significant	0.912435	-0.493736	non-significant	0.762182	-0.841529	Mutant_abundant	0.00074582	-1.93135	Mutant_abundant	5.95057e-05	-2.35774
SLIV_23775	D6EXX3	E	Secreted lipoprotein (TAT) - ABC transporter periplasmic binding domain	TAT substrate; lipoprotein; transport; ABC transporter system; transport	7	6	6	7	6	5	non-significant	0.165769	-1.36925	non-significant	0.768115	-0.4614	non-significant	0.27575	-0.892871	non-significant	0.308696	-1.02879	Mutant_abundant	0.00226819	-2.8368	Mutant_abundant	0.00512787	-1.64755
SLIV_10395	A0A076M5X6	X	Secreted protein (Sec) - Thiamine ABC transporter periplasmic binding protein (IPR005948)	Sec substrate; solute binding protein; ABC transporter complex; membrane transport system; thiamine binding; thiamine transport; transport	7	7	6	7	6	5	non-significant	0.832109	-0.339708	non-significant	0.783705	-0.24259	non-significant	0.921632	-0.0916385	non-significant	0.298265	-1.00099	Mutant_abundant	0.0171521	-1.14939	Mutant_abundant	0.0390552	-1.60536
SLIV_11215	A0A076M2L9	E	Secreted Lipoprotein (Sec) - L,D-transpeptidase	Sec substrate; transferase; enzymatic activity; peptidoglycan; cell-wall; housekeeping function	7	7	6	7	6	5	non-significant	0.568999	-0.806088	non-significant	0.401733	-0.805421	non-significant	0.661975	-0.207688	non-significant	0.861974	-0.847894	non-significant	0.0294757	0.841301	Mutant_abundant	0.0071782	-4.07852
SLIV_28175	D6ELB1	X	Secreted protein (Sec) - Large protein with potential Endonuclease/exonuclease/phosphatase activity (IPR005135)	Sec substrate; hydrolase; phosphatase; signaling; housekeeping function	3	4	6	5	3	5	non-significant	0.963775	-0.183738	non-significant	0.560072	0.293308	non-significant	0.395466	0.478287	non-significant	0.513105	0.18495	non-significant	0.081274	1.47627	Mutant_abundant	0.0250377	-1.28665
SLIV_17235	D6EJY4	E	Secreted Lipoprotein (Sec) - DR1885-like metal-binding protein	Sec substrate; lipoprotein; metal binding; unknown function	7	7	6	7	6	5	non-significant	0.255569	0.687137	non-significant	0.555483	0.336671	non-significant	0.892933	-0.0516461	non-significant	0.354959	-0.739399	WT_abundant	4.57401e-06	4.38088	Mutant_abundant	0.00411983	-1.63664
SLIV_03490	D6EC72	X	Secreted protein (Sec) - Cupin 2 family	Sec substrate; unknown function	7	5	6	7	0	5	non-significant	0.48614	0.299887	non-significant	0.415907	0.302891	non-significant	0.395024	0.129171	non-significant	0.736182	-0.556077	WT_unique			Mutant_abundant	5.06333e-05	-1.75054
SLIV_22150	D6ETL2	E	Secreted Lipoprotein (Sec) - Unknown function (DUF1524 domain)	Sec substrate; lipoprotein; unknown function	6	3	1	5	2	5	non-significant	0.814157	-0.378408	non-significant	0.256052	-0.744071	WT_unique		-0.561833	non-significant	0.91593	0.066755	WT_unique		-0.775003	Mutant_abundant	0.00277716	-1.50634
SLIV_27675	D6EKA9	E	Secreted Lipoprotein (Sec) - Branched chain amino acid binding protein	Sec substrate; lipoprotein; transport	2	4	6	7	6	5	Mutant_unique		-3.63277	Mutant_unique		-2.56644	Mutant_unique		-2.95294	non-significant		-3.81893	Mutant_unique		-4.51954	Mutant_unique		-3.2851
SLIV_01430	D6EU74	X	Secreted protein (Sec) - Glucan endo-1,3-beta-glucosidase (EC 3.2.1.39)	Sec substrate; hydrolase; carbohydrate binding; glycoside hydrolase; hydrolysis of enrivonmental macromolecules	0	1	5	6	6	5	Mutant_unique			Mutant_unique			Mutant_unique			non-significant			Mutant_unique			Mutant_unique
SLIV_23675	D6EXV4	X	Secreted protein (Sec) - Glycoside hydrolase superfamily protein (IPR017853)	Sec substrate; hydrolase; carbohydrate binding; glycoside hydrolase; hydrolysis of environmental macromolecules	0	1	5	4	6	5	non-significant			non-significant			Mutant_unique			non-significant			Mutant_unique			Mutant_unique
SLIV_14395	D6EDW5	X	Secreted protein (Sec) - Enodpeptidase, NLPC/P60 domain (IPR000064)	Sec substrate; hydrolase; peptidase; proteolysis; unknown function	1	7	5	7	6	5	Mutant_unique		-3.14064	Mutant_unique		-3.72949	Mutant_unique		-3.82287	non-significant		-3.20535	Mutant_unique		-3.5412	Mutant_unique
SLIV_09505	D6EP52	X	Secreted protein (Sec) - Serine protease	Sec substrate; protease; serine proteiase; hydrolase; hydrolysis of environmental macromolecules	1	0	0	1	0	3	Mutant_unique		-3.70056	non-significant		-1.63909	non-significant			non-significant		-0.965944	non-significant			Mutant_unique
SLIV_36310	D6EGD9	X	Secreted protein (Sec) - Unknown function	Sec substrate; unknown function	0	0	0	0	2	3	non-significant			non-significant			non-significant			non-significant			non-significant			Mutant_unique
SLIV_06970	A0A076M3U4	X	Secreted protein (Sec) - Mannan endo-1,4-beta-mannosidase (EC 3.2.1.78)	Sec substrate; hydrolase; carbohydrate binding; glycoside hydrolase; hydrolysis of environmental macromolecules	4	1	5	5	6	4	non-significant	0.793373	0.409356	non-significant	0.542857	-0.303635	non-significant	0.892933	-0.0955825	non-significant	0.851994	0.352238	Mutant_abundant	0.000223549	-6.55122	non-significant	0.102997	-2.89913
SLIV_17560	D6EK48	X	Secreted protein (Sec) - Unknown function containing DUF2993 domain	Sec substrate; unknown function	7	7	6	6	6	5	non-significant	0.372038	-2.37151	non-significant	0.207481	-1.54738	non-significant	0.839232	-0.381368	non-significant	0.905607	-0.276133	Mutant_abundant	0.024557	-3.78149	non-significant	0.0925182	-1.89328
SLIV_12815	D6EW80	E	Secreted Lipoprotein (Sec) - ABC transporter lipoprotein BldKB (BldKB)	Sec substrate; lipoprotein; transporter; ABC transporter complex; membrane transport system; transport	7	7	6	7	6	5	non-significant	0.81525	-0.118004	non-significant	0.622365	0.0383524	non-significant	0.850478	-0.179856	non-significant	0.309126	-1.3723	Mutant_abundant	0.00799274	-1.77628	non-significant	0.0849768	-1.89328
SLIV_13270	D6EXL1	X	Secreted protein (Sec) - Unknown function	Sec substrate; unknown function	7	7	6	7	6	5	non-significant	0.352335	-0.878141	non-significant	0.23664	-1.19767	non-significant	0.839232	-0.678978	non-significant	0.129596	-1.14322	Mutant_abundant	0.0439883	-1.46167	non-significant	0.068857	-1.38598
SLIV_34825	D6ED97	X	Secreted protein (TAT) - Glycosyl hydrolase, five-bladed beta-propellor domain (IPR023296)	TAT substrate; hydrolase; carbohydrate binding; unknown function	6	1	5	7	5	4	non-significant	0.342133	-0.955991	non-significant	0.228639	-1.16669	non-significant	0.862682	-0.461144	non-significant	0.129104	-2.09612	Mutant_abundant	0.00401059	-2.60059	non-significant	0.423503	-1.16184
SLIV_13700	A0A076M0C2	E	Secreted Lipoprotein (Sec) - L,D-transpeptidase	Sec substrate; lipoprotein; enzymatic activity; peptidoglycan binding; cell-wall biosynthesis; housekeeping function	7	7	6	7	6	5	non-significant	0.0867948	-1.35841	non-significant	0.193347	-1.10256	non-significant	0.48395	-0.714073	non-significant	0.064258	-1.4785	Mutant_abundant	0.0187795	-1.46026	non-significant	0.0111531	-0.914239
SLIV_36430	A0A076MCC8	X	Secreted protein (Sec) - Uncharacterized protein	Sec substrate; unknown function	7	7	6	7	6	5	non-significant	0.0565752	-1.67034	non-significant	0.153172	-1.40549	non-significant	0.45373	-0.721255	non-significant	0.0921162	-1.17973	Mutant_abundant	0.000676103	-2.38464	non-significant	0.027201	-0.811786
SLIV_34870	A0A076MFY8	X	Secreted protein (Sec) - Unknown function	Sec substrate; unknown function	7	7	6	7	6	5	non-significant	0.621415	0.137452	non-significant	0.982594	-0.509473	non-significant	0.728816	-0.347219	non-significant	0.465044	-1.43765	Mutant_abundant	0.00103163	-2.10273	non-significant	0.153343	-0.532112
SLIV_13275	D6EXL2	E	Secreted Lipoprotein (Sec) - Unknown function	Sec substrate; lipoprotein; unknown function	7	7	6	7	6	5	non-significant	0.05677	-1.27283	non-significant	0.0691609	-1.37665	non-significant	0.839232	-0.458081	non-significant	0.128715	-1.25522	Mutant_abundant	0.00014296	-2.84227	non-significant	0.0053677	-0.531576
SLIV_19925	D6EPF3	X	Secreted protein (Sec) - Tachylectin 2 domain containing protein (IPR023294)	Sec substrate; carbohydrate binding; unknown function	7	7	6	7	6	5	non-significant	0.733671	-0.32373	non-significant	0.518041	-0.573584	non-significant	0.963202	-0.608963	non-significant	0.161388	-0.978445	Mutant_abundant	0.0050037	-1.62555	non-significant	0.0902423	-0.44153
SLIV_11275	D6ET25	X	Secreted protein (Sec) - Neutral zinc metalloprotease	Sec substrate; hydrolase; peptidase; proteolysis; metal binding; housekeeping function	7	7	6	7	6	4	non-significant	0.424227	-1.01279	non-significant	0.415907	-0.819961	non-significant	0.330788	-0.827006	non-significant	0.37774	-0.361468	Mutant_abundant	1.80646e-06	-7.2608	non-significant	0.582943	-0.438138
SLIV_05455	A0A076LZF9	X	Secreted protein (TAT) - Protein possibly involved in signal transduction. ALF stands for Alanine-rich (AL) - conserved Phenylalanine (F)	TAT substrate; unknown function	7	7	6	7	6	5	non-significant	0.179281	-1.11511	non-significant	0.275783	-0.87439	non-significant	0.907532	-0.00405157	non-significant	0.308696	-0.86875	Mutant_abundant	0.00436049	-1.60321	non-significant	0.129173	-0.390651
SLIV_10325	D6EQD3	X	Secreted protein (Sec) - Peptidase	Sec substrate; hydrolase; peptidase; proteolysis; metal binding; cell-wall biosynthesis; housekeeping function	7	7	6	7	6	5	WT_abundant	0.00285532	2.19128	WT abundant	0.0431624	1.4467	non-significant	0.414336	0.338594	non-significant	0.760265	-0.0646337	Mutant_abundant	0.0118479	-2.21368	non-significant	0.00023019	-0.199429
SLIV_21285	A0A076M4I0	E	Secreted Lipoprotein (Sec) - Unknown function (DUF3558 family)	Sec substrate; lipoprotein; unknown function	6	4	6	5	6	5	non-significant	0.0867948	-1.70717	non-significant	0.49367	-0.966604	non-significant	0.170991	-1.57912	non-significant	0.156297	-1.1649	Mutant_abundant	0.00590572	-2.15884	non-significant	0.0542216	-0.104704
SLIV_22200	D6ETM2	X	Secreted protein (Sec) - Protein with Lysozyme-like domain (IPR023346) and LysM domain (IPR018392)	Sec substrate; hydrolase; peptidoglycan binding; housekeeping function	7	7	6	7	6	5	non-significant	0.739014	0.153979	non-significant	0.107126	-1.34666	non-significant	0.936411	-0.232442	non-significant	0.120094	-0.956533	Mutant_abundant	0.000187764	-2.18639	non-significant	0.00397496	-0.0922067
SLIV_04960	D6EFA2	X	Secreted protein (Sec) - Glycosyl hydrolase	Sec substrate; hydrolase; carbohydrate binding; glycoside hydrolase; unknown function	6	7	4	6	6	5	non-significant	0.869466	0.109194	non-significant	0.478421	-0.523634	non-significant	0.908673	-0.391986	non-significant	0.0990271	-1.85438	Mutant_abundant	0.00187534	-1.4225	non-significant	0.770622	-0.0362429
SLIV_02315	D6EVU6	E	Secreted Lipoprotein (Sec) - Binding-protein-dependent transport	Sec substrate; lipoprotein; transporter; membrane transport system; transport	7	7	6	7	6	5	non-significant	0.295753	0.489787	non-significant	0.346968	-0.647091	WT_abundant	0.0289975	1.35159	non-significant	0.114892	0.609949	Mutant_abundant	0.00148888	-1.57642	non-significant	0.988178	0.0200013
SLIV_07590	A0A076M0T5	X	Secreted protein (Sec) - Peptidase S1A, chymotrypsin family	Sec substrate; hydrolase; peptidase; proteolysis; metal binding; hydrolysis of environmental molecules	7	7	6	7	6	5	non-significant	0.105987	-1.0918	non-significant	0.282432	-0.826804	non-significant	0.744645	-0.535608	non-significant	0.0778042	-1.02053	Mutant_abundant	0.0355124	-1.10311	non-significant	0.423503	0.128626
SLIV_23095	D6EWE8	X	Secreted protein (TAT) - Peptidase M6, InhA family protein	TAT substrate; hydrolase; peptidase; proteolysis; metal binding; protective immunity	7	7	6	7	6	5	non-significant	0.893638	0.0227429	non-significant	0.622365	0.261405	WT_abundant	0.0244	1.62884	non-significant	0.0771662	0.892556	Mutant_abundant	0.0135547	-1.41807	non-significant	0.121606	0.527269
SLIV_12365	A0A076M6Z2	X	Secreted protein (Sec) - Lon protease (IPR027065)	Sec substrate; hydrolase; protease; proteolysis; heat shock response; thermal stress; housekeeping function	7	7	6	7	6	5	non-significant	0.350236	-0.845507	non-significant	0.279912	-1.69431	non-significant	0.957295	-0.251427	non-significant	0.309126	-0.322866	Mutant_abundant	0.00405691	-2.64312	non-significant	0.051066	0.539105
SLIV_24935	A0A076MAE6	E	Secreted Lipoprotein (Sec) - Unknown function	Sec substrate; lipoprotein; unknown function	7	7	6	7	6	5	non-significant	0.618402	-0.402576	non-significant	0.494849	-1.08218	non-significant	0.963202	-0.178733	non-significant	0.653657	-0.364488	Mutant_abundant	0.00718977	-2.13643	non-significant	0.124019	0.762993
SLIV_12065	D6EUM7	E	Secreted Lipoprotein (Sec) - Solute-binding protein	Sec substrate; lipoprotein; solute binding protein; membrane transport system; transport	5	2	6	7	4	5	non-significant	0.179281	-2.39561	non-significant	0.564556	-0.584384	non-significant	0.468128	-1.9262	non-significant	0.0807454	-1.85247	Mutant_abundant	0.0309978	-2.46078	non-significant	0.186117	0.947701
SLIV_25105	D6EEC9	X	Secreted protein (Sec) - Protein with Alpha/Beta hydrolase fold (IPR029058) and Peptidase S33 tripeptidyl aminopeptidase-like, C-terminal (IPR013595)	Sec substrate; hydrolase; peptidase; proteolysis; metal binding; hydrolysis of environmental macromolecules	7	7	6	7	6	5	non-significant	0.972406	-0.0508035	non-significant	0.52475	-0.645033	non-significant	0.8172	-0.227253	non-significant	0.120125	-1.0057	Mutant_abundant	0.0271253	-1.38379	non-significant	0.118928	1.12249
SLIV_03205	D6EC14	E	Secreted protein (Sec) - Iron transport lipoprotein - ABC transporter family (IPR002491)	Sec substrate; lipoprotein; transporter; membrane transport system; housekeeping function	3	5	5	7	6	3	non-significant	0.793373	-0.0565249	non-significant	0.281549	-1.31975	non-significant	0.214126	-1.43181	non-significant	0.0517041	-2.56776	Mutant_abundant	0.00436049	-3.50411	non-significant	0.26388	2.19214
SLIV_20555	D6EQJ1	E	Secreted Lipoprotein (Sec) - Unknown function	Sec substrate; lipoprotein; unknown function	7	7	4	5	6	4	non-significant	0.739014	-0.785649	non-significant	0.855159	-0.321647	non-significant	0.72669	-0.568245	non-significant	0.519733	-0.510845	Mutant_abundant	0.00129487	-3.45879	non-significant	0.0786102
SLIV_11170	A0A076M2T6	P	Secreted protein (Sec) - Zinc D-Ala-D-Ala carboxypeptidase (EC 3.4.17.14)	Sec substrate; hydrolase; peptidase; proteolysis; virulence; protective immunity; cell-wall degradation	7	7	5	4	6	3	non-significant	0.19935	-1.00795	non-significant	0.398666	-0.787323	non-significant	0.548976	0.143651	non-significant	0.840038	0.0612756	Mutant_abundant	0.00264648	-3.21386	non-significant	0.956415
SLIV_04830	A0A076M2N8	X	Secreted protein (Sec) - Metallopeptidase	Sec substrate; hydrolase; peptidase; proteolysis; metal binding; metabolic process	7	7	6	7	6	5	non-significant	0.564885	0.135917	non-significant	0.409189	0.0413096	non-significant	0.72669	-0.751373	non-significant	0.0990271	-1.22424	Mutant_abundant	0.0103206	-2.11687	non-significant	0.179073
SLIV_14270	D6ECQ3	X	Secreted protein (Sec) - Unknown function	Sec substrate; unknown function	1	1	2	1	3	0	non-significant			non-significant			non-significant		-1.71796	non-significant		-4.93628	Mutant_unique		-7.17229	non-significant		-0.999552
SLIV_00720	D6ESN1	X	Secreted protein (Sec) - Unknown function	Sec substrate; unknown function	0	0	0	0	6	0	non-significant			non-significant			non-significant			non-significant			Mutant_unique			non-significant
SLIV_14210	D6ECP1	E	Secreted Lipoprotein (Sec) - Glycine betaine-binding lipoprotein	Sec substrate; lipoprotein; transporter; osmoregulation; housekeeping function	0	1	3	6	5	1	Mutant_unique			Mutant_unique			Mutant_unique			non-significant			Mutant_unique			non-significant
SLIV_23460	A0A076M9M0	E	Secreted Lipoprotein (Sec) - Unknown function	Sec substrate; lipoprotein; unknown function	0	0	3	5	6	1	non-significant			non-significant			Mutant_unique			non-significant			Mutant_unique			non-significant
SLIV_22260	D6ETN2	E	Secreted Lipoprotein (Sec) - Unknown function	Sec substrate; lipoprotein; unknown function	0	4	0	1	3	0	non-significant			non-significant			non-significant			non-significant			Mutant_unique			non-significant
SLIV_01140	D6ESW7	X	Secreted protein (Sec) - Extracellular small neutral protease	Sec substrate; hydrolase; peptidase; proteolysis; zinc ion binding; metalloendopeptidase activity; hydrolysis of environmental macromolecules	0	0	4	2	6	1	non-significant			non-significant			Mutant_unique			non-significant			Mutant_unique			non-significant
SLIV_27975	D6EKH0	X	Secreted protein (Sec) - Zinc-binding carboxypeptidase	Sec substrate; hydrolase; peptidase; proteolysis; metal binding; hydrolysis of environmental macromolecules	0	4	5	3	6	2	Mutant_unique			non-significant			Mutant_unique			non-significant			Mutant_unique			non-significant
SLIV_11270	D6ET24	X	Secreted protein (TAT) - Neutral zinc metalloprotease	TAT substrate; hydrolase; peptidase; proteolysis; metal binding; ECM remodeling	0	1	3	7	6	1	Mutant_unique			Mutant_unique			Mutant_unique			non-significant			Mutant_unique			non-significant
SLIV_21470	D6ES26	X	Secreted protein (TAT) - unknown function	TAT substrate; unknown function	0	1	2	4	5	0	non-significant			non-significant			non-significant			non-significant			Mutant_unique			non-significant
SLIV_23525	D6EWM9	X	Secreted protein (TAT) - Amino acid ABC transporter substrate-binding protein	TAT substrate; solute binding protein; ABC transporter complex; membrane transport system; transport	0	1	2	5	6	1	Mutant_unique			Mutant_unique			non-significant			non-significant			Mutant_unique			non-significant
SLIV_10835	A0A076M2F2	X	Secreted protein (TAT) - Lyase	TAT substrate; lyase; carbohydrate binding; hydrolysis of environmental macromolecules	0	0	1	0	6	0	non-significant			non-significant			non-significant			non-significant			Mutant_unique			non-significant
SLIV_29900	A0A076MH05	X	Secreted protein (TAT) - Glycerophosphoryl diester phosphodiesterase	TAT substrate; hydrolase; phosphodiesterase activity; metabolic process; hydrolysis of environmental macromolecules	0	0	1	4	6	0	non-significant			non-significant			non-significant			non-significant			Mutant_unique			non-significant
SLIV_34725	D6ED78	X	Secreted protein (Sec) - Cellulose binding protein	Sec substrate; cellulose binding; carbohydrate binding; hydrolysis of environmental macromolecules	0	0	0	0	6	0	non-significant			non-significant			non-significant			non-significant			Mutant_unique			non-significant
SLIV_16580	D6EIJ0	X	Secreted protein (Sec) - Protein containing FG-GAP repeat domain (IPR013517)	Sec substrate; unknown function	4	0	6	6	5	5	non-significant	0.255569	-1.15382	non-significant	0.497251	-0.716139	non-significant	0.999383	-0.290909	non-significant	0.494129	-0.599691	non-significant	0.295659	-1.0605	non-significant	0.0922326	-3.05436
SLIV_27025	D6EIW7	X	Secreted protein (Sec) - Protein with Endopeptidase, NLPC/P60 domain (IPR000064)	Sec substrate; hydrolase; peptidase; proteolysis; unknown function	7	7	6	7	6	5	non-significant	0.928062	-0.0949275	non-significant	0.699651	0.0436362	non-significant	0.985467	-0.487584	non-significant	0.459272	-0.957832	non-significant	0.31427	0.271231	non-significant	0.946452	-2.72915
SLIV_07140	A0A076M0H8	X	Secreted protein (Sec) - Esterase	Sec substrate; hydrolase; peptidase; proteolysis; serine-type peptidase activity; hydrolysis of environmental macromolecules	7	7	6	7	6	5	non-significant	0.336995	0.692384	non-significant	0.550866	-0.495097	non-significant	0.0526665	1.4457	non-significant	0.32934	0.504079	non-significant	0.799701	-0.15285	non-significant	0.329758	-2.35229
SLIV_00680	D6ESM3	X	Secreted protein (Sec) - Unknown function	Sec substrate; unknown function	1	0	3	3	2	2	Mutant_unique		-2.26116	Mutant_unique		-1.89706	Mutant_unique		-1.94903	non-significant		-2.8747	non-significant		-3.46022	non-significant		-1.37898
SLIV_10015	D6EQ71	E	Secreted Lipoprotein (Sec) - Lipoprotein of unknown function	Sec substrate; lipoprotein; unknown function	7	0	6	7	5	5	non-significant	0.843494	-0.236858	non-significant	0.605383	-0.588054	non-significant	0.345335	-0.73109	non-significant	0.250926	-0.779711	non-significant	0.105348	-1.03435	non-significant	0.0537654	-0.811552
SLIV_15645	D6EFQ7	X	Secreted protein (Sec) - Unknown function	Sec substrate; unknown function	7	7	5	7	6	5	non-significant	0.923165	-0.467363	non-significant	0.455277	-0.883263	non-significant	0.680455	-0.755372	non-significant	0.28115	-1.00569	non-significant	0.375831	-0.685557	non-significant	0.251524	-0.745446
SLIV_25550	A0A076MAR6	X	Secreted protein (TAT) - Beta-galactosidase	TAT substrate; hydrolase; glycoside hydrolase; carbohydrate binding; carbohydrate metabolic process; metabolic process	7	7	6	7	6	5	non-significant	0.0778592	2.17251	non-significant	0.11155	1.98454	non-significant	0.498736	1.00139	non-significant	0.940781	0.332307	non-significant	0.785478	-0.968385	non-significant	0.542327	-0.668867
SLIV_05705	D6EGU7	X	Secreted protein (Sec) - Uncharacterized protein	Sec substrate; unknown function	7	6	6	7	5	5	non-significant	0.211586	-0.707467	non-significant	0.613016	-0.535508	non-significant	0.330788	-0.459176	non-significant	0.224761	-0.816381	non-significant	0.266172	0.340032	non-significant	0.00948674	-0.633978
SLIV_18495	D6EM44	E	Secreted Lipoprotein (Sec) - DR1885-like metal-binding protein (IPR007410)	Sec substrate; lipoprotein; metal binding; unknown function	6	7	4	6	5	5	non-significant	0.13991	1.93798	non-significant	0.472248	0.809816	non-significant	0.111273	1.91582	non-significant	0.117533	1.37157	non-significant	0.617984	0.504759	non-significant	0.102997	-0.629595
SLIV_26065	D6EG20	X	Secreted protein (Sec) - Uncharacterized protein	Sec substrate; unknown function	7	7	6	7	6	5	non-significant	0.782095	-0.00455418	non-significant	0.306139	-0.715715	non-significant	0.681257	-0.046544	non-significant	0.728443	-0.78941	non-significant	0.235129	-0.622191	non-significant	0.0127218	-0.588031
SLIV_19965	D6EPG1	E	Secreted Lipoprotein (Sec) - Solute binding lipoprotein	Sec substrate; lipoprotein; solute binding protein; membrane transport system; transport	7	7	6	7	6	5	non-significant	0.232593	-0.720286	non-significant	0.303499	-0.674009	non-significant	0.853729	-0.289526	non-significant	0.0770087	-1.08693	non-significant	0.03365	-0.792757	non-significant	0.019988	-0.547889
SLIV_22655	D6EV06	E	Secreted Lipoprotein (Sec) - LpqB Quinoprotein amine dehydrogenase, beta chain-like (IPR011044) with GerMN domain (IPR019606)	Sec substrate; lipoprotein; sporulation; germination; Quinohemoprotein amine dehydrogenase; dehydrogenase; housekeeping function	7	7	6	7	6	5	non-significant	0.501787	-0.559406	non-significant	0.875354	-0.208157	non-significant	0.858497	-0.115906	non-significant	0.184678	-1.25449	non-significant	0.418818	-0.600125	non-significant	0.0882231	-0.473679
SLIV_24045	A0A076M3Q5	E	Secreted Lipoprotein (Sec) - Lipoprotein localisation LolA/LolB/LppX-like protein (IPR029046)	Sec substrate; lipoprotein; transport; macromolecule localization; housekeeping function	7	7	6	7	6	5	non-significant	0.645489	-0.347177	non-significant	0.401222	-0.617215	non-significant	0.936411	-0.159192	non-significant	0.23418	-0.804403	non-significant	0.450098	0.440832	non-significant	0.447992	-0.452369
SLIV_22195	D6ETM1	X	Secreted protein (Sec) - Secreted protein with Lysozyme-like domain (IPR023346) and LysM domain (IPR018392)	Sec substrate; hydrolase; cell-wall biosynthesis; housekeeping function	7	7	6	7	6	5	non-significant	0.869466	0.158033	non-significant	0.769667	0.143171	non-significant	0.285087	0.846987	non-significant	0.703361	0.147975	non-significant	0.694602	0.248598	non-significant	0.182479	-0.442061
SLIV_21290	D6ERZ1	E	Secreted Lipoprotein (Sec) - Serine-rich lipoprotein	Sec substrate; lipoprotein; unknown function	7	7	6	7	6	5	non-significant	0.972406	0.199496	non-significant	0.488312	-0.721265	non-significant	0.999383	-0.0103846	non-significant	0.321659	-0.31318	non-significant	0.128598	-1.16063	non-significant	0.245059	-0.371006
SLIV_26340	A0A076MF68	X	Secreted protein (TAT) - Dyp-type peroxidase (IPR006314)	TAT substrate; oxidoreductase; oxidation-reduction process; antibiotic biosynthesis; metabolic process	7	7	6	7	6	5	non-significant	0.351776	-0.70073	non-significant	0.421014	-0.657397	non-significant	0.997501	-0.283587	non-significant	0.538163	-1.15775	non-significant	0.397001	-0.562731	non-significant	0.231916	-0.36331
SLIV_14975	A0A076M0Y6	X	Secreted protein (TAT) - Secreted Endopeptidase, NLPC/P60 domain (IPR000064)	TAT substrate; hydrolase; peptidase; proteolysis; unknown function	7	7	6	7	6	5	non-significant	0.480495	-0.536114	non-significant	0.358316	-0.630902	non-significant	0.979526	-0.218734	non-significant	0.159622	-1.1273	non-significant	0.118751	-0.852826	non-significant	0.120588	-0.335725
SLIV_18000	D6EL38	E	Secreted Lipoprotein (Sec) - Unknown function (DUF306 domain)	Sec substrate; lipoprotein; unknown function	7	7	6	7	6	5	non-significant	0.996677	0.189529	non-significant	0.497251	-0.609354	non-significant	0.99688	-0.367609	non-significant	0.308696	-0.582633	non-significant	0.506616	-0.566086	non-significant	0.503686	-0.285413
SLIV_03045	A0A076LUB5	P	Secreted protein (Sec) - N-acetylmuramoyl-L-alanine amidase (domain IPR002502)	Sec substrate; hydrolase; carbohydrate binding; carbohydrate metabolic process; metabolic process	7	7	6	7	4	5	non-significant	0.90401	0.16069	non-significant	0.862928	0.0870238	non-significant	0.467933	0.379417	non-significant	0.778313	-0.0839229	non-significant	0.110468	0.840272	non-significant	0.96625	-0.284347
SLIV_13850	D6ECG9	E	Secreted Lipoprotein (Sec) - Unknown function	Sec substrate; lipoprotein; unknown function	7	7	6	7	6	5	non-significant	0.918243	-0.230282	non-significant	0.281549	-1.20716	non-significant	0.986839	-0.662628	non-significant	0.0771662	-1.41403	non-significant	0.0501753	-1.30071	non-significant	0.393864	-0.233983
SLIV_11405	D6ET51	X	Secreted protein (Sec) - Cholesterol esterase	Sec substrate; hydrolase; esterase; unknown function	6	7	2	5	4	4	non-significant	0.574953	-0.550474	non-significant	0.378593	2.64483	WT_unique		-0.605358	non-significant	0.762182	-0.904159	non-significant	0.696288	1.21048	non-significant	0.704342	-0.159682
SLIV_31855	D6ESG8	X	Secreted protein (Sec) - Cellulose binding protein	Sec substrate; cellulose binding; carbohydrate binding; hydrolase; carbohydrate metabolic process; metabolic process	7	7	6	7	6	5	non-significant	0.856089	0.0774588	non-significant	0.930823	-0.129669	non-significant	0.876492	-0.292518	non-significant	0.0763686	-1.1209	non-significant	0.356892	-0.32693	non-significant	0.561134	-0.0945615
SLIV_17860	D6EL15	X	Secreted protein (Sec) - Cell wall peptidase	Sec substrate; hydrolase; peptidoglycan binding; cell-wall binding; housekeeping function	7	7	6	7	6	5	non-significant	0.188863	0.870899	non-significant	0.441762	-0.883841	non-significant	0.360258	0.370576	non-significant	0.609743	-0.232967	non-significant	0.83575	-0.414335	non-significant	0.645564	-0.0805469
SLIV_07245	A0A076M3Y1	E	Secreted Lipoprotein (Sec) - Deacetylase	Sec substrate; lipoprotein; carbohydrate metabolic process; catalytic activity; metabolic process	7	7	6	7	6	5	non-significant	0.584769	0.335464	non-significant	0.734368	0.0978935	non-significant	0.986839	-0.252831	non-significant	0.211427	-0.988635	non-significant	0.368964	0.355601	non-significant	0.837066	-0.0798795
SLIV_02325	D6EVU8	X	Secreted protein (Sec) - Lipase (IPR005152) with Alpha/Beta hydrolase fold (IPR029058)	Sec substrate; hydrolase; lipase; metabolic process; hydrolysis of environmental macromolecules	2	1	1	3	0	1	non-significant			non-significant			non-significant		-0.364521	non-significant		0.491776	non-significant			non-significant		-0.074548
SLIV_36485	D6EGH5	P	Secreted protein (Sec) - Peptidoglycan binding protein	Sec substrate; peptidoglycan binding; cell-wall biosynthesis; housekeeping function	7	7	6	7	6	5	non-significant	0.30059	-0.585001	non-significant	0.694253	-0.311019	non-significant	0.880237	-0.202034	non-significant	0.267023	-0.731354	non-significant	0.329818	-0.5772	non-significant	0.855451	0.016982
SLIV_04895	D6EF89	X	Secreted protein (Sec) - Oxidoreductase	Sec substrate; oxidoreductase; oxidation-reduction process; metabolic process	7	5	6	6	4	3	non-significant	0.4078	0.422855	WT_unique		-1.01131	non-significant	0.987277	0.12095	non-significant	0.840038	0.0819371	non-significant	0.0679339	-1.4399	non-significant	0.838137	0.0561158
SLIV_14380	D6ECS6	X	Secreted protein (Sec) - Enodpeptidase, NLPC/P60 domain (IPR000064)	Sec substrate; hydrolase; peptidase; proteolysis; unknown function	7	7	6	7	6	5	WT_abundant	0.0312213	1.60262	non-significant	0.415907	-0.963962	non-significant	0.221819	0.676376	non-significant	0.248263	0.506765	non-significant	0.772826	-0.0546187	non-significant	0.862606	0.0811539
SLIV_26360	A0A076MBC3	E	Secreted Lipoprotein (Sec) - Binding-protein-dependent transport	Sec substrate; lipoprotein; transporter; membrane transport system; ABC transporter system; transport	7	7	6	7	6	5	non-significant	0.564885	0.384893	non-significant	0.542857	-0.512268	non-significant	0.094729	1.07163	non-significant	0.265439	0.451542	non-significant	0.114194	0.758516	non-significant	0.0160655	0.125813
SLIV_15535	D6EFN5	E	Secreted Lipoprotein (Sec) - Unknown function	Sec substrate; lipoprotein; unknown function	7	7	6	7	6	5	non-significant	0.44748	0.26276	non-significant	0.398666	0.263611	non-significant	0.412996	0.227386	non-significant	0.310652	-0.679003	non-significant	0.063166	0.580038	non-significant	0.418685	0.129634
SLIV_03130	D6EXF5	X	Secreted protein (Sec) - Alpha/Beta hydrolase fold protein (IPR029058)	Sec substrate; hydrolase; metabolic process; hydrolysis of environmental macromolecules	7	7	6	7	6	5	non-significant	0.193043	-0.758955	non-significant	0.641673	0.11248	non-significant	0.883195	-0.315043	non-significant	0.53789	-0.569192	non-significant	0.222457	-0.590345	non-significant	0.513815	0.151396
SLIV_29495	D6ENK7	X	Secreted protein (Sec) - Unknown function	Sec substrate; unknown function	7	7	6	7	6	5	non-significant	0.495132	-0.355152	non-significant	0.126723	-0.939603	non-significant	0.987277	-0.252734	non-significant	0.0733012	-1.16438	non-significant	0.0484984	-0.970363	non-significant	0.457557	0.177874
SLIV_15460	A0A076M8W3	X	Secreted protein (Sec) - Enodpeptidase, NLPC/P60 domain (IPR000064)	Sec substrate; hydrolase; peptidase; proteolysis; unknown function	7	7	6	5	6	5	non-significant	0.793373	-0.425451	non-significant	0.329597	-0.616842	non-significant	0.702405	0.0859119	non-significant	0.940781	-1.11175	non-significant	0.264756	-1.59315	non-significant	0.337609	0.459668
SLIV_01030	D6ESU5	X	Secreted protein (TAT) - Protein with Lysyl oxidase domain (IPR001695)	TAT substrate; oxidoreductase; oxidation-reduction process; housekeeping function; ECM-remodeling	7	7	6	7	6	5	non-significant	0.869466	-0.148889	non-significant	0.614892	-0.414063	non-significant	0.111273	0.844889	non-significant	0.0510433	0.922113	non-significant	0.0465593	0.787604	non-significant	0.0439504	0.497998
SLIV_05465	D6EGP9	X	Secreted protein (Sec) - Unknown function	Sec substrate; unknown function	7	6	5	7	6	5	non-significant	0.367237	0.384901	non-significant	0.734368	-0.823894	non-significant	0.338065	-0.0854776	non-significant	0.925705	-0.818829	non-significant	0.508899	-0.616151	non-significant	0.102997	0.509244
SLIV_05470	A0A076LTK4	X	Secreted protein (Sec) - Esterase	Sec substrate; hydrolase; peptidase; proteolysis; serine-type peptidase activity; metabolic process; ECM organization; hydrolysis of environmental macromolecules	7	7	6	7	6	5	non-significant	0.901483	-0.17663	non-significant	0.401222	-0.589228	non-significant	0.366305	0.520231	non-significant	0.564015	-0.480237	non-significant	0.0412067	-0.97767	non-significant	0.418685	0.57732
SLIV_16285	A0A076M993	X	Secreted protein (Sec) - Uncharacterized protein	Sec substrate; unknown function	2	4	4	3	0	1	non-significant		2.11078	non-significant			Mutant_unique		0.375998	non-significant		0.314123	non-significant			non-significant		0.694359
SLIV_09980	D6EQ64	X	Secreted protein - T7SS ESAT-6-like protein (EsxA) (IPR010310)	T7 substrate; virulence	7	7	6	7	6	5	non-significant	0.0829723	-1.35406	non-significant	0.955274	-0.0454789	non-significant	0.916681	-0.0665328	non-significant	0.836852	-0.188093	non-significant	0.0677183	0.83871	non-significant	0.0330515	0.727323
SLIV_27125	A0A076M7D4	P	Secreted protein (Sec) - N-acetylmuramoyl-L-alanine amidase domain (IPR002502) with Tachylectin 2 domain (IPR023294)	Sec substrate; carbohydrate binding; amidase; carbohydrate binding; carbohydrate hydrolase; peptidoglycan catabolic process; cell-wall biosynthesis; housekeeping function	7	7	6	7	6	5	non-significant	0.155341	0.741731	non-significant	0.783705	-0.00446727	non-significant	0.0647722	1.10757	non-significant	0.248978	0.315393	non-significant	0.283354	0.292491	non-significant	0.00383289	0.740469
SLIV_11120	D6ESZ4	E	Secreted Lipoprotein (Sec) - Oligopeptide-binding lipoprotein	Sec substrate; lipoprotein; solute-binding protein; transmembrane transport; membrane transport system; transport	7	7	6	7	6	5	non-significant	0.352335	-0.655959	non-significant	0.281549	0.644494	non-significant	0.8172	-0.541582	non-significant	0.225191	-1.07219	non-significant	0.0938741	-0.959959	non-significant	0.298274	0.772278
SLIV_06340	D6EIC1	X	Secreted protein (TAT) - Protein containing Carbohydrate-binding/sugar hydrolysis domain (IPR006633)/Pectate lyase superfamily protein (IPR024535)	TAT substrate; lyase; carbohydrate binding; virulence; pectin lyase	7	7	6	7	6	5	non-significant	0.221929	0.670143	non-significant	0.997098	-0.142273	non-significant	0.216402	0.660566	non-significant	0.781037	-0.52267	non-significant	0.202752	0.325512	non-significant	0.0330996	0.834305
SLIV_25665	A0A076M4R0	X	Secreted protein (TAT) - Aldose 1-epimerase	TAT substrate; epimerase; isomerase; metabolic process	7	7	5	7	6	4	non-significant	0.800595	-0.453068	non-significant	0.903779	-0.848796	non-significant	0.728816	-0.39744	non-significant	0.734073	-0.934671	non-significant	0.240794	-0.658951	non-significant	0.0125015	0.934969
SLIV_18415	A0A076M6N3	E	Secreted protein (Sec) - Unknown function (DUF4232 family)	Sec substrate; lipoprotein; unknown function	7	7	6	7	6	5	non-significant	0.0705758	-1.20076	non-significant	0.157633	-1.05963	non-significant	0.504552	0.252698	non-significant	0.743844	-0.0615229	non-significant	0.420225	0.248968	non-significant	0.35361	1.47094
SLIV_08115	D6ELV4	X	Secreted protein (Sec) - Alpha-1,2-mannosidase, putative	Sec substrate; hydrolase; galactose-binding; carbohydrate binding; metabolic process	7	7	5	7	5	3	non-significant	0.272198	0.880407	non-significant	0.850564	-0.441681	non-significant	0.216402	1.00453	non-significant	0.862405	-0.342196	non-significant	0.105633	0.676468	non-significant	0.235549	1.54077
SLIV_18505	A0A076MAJ9	X	Secreted protein (TAT) - Deferrochelatase/peroxidase EfeB	TAT substrate; ferrus iron transport; heme binding; redox homestasis; housekeeping function	0	3	3	6	0	1	non-significant			non-significant			Mutant_unique			non-significant			non-significant			non-significant
SLIV_13280	D6EXL3	E	Secreted Lipoprotein (Sec) - Unknown function	Sec substrate; lipoprotein; unknown function	1	3	4	6	0	0	Mutant_unique		-0.0643752	Mutant_unique		-0.262727	Mutant_unique		-0.311519	non-significant		-0.994133	non-significant			non-significant
SLIV_17715	A0A076M6E7	E	Secreted Lipoprotein (Sec) - Putative CO dehydrogenase flavoprotein-like protein (IPR016169) involved in the biosynthesis of numerous isoquinoline alkaloids (IPR012951)	Sec substrate; lipoprotein; oxidation-reduction process; oxidoreductase; redox homeostasis; metabolic process	0	0	3	3	2	0	non-significant			non-significant			Mutant_unique			non-significant			non-significant			non-significant
SLIV_37465	D6EJD1	E	Secreted Lipoprotein (Sec) - Unknown function	Sec substrate;	0	4	0	0	0	0	non-significant			non-significant			non-significant			non-significant			non-significant			non-significant
SLIV_21245	D6ERY3	E	Secreted Lipoprotein (Sec) - Unknown function (DUF4232 family)	Sec substrate; lipoprotein; unknown function	7	7	6	7	6	5	non-significant	0.925848	-0.0584427	non-significant	0.214366	-0.888782	non-significant	0.331351	0.432517	non-significant	0.298265	-0.739723	non-significant	0.111249	-0.688196	non-significant	0.124517
SLIV_16755	A0A076M5S2	E	Secreted lipoprotein (TAT)	TAT substrate; lipoprotein; unknown function	7	7	6	7	6	5	non-significant	0.295753	0.484884	non-significant	0.310086	0.423743	non-significant	0.251705	0.578637	non-significant	0.941435	-0.480811	non-significant	0.928919	-0.231311	non-significant	0.738083
SLIV_14075	A0A076M7Y6	X	Secreted protein (Sec) - Putative beta-hexosaminidase (IPR015882)	Sec substrate; hydrolase; carbohydrate binding; carbohydrate metabolic process; unknown function	1	4	3	2	2	0	non-significant		-1.43456	non-significant		0.180592	Mutant_unique		-0.182939	non-significant		-2.09041	non-significant		0.618188	non-significant
SLIV_32570	A0A076MA75	X	Secreted protein (Sec) - Unknown function	Sec substrate; unknown function	0	0	4	5	0	0	Mutant_unique			non-significant			Mutant_unique			non-significant			non-significant			non-significant
SLIV_13710	A0A076M493	X	Secreted protein (TAT) - unknown function	TAT substrate; unknown function	0	6	1	1	1	1	non-significant			non-significant			non-significant			non-significant			non-significant			non-significant
SLIV_15080	D6EFE7	E	Secreted Lipoprotein (Sec) - Lipoprotein localisation LolA/LolB/LppX-like protein (IPR029046)	Sec substrate; lipoprotein; transport; macromolecule localization; housekeeping function	7	7	6	7	6	5	non-significant	0.197213	-0.995759	non-significant	0.421014	0.343494	non-significant	0.835068	-0.430627	non-significant	0.816621	-0.390453	WT_abundant	0.0169994	1.08629	non-significant	0.727421	-0.824624
SLIV_26525	A0A076M755	X	Secreted protein (Sec) - Ferritin-related protein (IPR012347)	Sec substrate; iron binding; metal binding; unknown function	7	7	6	7	6	5	non-significant	0.594796	0.348415	non-significant	0.583976	0.175401	non-significant	0.662321	0.236143	non-significant	0.940781	-0.317364	WT_abundant	0.000603176	2.18653	non-significant	0.00200857	-0.750763
SLIV_02340	A0A076LTW5	E	Secreted Lipoprotein (Sec) - Lipoprotein localisation LolA/LolB/LppX (IPR029046)	Sec substrate; lipoprotein; transport; macromolecule localization; housekeeping function	7	7	6	7	5	5	non-significant	0.285345	-0.679741	non-significant	0.201801	1.03974	non-significant	0.619083	-0.688761	non-significant	0.163794	-0.878113	WT_abundant	0.0265907	1.63027	non-significant	0.0447105	-0.6022
SLIV_23870	D6EXZ2	X	Secreted protein (Sec) - Prolyl tri/tetrapeptidyl aminopeptidase (EC 3.4.11.-) (Tripeptidyl aminopeptidase)	Sec substrate; hydrolase; peptidase; proteolysis; metal binding; metabolic process	7	7	6	7	6	5	non-significant	0.755567	0.0497523	non-significant	0.980213	-0.0402986	non-significant	0.406242	0.420662	non-significant	0.465044	0.235746	WT_abundant	0.00567739	1.60875	non-significant	0.158943	-0.290851
SLIV_22180	D6ETL8	E	Secreted lipoprotein (TAT) - SurA chaperone (IPR027304)	TAT substrate; lipoprotein; isomerase; protein folding; housekeeping function	7	7	6	7	6	4	non-significant	0.0537755	1.28769	non-significant	0.252863	0.422389	non-significant	0.202684	0.718023	non-significant	0.107176	0.777961	WT_abundant	0.000157064	2.95689	non-significant	0.00222862	-0.285007
SLIV_22535	D6EUY0	X	Secreted protein (Sec) - Unknown function	Sec substrate; unknown function	7	7	5	7	5	5	non-significant	0.179281	-0.680939	non-significant	0.0708292	-1.10327	non-significant	0.681257	-0.454469	non-significant	0.928697	-0.149712	WT_abundant	0.0365897	1.14387	non-significant	0.341499	-0.229207
SLIV_09975	D6EQ63	X	Secreted protein - ESAT-6-like protein (T7SS EsxA protein)	T7 substrate; unknown virulence	7	7	6	7	6	5	non-significant	0.123974	-0.916075	non-significant	0.233336	0.445778	non-significant	0.301534	0.331066	non-significant	0.42978	0.0587177	WT_abundant	0.00317839	1.24933	non-significant	0.00586656	-0.111905
SLIV_18345	D6ELA1	P	Secreted protein (Sec) - Penicillin binding protein	Sec substrate; penicillin binding; cell-wall biosynthesis; housekeeping function	7	7	6	7	6	5	non-significant	0.290352	0.493897	non-significant	0.14516	0.738684	non-significant	0.412945	0.313951	non-significant	0.377976	0.247025	WT_abundant	0.00133179	1.90548	non-significant	0.196984	-0.0252138
SLIV_13615	D6EXS8	X	Secreted protein (Sec) - ATP/GTP-binding protein with Tachylectin 2 domain (IPR023294)	Sec substrate; carbohydrate binding; nucleotide binding; unknown function	7	7	6	7	6	5	non-significant	0.81525	-0.103719	non-significant	0.617671	-0.249032	non-significant	0.917744	-0.0842944	non-significant	0.34439	-0.506123	WT_abundant	0.000193115	2.82313	non-significant	0.429687	0.287154
SLIV_09410	D6EP33	X	Secreted protein (Sec) - Peptidase	Sec substrate; hydrolase; peptidase; proteolysis; metal binding; unknown function	7	7	5	7	5	5	WT_abundant	0.00285715	2.08292	non-significant	0.49367	0.104739	non-significant	0.0297462	0.822575	non-significant	0.448865	0.130807	WT_abundant	3.40908e-06	4.172	non-significant	0.0713893	0.434724
SLIV_19035	D6EN69	P	Secreted protein (Sec) - Penicillin binding protein A	Sec substrate; penicillin binding; cell-wall biosynthesis; housekeeping function	7	7	6	7	6	5	non-significant	0.23968	0.573453	non-significant	0.347707	0.425146	non-significant	0.384101	0.352606	non-significant	0.57576	0.111989	WT_abundant	0.00061366	2.10814	non-significant	0.0502852	1.55447
SLIV_04140	A0A076LUU8	X	Secreted protein (Sec) - Endopeptidase, NLPC/P60 domain (IPR000064)	Sec substrate; hydrolase; peptidase; proteolysis; unknown function	7	7	6	7	4	5	non-significant	0.179346	1.04502	non-significant	0.906905	-0.327986	non-significant	0.0808004	1.11668	non-significant	0.103511	0.880286	WT_abundant	0.034854	1.46406	non-significant	0.584198
SLIV_06435	D6EIE1	P	Secreted protein (Sec) - Amidase	Sec substrate; amidase; hydrolase; cell-wall biosynthesis; housekeeping function	6	6	4	7	2	5	non-significant	0.793373	-0.41504	non-significant	0.997098	-0.496363	non-significant	0.8172	-0.243836	non-significant	0.736768	-0.126321	WT_unique		-0.226773	non-significant	0.0686677	-1.38962
SLIV_07480	D6EKS6	X	Secreted protein (Sec) - Carboxypeptidase	Sec substrate; hydrolase; peptidase; metallopeptidase; proteolysis; zinc ion binding; metallocarboxypeptidase activity; cell-wall biosynthesis; housekeeping function	7	7	6	7	0	5	non-significant	0.155528	1.45446	non-significant	0.0726344	1.72929	non-significant	0.457994	-0.890868	non-significant	0.252866	-1.24227	WT_unique			non-significant	0.614248	-1.20945
SLIV_25740	D6EFV3	E	Secreted Lipoprotein (Sec) - SGNH hydrolase-type esterase domain (IPR013830)	Sec substrate; lipoprotein; hydrolase; unknown function	6	4	6	7	1	4	non-significant	0.614323	-0.537	non-significant	0.567506	-0.861527	non-significant	0.285087	-0.850691	non-significant	0.27547	-0.409411	WT_unique		-0.422371	non-significant	0.381601	-0.688002
SLIV_17370	A0A076LZW9	X	Secreted protein (Sec) - Endopeptidase, NLPC/P60 domain (IPR000064)	Sec substrate; hydrolase; peptidase; proteolysis; unknown function	7	7	6	7	2	5	non-significant	0.963775	-0.0626519	non-significant	0.989813	0.0181743	non-significant	0.997501	0.100774	non-significant	0.885107	0.250972	WT_unique		6.45859	non-significant	0.439035	-0.186202
SLIV_35790	D6EEY5	X	Secreted protein (Sec) - SGNH hydrolase-type esterase domain containing protein (IPR013830)	Sec substrate; hydrolase; esterase; lipase; unknown function	7	5	6	7	1	3	WT_unique			non-significant	0.971197	-0.199784	non-significant	0.492372	-0.667611	non-significant	0.540264	-0.790644	WT_unique		0.399742	non-significant	0.274385	0.642966
SLIV_04650	D6EF40	X	Secreted protein (Sec) - Peptidase containing LysM_dom (IPR018392) and Peptidase M23 (IPR016047) domains	Sec substrate; hydrolase; peptidase; proteolysis; metal binding; cell-wall bioregenesis; housekeeping function	7	7	6	7	1	5	non-significant	0.236357	0.820066	non-significant	0.288156	-0.728988	WT_abundant	0.00823205	2.34728	non-significant	0.0770087	1.11413	WT_unique		2.24544	non-significant	0.140512
SLIV_12695	D6EW56	X	Secreted protein (Sec) - ATP-binding protein	Sec substrate; unknown function	7	7	6	7	6	5	non-significant	0.0558733	-1.84227	Mutant_abundant	0.010943	-3.14864	non-significant	0.12338	-1.59613	non-significant	0.0543571	-1.3816	Mutant_abundant	0.000862456	-2.43689	WT_abundant	0.00838681	1.39476
SLIV_26680	D6EHJ4	X	Secreted protein (Sec) - Putative 23.9 kDa protein in glnII region (Secreted protein)	Sec substrate; unknown function	7	7	6	7	6	5	non-significant	0.195327	-0.770359	non-significant	0.346968	-0.865007	non-significant	0.152096	0.916963	non-significant	0.397047	0.308074	non-significant	0.0586939	0.781858	WT_abundant	0.000251045	1.04998
SLIV_07145	D6EKL3	X	Secreted protein (TAT) - Protein of unknown function DUF312 (IPR005506)	Sec substrate; unknown function	7	7	6	7	6	5	non-significant	0.972406	-0.161407	non-significant	0.19409	-1.01348	non-significant	0.0712739	1.03499	non-significant	0.291991	0.359144	non-significant	0.377407	-0.448504	WT_abundant	0.00173564	1.09398
SLIV_21910	D6ETG7	P	Secreted protein (Sec) - Penicillin binding protein	Sec substrate; penicillin binding; cell-wall biosynthesis; housekeeping function	7	7	6	7	6	5	non-significant	0.655142	-0.504514	non-significant	0.0725731	-1.10099	non-significant	0.842087	-0.43086	non-significant	0.159622	-1.26226	non-significant	0.929389	-0.314279	WT_abundant	0.0019696	1.52139
SLIV_26345	D6EHC4	E	Secreted Lipoprotein (Sec) - EfeO-type cupredoxin-like lipoprotein	Sec substrate; lipoprotein; metal binding; copper homeostasis; housekeeping function	5	3	4	5	4	5	non-significant	0.972406	-0.123754	non-significant	0.734368	0.0812033	non-significant	0.936411	-0.438825	non-significant	0.863247	-0.308654	non-significant	0.296844	-0.465796	WT_abundant	0.00164444	2.67498
SLIV_12485	D6EW13	E	Secreted Lipoprotein (Sec) - Peptidase S33 tripeptidyl aminopeptidase-like protein	Sec substrate; lipoprotein; hydrolase; protective immunity	7	7	6	7	5	5	non-significant	0.488204	-0.782031	non-significant	0.281549	-0.867966	non-significant	0.927946	-0.162586	non-significant	0.890803	-0.0494731	non-significant	0.202378	0.749763	WT_abundant	0.00594058	5.48309
SLIV_28340	D6ELE5	P	Secreted protein (Sec) - Penicillin binding protein	Sec substrate; penicillin binding; cell-wall biosynthesis; housekeeping function	7	7	6	7	6	5	non-significant	0.282251	-0.681992	non-significant	0.220617	-0.839104	non-significant	0.90384	-0.319301	non-significant	0.303801	-0.810714	WT_abundant	0.00728197	1.35423	WT_abundant	0.0053677	1.1691
SLIV_07615	D6EKV2	X	Secreted protein (Sec) - Unknown function	Sec substrate; unknown function	7	7	6	7	6	5	non-significant	0.0944537	1.10778	non-significant	0.433921	0.463077	non-significant	0.620802	0.192032	non-significant	0.401465	0.328869	WT_abundant	0.035124	1.21425	WT_abundant	0.0336908
SLIV_05320	D6EGL9	X	Secreted protein (TAT) - Quinoprotein alcohol dehydrogenase-like superfamily (IPR011047)	TAT substrate; dehydrogenase; alcohol dehydrogenase; metabolic process	3	3	3	5	6	1	WT_unique		-3.05771	WT_unique			non-significant	0.680423	-1.5651	non-significant	0.0656428	-1.96625	Mutant_abundant	4.91988e-05	-6.12546	WT_unique		-1.02953
SLIV_29120	D6EML8	X	Secreted protein (Sec) - Lipase 1 (EC 3.1.1.3)	Sec substrate; hydrolase; esterase; lipase	5	3	3	3	6	1	WT_unique		-1.483	WT_unique			non-significant	0.835068	0.11271	non-significant	0.928697	-0.355002	Mutant_abundant	0.000586243	-8.313	WT_unique		0.0784935
SLIV_32550	D6EU07	X	Secreted protein (Sec) - Phospholipase A2 domain protein (IPR016090)	Sec substrate; hydrolase; phospholipase; housekeeping function	7	2	6	7	6	0	WT_unique			WT_unique		-2.40187	Mutant_abundant	0.0219161	-2.3348	non-significant	0.0771662	-2.61742	Mutant_abundant	7.19297e-05	-4.27145	WT_unique
SLIV_29275	A0A076M6T0	X	Secreted protein (TAT) - Uncharacterised conserved protein UCP016719 (IPR008302)	TAT substrate; uncharacterized function	3	7	4	4	4	0	non-significant	0.61649	0.758039	WT_unique		-0.874008	non-significant	0.997501	0.269779	non-significant	0.743422	0.399087	Mutant_abundant	0.0484984	-2.98249	WT_unique
SLIV_13950	D6ECI8	E	Secreted Lipoprotein (Sec) - ABC transporter substrate-binding protein PnrA-like (IPR003760)	Sec substrate; membrane transport; ABC transporter system; transport	4	1	4	4	6	1	non-significant	0.739014	-0.619595	non-significant	0.779884	-0.661335	non-significant	0.259664	-1.29009	non-significant	0.705835	-1.24275	non-significant	0.271723	-1.04502	WT_unique		-0.510465
SLIV_02045	D6EVP1	X	Secreted protein (Sec) - Carbohydrate-binding/sugar hydrolysis domain (IPR006633) with Pectin lyase fold (IPR012334)	Sec substrate; lyase; carbohydrate binding; virulence;	7	7	6	7	5	2	WT_abundant	0.00249167	3.3099	non-significant	0.220617	0.0267865	non-significant	0.887418	-0.457179	non-significant	0.316379	-1.0783	non-significant	0.357058	0.391029	WT_unique		2.19193
SLIV_27365	D6EJ35	X	Secreted protein (TAT) - Phospholipase D (EC 3.1.4.4) (Secreted alkaline phosphatase)	TAT substrate; hydrolase; phospholipase; metabolic process	6	5	6	7	3	0	WT_unique		2.58847	WT_unique		1.41092	non-significant	0.221819	-1.43849	non-significant	0.0805202	-1.86993	non-significant	0.406293	0.475188	WT_unique
SLIV_29175	A0A076M6R9	E	Secreted Lipoprotein (Sec) - Unknown function	Sec substrate; lipoprotein; unknown function	7	0	5	6	2	2	non-significant	0.739014	0.366957	non-significant	0.93549	-0.334328	non-significant	0.824024	-0.357454	non-significant	0.291349	-0.59663	WT_unique		0.15331	WT_unique		-0.617374
SLIV_13360	D6EXM9	X	Secreted protein (Sec) - Flp pilus assembly protein CpaB	Sec substrate; pilus; structural protein; motility; housekeeping function	7	5	6	4	2	1	non-significant	0.530524	-0.593836	non-significant	0.678951	-0.647678	non-significant	0.839232	0.20496	non-significant	0.728443	0.481975	WT_unique		0.917778	WT_unique		-0.575832
SLIV_27255	D6EJ13	X	Secreted protein (Sec) - FtsI	Sec substrate; cell-division; housekeeping function	7	2	2	3	0	1	WT_unique		0.368777	WT_unique		1.51995	WT_unique		0.634197	non-significant	0.0840364	1.88854	WT_unique			WT_unique		0.534592
SLIV_14330	D6ECR6	X	Secreted protein (TAT) - Unknown function	TAT substrate; unknown function	7	6	5	4	1	1	WT_unique		2.22743	non-significant	0.194212	1.21003	non-significant	0.548976	0.385845	non-significant	0.32084	0.646142	WT_unique		0.26009	WT_unique		0.661518
SLIV_23855	A0A076M9U8	E	Secreted Lipoprotein (Sec) - Quinoprotein alcohol dehydrogenase-like superfamily protein (IPR011047)	Sec substrate; lipoprotein; dehydrogenase; metabolic process	7	5	6	7	2	1	non-significant	0.946297	0.444235	non-significant	0.555483	-0.267438	non-significant	0.680423	-0.355452	non-significant	0.173914	-0.670343	WT_unique		1.10822	WT_unique		1.15815
SLIV_07790	D6ELN7	X	Secreted protein (Sec) - Solute-binding protein	Sec substrate; solute binding protein; membrane transport system; transport	5	3	2	4	0	1	WT_unique			WT_unique		-0.889349	WT_unique		-1.61438	non-significant	0.0517041	-1.64462	WT_unique			WT_unique		1.35998
SLIV_36175	A0A076MAN3	E	Secreted Lipoprotein (Sec) - Solute binding lipoprotein	Sec substrate; ABC transporter system; solute binding; transport	7	7	3	5	1	2	non-significant	0.60389	0.190187	non-significant	0.183663	-0.862159	non-significant	0.094729	0.958769	non-significant	0.497604	0.106326	WT_unique		0.735368	WT_unique		3.02651
SLIV_17615	D6EK57	X	Secreted protein (Sec) - 5'-Nucleotidase/apyrase (IPR006179)	hydrolase; nucleotidase; sugar hydrolase; Sec substrate; hydrolysis of environmental macromolecules	7	6	1	3	1	0	WT_unique		0.480552	WT_unique		-1.31681	WT_unique		0.703423	non-significant	0.648698	-0.351716	WT_unique		0.41738	WT_unique
SLIV_24625	D6ECY8	X	Secreted protein (Sec) - Cell shape-determining protein MreC (Cell shape protein MreC)	Sec substrate; regulation of cell shape; housekeeping function	7	7	6	7	1	2	non-significant	0.669979	-0.476327	non-significant	0.880632	-1.11004	non-significant	0.406242	-1.74821	non-significant	0.241784	-2.3101	WT_unique		-1.9796	WT_unique
SLIV_35575	A0A076MBT2	E	Secreted Lipoprotein (Sec) - Solute-binding lipoprotein	Sec substrate; lipoprotein; solute binding protein; membrane transport system; transport	7	7	5	5	6	5	non-significant	0.739014	-0.111853	non-significant	0.433921	-0.787762	WT_abundant	0.0273964	3.73431	WT_abundant	0.00292965	4.22475	non-significant	0.0938741	1.72839	Mutant_abundant	0.0314058	-1.0326
SLIV_25160	A0A076MAJ2	E	Secreted Lipoprotein (Sec) - ABC-transporter metal-binding lipoprotein	Sec substrate; lipoprotein; transporter; metal binding; ABC transporter complex; membrane transport system; transport	7	7	6	7	6	5	non-significant	0.451945	-0.622514	non-significant	0.766811	-0.270214	WT_abundant	0.00302074	2.849	WT_abundant	0.000792823	2.83562	non-significant	0.701665	0.0615124	Mutant_abundant	0.00114268	-1.01118
SLIV_31645	D6ESC6	X	Secreted protein (Sec) - Tripeptidyl aminopeptidase	Sec substrate; hydrolase; peptidase; proteolysis; metabolic process	7	7	6	7	6	5	non-significant	0.893638	-0.526713	non-significant	0.483997	0.0253644	non-significant	0.057886	1.10991	WT_abundant	0.0238753	1.13243	non-significant	0.178496	-0.866061	non-significant	0.0734012	-0.7576
SLIV_20730	A0A076MBY3	P	Secreted protein (Sec) - D-alanyl-D-alanine carboxypeptidase	Sec substrate; hydrolase; peptidase; proteolysis; serine-type peptidase activity; virulence	7	7	6	7	4	5	non-significant	0.0867948	1.50119	non-significant	0.225866	0.343653	WT_abundant	0.0125213	2.17722	WT_abundant	0.000483584	3.26851	non-significant	0.987067	0.141977	non-significant	0.393864	0.147937
SLIV_35580	D6EEU4	E	Secreted Lipoprotein (Sec) - Quinoprotein amine dehydrogenase	Sec substrate; lipoprotein; redox homeostasis; cell protection in extreme environments; housekeeping function	7	7	6	7	6	5	non-significant	0.446769	-0.546555	non-significant	0.551158	-0.486922	WT_abundant	0.00167963	5.81797	WT_abundant	3.23425e-06	7.78167	non-significant	0.432483	0.388029	non-significant	0.00304847	0.205464
SLIV_35570	D6EEU2	E	Secreted Lipoprotein (Sec) - Quinoprotein amine dehydrogenase, beta chain-like (IPR011044)	Sec substrate; lipoprotein; redox homeostasis; cell protection in extreme environments; housekeeping function	7	7	6	7	6	5	non-significant	0.842944	-0.212153	non-significant	0.94871	-0.0599417	WT_abundant	0.00197816	4.42537	WT_abundant	0.000149833	6.5683	WT_abundant	0.0148452	1.1627	non-significant	0.0128173	-0.735866
SLIV_07045	A0A076M3V3	X	Secreted protein (Sec) - Ser/Thr protein kinase with Concanavalin A-like lectin/glucanase domain (IPR013320)	Sec substrate; unknown function; lectin binding; carbohydrate binding;	7	7	6	7	6	5	non-significant	0.718672	-0.422561	non-significant	0.50029	-0.56397	WT_abundant	0.0125213	1.68001	WT_abundant	0.005042	1.53822	WT_abundant	0.000849103	2.23796	non-significant	0.448824	-0.438138
SLIV_22865	A0A076M538	X	Secreted protein (Sec) - Carboxy-terminal processing protease	Sec substrate; hydrolase; peptidase; proteolysis; serine-type peptidase activity; unknown function	7	7	6	7	6	5	non-significant	0.996677	-0.119342	non-significant	0.791586	-0.316452	non-significant	0.0808004	0.826677	WT_abundant	0.0143362	1.17616	WT_abundant	0.00513395	1.52016	non-significant	0.532636	0.129192
SLIV_24720	D6ED10	X	Secreted protein (Sec) - Subtilisin-family peptidase	Sec substrate; carbohydrate binding; unknown function	7	7	6	7	6	5	non-significant	0.282251	-0.723203	non-significant	0.161205	-0.948195	non-significant	0.189971	0.810647	WT_abundant	0.00873745	1.37803	WT_abundant	0.00195487	1.92077	non-significant	0.689955	0.774101
SLIV_07040	D6EJT1	X	Secreted protein (Sec) - Protein containing Rhs repeat-associated core (IPR022385) and YD repeat	Sec substrate; unknown function; self proteolysis	7	7	4	4	5	5	non-significant	0.289151	0.554737	non-significant	0.472248	0.305398	WT_abundant	0.00167963	4.0052	WT_abundant	0.00107478	4.33146	WT_abundant	7.98994e-05	3.12902	non-significant	0.545274
SLIV_24490	D6ECW3	X	Secreted protein (Sec) - Peptidase S8, subtilisin-related	Sec substrate; hydrolase; peptidase; proteolysis; metal binding; housekeeping function	7	7	4	7	0	5	WT_abundant	0.00118824	2.99115	WT abundant	0.0267185	1.31782	WT_abundant	0.00197816	4.40858	WT_abundant	0.00107478	3.16272	WT_unique			WT_abundant	0.00114268	2.66363
SLIV_25265	A0A076MAM3	X	Secreted protein (TAT) - Phosphodiester glycosidase (IPR018711)	TAT substrate; hydrolase; phosphodiester glycosidase; unknown function	7	7	5	5	0	0	non-significant	0.145749	1.03705	non-significant	0.220617	0.539716	WT_abundant	0.0164077	2.52199	WT_abundant	0.013644	1.98822	WT_unique			WT_unique		2.97781
SLIV_00915	A0A076LX52	X	Secreted protein (TAT) - Peptide/nickel binding protein, MppA-type (IPR030678)	TAT substrate; solute binding protein; ABC transporter complex; membrane transport system; transport	7	6	0	0	6	5	non-significant	0.118465	-1.55429	Mutant_abundant	0.0386254	-1.97346	WT_unique			WT_unique			Mutant_abundant	8.09828e-05	-3.28068	Mutant_abundant	0.0128173	-1.24215
SLIV_13465	D6EXP9	X	Secreted protein (Sec) - Secreted Peptidase S1, PA clan (IPR009003)	Sec substrate; hydrolase; peptidase; proteolysis; unknown function	5	0	2	0	6	3	WT_unique		0.0224916	WT_unique		0.622168	WT_unique		0.413161	WT_unique			Mutant_abundant	1.80646e-06	-9.17601	non-significant	0.151429	-1.03123
SLIV_20620	A0A076M7Y4	E	Secreted Lipoprotein (Sec) - Unknown function	Sec substrate; lipoprotein; unknown function	3	1	1	1	4	3	non-significant	0.451945	1.52096	WT_unique		2.48894	WT_unique		4.14546	WT_unique		3.51087	non-significant	0.802245	-0.105402	non-significant	0.0970766	-0.842283
SLIV_33280	A0A076M965	E	Secreted Lipoprotein (Sec) - Unknown function	Sec substrate; lipoprotein; unknown function	4	4	2	1	1	3	non-significant	0.0897525	-2.58104	non-significant	0.319827	-2.40949	WT_unique		1.74396	WT_unique		-1.31053	WT_unique		0.460041	non-significant	0.165747	-0.607516
SLIV_25205	D6EEE8	X	Secreted protein (Sec) - Unknown function	Sec substrate; unknown function	3	7	5	2	2	5	Mutant_abundant	0.00285715	-4.39296	WT_unique		-0.0751728	non-significant	0.703928	-1.95182	WT_unique		1.02814	WT_unique		-0.354875	WT_abundant	0.0165668
SLIV_16315	D6EH88	X	Secreted protein (Sec) - Unknown function	Sec substrate; unknown function	4	0	2	2	6	1	non-significant	0.299474	-0.85545	WT_unique		-1.8199	WT_unique		0.0389388	WT_unique		-0.159244	Mutant_abundant	0.000126146	-3.77593	WT_unique		-3.05436
SLIV_34750	D6ED83	E	Secreted Lipoprotein (Sec) - Putative cell adhesion molecule - (FAS1 domain - IPR000782)	Sec substrate; lipoprotein; adhesion; housekeeping function	3	1	2	2	6	2	non-significant	0.122929	-1.56251	non-significant	0.340774	-1.18911	WT_unique		0.444062	WT_unique		-0.896887	Mutant_abundant	0.000324296	-4.75138	WT_unique		-1.44843
SLIV_23290	A0A076M3D7	X	Secreted protein (Sec) - Histidine kinase-like ATPase	Sec substate; signaling process; response to stimulus	4	5	5	1	6	1	non-significant	0.926619	-0.29954	non-significant	0.494849	-1.13014	non-significant	0.674268	0.0766386	WT_unique		-1.10509	Mutant_abundant	0.0391909	-1.60957	WT_unique		-0.851417
SLIV_08660	D6EMX9	X	Secreted protein (Sec) - Unknown function	Sec substrate; unknown function	6	7	3	0	0	2	non-significant	0.869466	-0.0673685	non-significant	0.685916	-0.949184	non-significant	0.148209	1.50752	WT_unique			WT_unique			WT_unique		-0.532798
